# Supplementary material for: Evaluation of Different Reference Based Annotation Strategies Using RNA-Seq – A Case Study in Drososphila pseudoobscura
Source: PubMed Central journal article supplement (PMC3463616; doi:10.1371/journal.pone.0046415), 2012-10-03

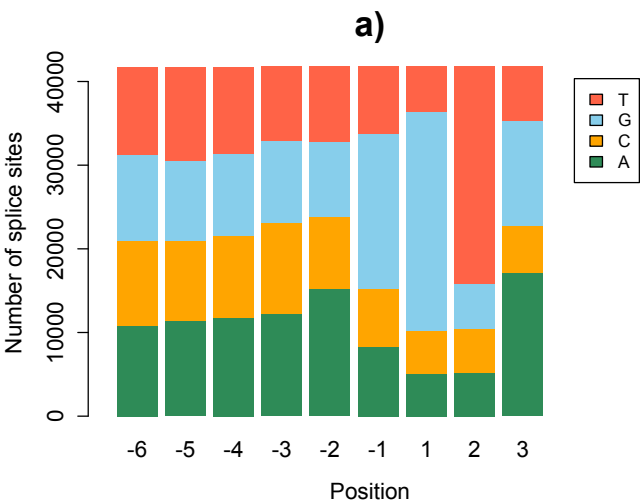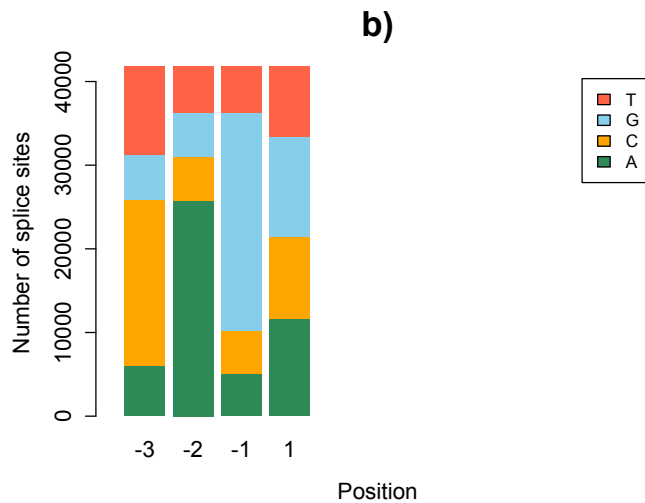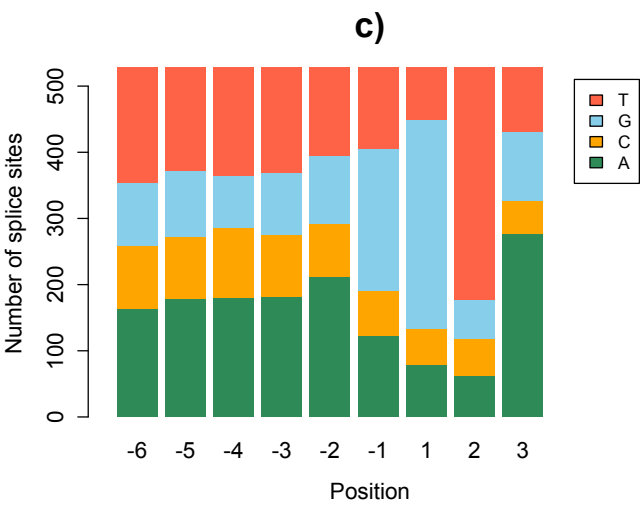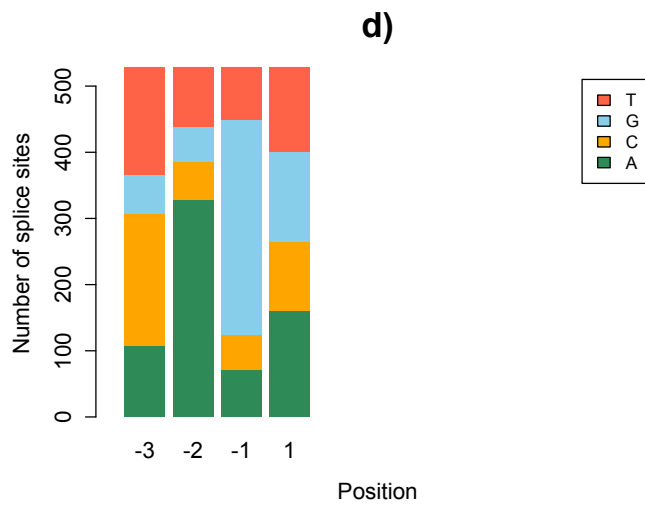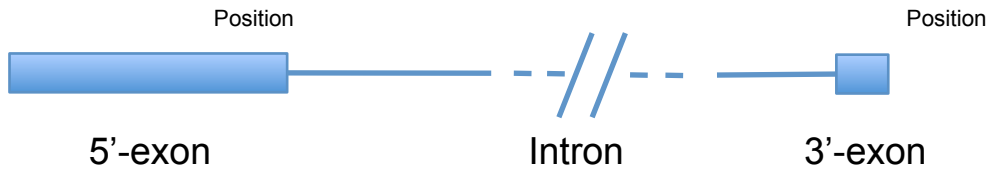

Supplement: pone.0046415.s003.pdf [file pone.0046415.s003.pdf]
