# Supplementary material for: Evaluation of Different Reference Based Annotation Strategies Using RNA-Seq – A Case Study in Drososphila pseudoobscura
Source: PLoS One. 2012 Oct 3;7(10):e46415. doi: 10.1371/journal.pone.0046415 (PMC3463616; doi:10.1371/journal.pone.0046415)
Supplement: Table S5 — Table with new-extra genes and their annotation properties. The first five characters of the gene_id contain the strain from which the longest version of the gene was extracted (for details see Materials and Methods). (XLS) [file pone.0046415.s013.xls]

## Sheet: new-extra-genes-final-statistic
gene_id	length	GC	blastx_mel	blastx_per	blastn_mel	blastn_per	exonerate_mel	exonerate_per	CPC_class_plus_strand	coding_potential_score_plus_strand	CPC_class_minus_strand	coding_potential_score_minus_strand
ps88f_comp10253_c0_seq1	497	0.412475	No	No	Yes	Yes	No	No	noncoding	-1.39457	noncoding	-1.3212
ps88f_comp1102_c0_seq1	2091	0.328551	No	No	Yes	Yes	No	No	noncoding	-1.27705	noncoding	-1.36851
ps88f_comp1167_c0_seq1	1327	0.327054	No	No	No	Yes	No	No	noncoding	-1.39085	coding	0.00872202
ps88f_comp15581_c0_seq1	319	0.661442	No	No	Yes	No	No	No	noncoding	-0.782489	noncoding	-0.313407
ps88f_comp16469_c0_seq1	279	0.351254	No	No	No	Yes	No	No	noncoding	-1.15742	noncoding	-1.0837
ps88f_comp18396_c0_seq1	696	0.508621	No	No	Yes	Yes	No	No	noncoding	-0.207954	noncoding	-1.08286
ps88f_comp19528_c0_seq1	881	0.284904	No	No	No	Yes	No	No	noncoding	-1.08575	noncoding	-1.26939
ps88f_comp21788_c0_seq1	212	0.391509	No	No	Yes	No	No	No	noncoding	-1.25246	noncoding	-1.28252
ps88f_comp22539_c0_seq1	382	0.554974	No	No	No	No	No	No	noncoding	-0.600096	noncoding	-1.11168
ps88f_comp23739_c0_seq1	365	0.635616	No	No	No	Yes	No	No	noncoding	-1.01492	noncoding	-1.10124
ps88f_comp24004_c0_seq1	205	0.356098	No	No	No	Yes	No	No	noncoding	-1.4536	noncoding	-1.10363
ps88f_comp24121_c0_seq1	267	0.28839	No	No	No	Yes	No	No	noncoding	-1.03216	noncoding	-1.27807
ps88f_comp24240_c0_seq1	269	0.230483	No	No	No	Yes	No	No	noncoding	-1.19394	noncoding	-1.42696
ps88f_comp3700_c0_seq3	1016	0.310039	No	No	Yes	Yes	No	No	noncoding	-1.4468	noncoding	-1.17129
ps88f_comp4410_c0_seq1	1308	0.383792	No	No	No	Yes	No	No	noncoding	-1.15487	noncoding	-0.176276
ps88f_comp466_c0_seq1	844	0.414692	Yes	Yes	No	Yes	No	No	noncoding	-0.955359	coding	0.642445
ps88f_comp4843_c0_seq1	457	0.28884	No	No	No	Yes	No	No	noncoding	-1.37571	noncoding	-1.46599
ps88f_comp4985_c0_seq1	669	0.307922	No	No	No	Yes	No	No	noncoding	-1.22519	noncoding	-1.3946
ps88f_comp5982_c0_seq1	391	0.401535	No	No	Yes	No	No	No	noncoding	-1.15254	noncoding	-1.29207
ps88f_comp641_c0_seq1	1073	0.562908	No	No	Yes	No	No	No	coding	0.6853	noncoding	-0.350509
ps88f_comp6889_c0_seq1	731	0.367989	No	No	No	Yes	No	No	noncoding	-1.21827	noncoding	-0.976972
ps88f_comp7244_c0_seq1	275	0.269091	No	No	No	Yes	No	No	noncoding	-1.53216	noncoding	-1.39155
ps88f_comp7304_c0_seq2	436	0.268349	No	No	Yes	No	No	No	noncoding	-1.04719	noncoding	-0.983114
ps88f_comp918_c0_seq1	438	0.33105	No	No	Yes	Yes	No	No	noncoding	-1.11346	noncoding	-1.31343
ps88m_comp1101_c0_seq4	1654	0.354897	No	No	No	Yes	No	No	noncoding	-1.33768	coding	0.357403
ps88m_comp1308_c0_seq2	454	0.5	No	Yes	Yes	Yes	No	No	noncoding	-0.741167	noncoding	-0.926826
ps88m_comp13230_c0_seq1	457	0.391685	Yes	No	No	Yes	No	No	noncoding	-1.07139	noncoding	-1.2288
ps88m_comp1368_c0_seq1	542	0.387454	No	No	No	Yes	No	No	noncoding	-0.441295	noncoding	-1.40715
ps88m_comp16575_c0_seq1	469	0.356077	No	No	No	Yes	No	No	noncoding	-0.858091	noncoding	-1.17093
ps88m_comp1786_c0_seq1	439	0.455581	Yes	No	No	Yes	No	No	noncoding	-1.3122	noncoding	-1.22152
ps88m_comp1819_c0_seq1	706	0.597734	No	No	No	No	No	No	noncoding	-0.475862	noncoding	-0.242075
ps88m_comp18671_c0_seq1	1423	0.38721	No	No	Yes	Yes	No	No	noncoding	-1.18367	noncoding	-0.419507
ps88m_comp20596_c0_seq1	908	0.321586	No	No	No	Yes	No	No	noncoding	-1.09967	noncoding	-1.345
ps88m_comp2268_c0_seq1	2016	0.382937	No	No	No	Yes	No	No	coding	1.12384	noncoding	-1.13808
ps88m_comp24350_c0_seq1	455	0.281319	No	No	No	Yes	No	No	noncoding	-1.37347	noncoding	-1.40157
ps88m_comp24408_c0_seq1	257	0.381323	No	No	No	Yes	No	No	noncoding	-1.45445	noncoding	-1.14094
ps88m_comp25068_c0_seq1	629	0.321145	No	No	No	Yes	No	No	noncoding	-1.1181	noncoding	-0.969432
ps88m_comp31655_c0_seq1	291	0.309278	No	No	No	Yes	No	No	noncoding	-1.47298	noncoding	-1.32324
ps88m_comp33728_c0_seq1	552	0.393116	No	No	No	No	No	No	noncoding	-1.3582	noncoding	-1.44259
ps88m_comp3496_c0_seq1	989	0.390293	No	No	No	Yes	No	No	noncoding	-0.787348	noncoding	-1.21967
ps88m_comp36082_c0_seq2	301	0.318937	No	No	No	Yes	No	No	noncoding	-1.22414	noncoding	-1.02223
ps88m_comp3943_c0_seq1	2402	0.414238	Yes	Yes	Yes	Yes	No	No	coding	0.588764	noncoding	-1.36084
ps88m_comp4212_c0_seq1	1534	0.477184	No	No	Yes	Yes	No	No	noncoding	-1.00811	coding	0.591733
ps88m_comp47637_c0_seq1	220	0.236364	No	No	Yes	Yes	No	No	noncoding	-1.18502	noncoding	-0.920341
ps88m_comp4992_c0_seq1	783	0.246488	No	No	No	Yes	No	No	noncoding	-1.20853	noncoding	-1.28472
ps88m_comp8552_c0_seq1	259	0.332046	No	No	No	Yes	No	No	noncoding	-1.27768	noncoding	-1.13341
ps88m_comp8575_c0_seq1	1035	0.47343	No	No	No	No	No	No	noncoding	-0.731675	noncoding	-0.382299
ps88m_comp978_c0_seq1	1074	0.408752	No	No	No	Yes	No	No	noncoding	-0.2326	noncoding	-1.11521
ps94f_comp1200_c0_seq1	2793	0.369853	Yes	Yes	No	Yes	No	No	coding	2.50033	noncoding	-1.16527
ps94f_comp1205_c0_seq1	385	0.454545	No	No	No	Yes	No	No	noncoding	-1.33343	noncoding	-1.436
ps94f_comp1555_c0_seq2	278	0.410072	No	No	No	Yes	No	No	noncoding	-1.41411	noncoding	-1.45728
ps94f_comp16339_c0_seq1	272	0.665441	No	Yes	No	Yes	No	No	noncoding	-0.78887	noncoding	-0.581606
ps94f_comp1827_c0_seq1	2333	0.414916	Yes	Yes	No	Yes	No	No	noncoding	-0.968152	coding	0.844842
ps94f_comp18481_c0_seq1	1031	0.346266	No	No	Yes	Yes	No	No	noncoding	-1.29074	noncoding	-1.26314
ps94f_comp1933_c0_seq1	455	0.27033	No	No	No	No	No	No	noncoding	-1.16697	noncoding	-1.19581
ps94f_comp23553_c0_seq2	498	0.373494	No	No	No	Yes	No	No	noncoding	-1.34068	noncoding	-1.04252
ps94f_comp24343_c0_seq1	309	0.349515	No	No	No	Yes	No	No	noncoding	-1.35844	noncoding	-1.42789
ps94f_comp24363_c0_seq1	477	0.337526	No	No	No	Yes	No	No	noncoding	-1.40611	noncoding	-1.44065
ps94f_comp25230_c0_seq1	479	0.290188	No	No	Yes	Yes	No	No	noncoding	-1.1348	noncoding	-0.888248
ps94f_comp25900_c0_seq1	338	0.301775	No	No	No	Yes	No	No	noncoding	-1.47081	noncoding	-1.39447
ps94f_comp28489_c0_seq1	304	0.391447	No	No	No	Yes	No	No	noncoding	-1.049	noncoding	-1.19877
ps94f_comp31024_c0_seq1	398	0.326633	No	No	Yes	No	No	No	noncoding	-1.25958	noncoding	-1.12723
ps94f_comp31598_c0_seq1	225	0.413333	No	No	No	Yes	No	No	noncoding	-1.33465	noncoding	-1.09664
ps94f_comp4011_c0_seq1	1918	0.347758	No	No	No	Yes	No	No	noncoding	-1.1324	coding	0.493801
ps94f_comp716_c0_seq1	229	0.401747	No	No	No	Yes	No	No	coding	0.372262	noncoding	-0.698255
ps94f_comp724_c0_seq1	2637	0.368221	No	No	No	Yes	No	No	noncoding	-1.18888	coding	1.88977
ps94f_comp8074_c0_seq1	788	0.364213	No	No	No	Yes	No	No	noncoding	-1.12211	noncoding	-1.31323
ps94m_comp10543_c0_seq4	1528	0.376309	No	No	No	Yes	No	No	coding	0.347983	noncoding	-1.32415
ps94m_comp11223_c0_seq1	227	0.273128	No	No	No	Yes	No	No	noncoding	-1.22212	noncoding	-1.36169
ps94m_comp1182_c0_seq2	1683	0.370766	No	No	No	Yes	No	No	noncoding	-1.32391	coding	0.696794
ps94m_comp12061_c0_seq1	235	0.255319	No	No	No	Yes	No	No	noncoding	-1.28162	noncoding	-1.17756
ps94m_comp1218_c0_seq1	964	0.574689	No	No	Yes	No	No	No	noncoding	-0.671014	coding	0.434732
ps94m_comp13056_c0_seq1	295	0.559322	No	No	No	No	No	No	noncoding	-1.33526	noncoding	-1.41718
ps94m_comp13583_c0_seq1	830	0.384337	Yes	Yes	No	Yes	No	No	noncoding	-0.60575	noncoding	-1.24681
ps94m_comp16083_c0_seq1	260	0.311538	No	No	No	Yes	No	No	noncoding	-1.39394	noncoding	-1.39681
ps94m_comp1640_c0_seq1	1681	0.337894	No	No	No	Yes	No	No	coding	0.983069	noncoding	-1.06437
ps94m_comp17348_c0_seq1	535	0.323364	No	No	No	Yes	No	No	noncoding	-1.14423	noncoding	-1.12383
ps94m_comp17560_c0_seq1	644	0.411491	No	No	No	Yes	No	No	noncoding	-1.2907	noncoding	-1.28203
ps94m_comp18104_c0_seq1	274	0.364964	No	No	No	Yes	No	No	noncoding	-1.15868	noncoding	-1.45747
ps94m_comp1906_c0_seq2	1416	0.49435	No	No	No	Yes	No	No	noncoding	-0.203764	noncoding	-1.10807
ps94m_comp1907_c0_seq1	954	0.442348	No	No	No	Yes	No	No	noncoding	-0.267349	noncoding	-1.39941
ps94m_comp19868_c0_seq1	326	0.315951	No	No	No	Yes	No	No	noncoding	-1.23527	noncoding	-1.32988
ps94m_comp2206_c0_seq3	3479	0.395516	No	No	Yes	Yes	No	No	noncoding	-0.94953	coding	0.412727
ps94m_comp2478_c0_seq1	1935	0.504393	No	No	No	No	No	No	coding	0.821056	noncoding	-1.19548
ps94m_comp27286_c0_seq1	289	0.352941	No	No	No	Yes	No	No	noncoding	-1.50283	noncoding	-1.3105
ps94m_comp2785_c0_seq1	297	0.474747	No	No	No	Yes	No	No	noncoding	-1.18545	noncoding	-1.5402
ps94m_comp2826_c0_seq1	1846	0.36403	Yes	Yes	No	Yes	No	No	coding	0.0772246	noncoding	-1.35067
ps94m_comp3093_c0_seq1	1813	0.335356	No	No	Yes	Yes	No	No	noncoding	-0.164227	noncoding	-1.22859
ps94m_comp31340_c0_seq1	312	0.294872	No	No	Yes	Yes	No	No	noncoding	-1.37457	noncoding	-1.25277
ps94m_comp32281_c0_seq1	314	0.423567	No	No	No	Yes	No	No	noncoding	-1.20155	noncoding	-1.12719
ps94m_comp372_c0_seq1	1391	0.396118	Yes	Yes	No	Yes	No	No	noncoding	-1.15736	coding	0.846179
ps94m_comp38739_c0_seq1	227	0.303965	No	No	No	Yes	No	No	noncoding	-1.17748	noncoding	-1.39956
ps94m_comp420_c0_seq1	854	0.36534	No	No	No	Yes	No	No	noncoding	-0.282988	noncoding	-1.01323
ps94m_comp45126_c0_seq1	276	0.34058	No	No	No	Yes	No	No	noncoding	-1.41159	noncoding	-1.42938
ps94m_comp4550_c0_seq1	723	0.282158	No	No	Yes	Yes	No	No	noncoding	-1.21491	noncoding	-1.1537
ps94m_comp4598_c0_seq2	1097	0.43938	No	No	No	Yes	No	No	noncoding	-1.47445	noncoding	-0.843692
ps94m_comp5784_c0_seq2	1161	0.323859	No	Yes	No	Yes	No	No	noncoding	-1.18885	noncoding	-1.41883
ps94m_comp7342_c0_seq2	264	0.378788	No	Yes	No	Yes	No	No	noncoding	-1.34625	noncoding	-1.11406
ps94m_comp7601_c0_seq1	1880	0.285106	No	No	Yes	Yes	No	No	noncoding	-1.06954	noncoding	-1.05475
