# Supplementary material for: Evaluation of Different Reference Based Annotation Strategies Using RNA-Seq – A Case Study in Drososphila pseudoobscura
Source: PLoS One. 2012 Oct 3;7(10):e46415. doi: 10.1371/journal.pone.0046415 (PMC3463616; doi:10.1371/journal.pone.0046415)
Supplement: Table S6 — Distribution of novel transcripts across samples. (XLS) [file pone.0046415.s014.xls]

transcript_id	ps94 males	ps94 females	ps88 males	ps88 females
TCONS_00000005	1	0	1	1
TCONS_00000021	1	0	0	1
TCONS_00000025	1	1	0	0
TCONS_00000027	1	0	1	0
TCONS_00000028	1	1	1	1
TCONS_00000030	1	1	1	1
TCONS_00000031	1	0	1	1
TCONS_00000037	1	1	0	1
TCONS_00000042	1	0	1	0
TCONS_00000043	1	0	1	0
TCONS_00000055	1	0	1	0
TCONS_00000056	1	1	0	1
TCONS_00000063	1	0	1	0
TCONS_00000086	1	0	1	1
TCONS_00000101	1	0	1	0
TCONS_00000142	1	0	1	0
TCONS_00000143	1	0	1	0
TCONS_00000157	1	1	0	0
TCONS_00000161	1	1	0	0
TCONS_00000168	1	1	0	0
TCONS_00000174	1	1	0	0
TCONS_00000201	1	1	1	1
TCONS_00000202	1	1	0	1
TCONS_00000203	1	0	0	1
TCONS_00000206	1	1	0	1
TCONS_00000207	1	1	0	1
TCONS_00000212	1	0	1	0
TCONS_00000214	1	0	1	0
TCONS_00000227	1	1	0	0
TCONS_00000230	1	0	1	0
TCONS_00000244	1	0	1	1
TCONS_00000245	1	0	1	1
TCONS_00000247	1	0	1	1
TCONS_00000260	1	1	0	0
TCONS_00000261	1	1	0	0
TCONS_00000265	1	1	1	0
TCONS_00000266	1	1	0	1
TCONS_00000267	1	0	0	1
TCONS_00000268	1	1	0	0
TCONS_00000269	1	0	1	0
TCONS_00000279	1	1	0	0
TCONS_00000281	1	1	1	1
TCONS_00000286	1	0	1	1
TCONS_00000287	1	1	0	0
TCONS_00000288	1	0	0	1
TCONS_00000297	1	1	1	1
TCONS_00000305	1	0	1	0
TCONS_00000308	1	0	1	0
TCONS_00000310	1	1	1	0
TCONS_00000336	1	0	1	0
TCONS_00000341	1	1	0	1
TCONS_00000345	1	0	1	1
TCONS_00000353	1	1	0	1
TCONS_00000356	1	1	0	1
TCONS_00000366	1	1	1	0
TCONS_00000368	1	1	0	1
TCONS_00000370	1	1	0	0
TCONS_00000371	1	1	0	1
TCONS_00000383	1	0	0	1
TCONS_00000384	1	0	1	0
TCONS_00000391	1	1	0	0
TCONS_00000392	1	1	1	1
TCONS_00000394	1	1	0	1
TCONS_00000396	1	1	1	1
TCONS_00000397	1	1	1	1
TCONS_00000400	1	1	0	0
TCONS_00000412	1	0	1	0
TCONS_00000415	1	1	0	1
TCONS_00000418	1	1	1	1
TCONS_00000425	1	1	1	1
TCONS_00000427	1	1	0	0
TCONS_00000430	1	0	1	0
TCONS_00000454	1	0	1	0
TCONS_00000458	1	0	0	1
TCONS_00000462	1	0	1	1
TCONS_00000478	1	1	0	0
TCONS_00000479	1	1	0	0
TCONS_00000482	1	1	1	1
TCONS_00000499	1	1	0	0
TCONS_00000503	1	0	1	0
TCONS_00000504	1	1	1	1
TCONS_00000511	1	1	0	0
TCONS_00000527	1	1	1	1
TCONS_00000528	1	0	1	0
TCONS_00000535	1	1	1	0
TCONS_00000560	1	1	0	0
TCONS_00000562	1	1	1	1
TCONS_00000586	1	1	0	1
TCONS_00000587	1	1	1	0
TCONS_00000588	1	1	0	1
TCONS_00000589	1	1	0	1
TCONS_00000590	1	1	0	0
TCONS_00000593	1	1	0	0
TCONS_00000595	1	1	0	0
TCONS_00000596	1	1	0	0
TCONS_00000597	1	1	0	0
TCONS_00000598	1	1	0	0
TCONS_00000601	1	1	0	1
TCONS_00000606	1	1	0	0
TCONS_00000607	1	1	0	0
TCONS_00000608	1	0	0	1
TCONS_00000618	1	1	1	1
TCONS_00000619	1	1	0	0
TCONS_00000642	1	1	0	1
TCONS_00000643	1	0	1	0
TCONS_00000644	1	1	0	0
TCONS_00000645	1	1	0	0
TCONS_00000647	1	0	1	0
TCONS_00000650	1	1	0	0
TCONS_00000655	1	0	0	1
TCONS_00000688	1	1	0	0
TCONS_00000690	1	1	0	1
TCONS_00000691	1	1	0	0
TCONS_00000699	1	1	1	0
TCONS_00000720	1	1	1	1
TCONS_00000737	1	0	1	0
TCONS_00000741	1	0	1	0
TCONS_00000755	1	0	1	0
TCONS_00000764	1	1	1	1
TCONS_00000767	1	1	1	1
TCONS_00000772	1	0	0	1
TCONS_00000773	1	0	1	0
TCONS_00000774	1	1	1	0
TCONS_00000776	1	0	1	0
TCONS_00000789	1	0	1	0
TCONS_00000791	1	0	1	0
TCONS_00000801	1	1	1	1
TCONS_00000819	1	1	0	1
TCONS_00000820	1	1	0	1
TCONS_00000821	1	1	0	1
TCONS_00000830	1	1	0	0
TCONS_00000846	1	1	0	0
TCONS_00000847	1	1	0	0
TCONS_00000857	1	1	0	1
TCONS_00000877	1	0	1	0
TCONS_00000886	1	1	0	1
TCONS_00000888	1	0	0	1
TCONS_00000891	1	1	0	0
TCONS_00000901	1	0	1	1
TCONS_00000903	1	1	1	1
TCONS_00000909	1	1	0	1
TCONS_00000910	1	1	1	1
TCONS_00000918	1	0	1	0
TCONS_00000929	1	0	1	1
TCONS_00000936	1	1	0	0
TCONS_00000947	1	0	0	1
TCONS_00000951	1	0	1	1
TCONS_00000952	1	1	1	1
TCONS_00000956	1	1	0	1
TCONS_00000964	1	1	1	0
TCONS_00000973	1	0	1	0
TCONS_00000998	1	0	1	0
TCONS_00000999	1	0	1	0
TCONS_00001000	1	1	1	1
TCONS_00001001	1	0	0	1
TCONS_00001013	1	0	1	0
TCONS_00001018	1	0	0	1
TCONS_00001019	1	0	0	1
TCONS_00001021	1	1	1	1
TCONS_00001024	1	1	0	0
TCONS_00001029	1	0	0	1
TCONS_00001030	1	1	0	0
TCONS_00001031	1	0	1	0
TCONS_00001048	1	1	0	1
TCONS_00001078	1	1	1	0
TCONS_00001085	1	1	1	1
TCONS_00001096	1	1	0	0
TCONS_00001097	1	1	1	1
TCONS_00001101	1	0	1	0
TCONS_00001124	1	0	1	0
TCONS_00001128	1	0	0	1
TCONS_00001134	1	0	0	1
TCONS_00001143	1	1	1	0
TCONS_00001152	1	1	1	0
TCONS_00001156	1	0	1	1
TCONS_00001157	1	1	1	1
TCONS_00001158	1	1	1	0
TCONS_00001159	1	1	1	1
TCONS_00001160	1	0	1	1
TCONS_00001186	1	0	1	1
TCONS_00001189	1	1	1	1
TCONS_00001193	1	1	1	1
TCONS_00001195	1	1	1	0
TCONS_00001197	1	1	0	0
TCONS_00001203	1	0	1	1
TCONS_00001204	1	0	1	0
TCONS_00001205	1	0	1	0
TCONS_00001218	1	0	0	1
TCONS_00001224	1	1	1	1
TCONS_00001237	1	0	0	1
TCONS_00001260	1	1	1	1
TCONS_00001267	1	0	0	1
TCONS_00001271	1	1	1	0
TCONS_00001287	1	1	0	1
TCONS_00001297	1	1	1	1
TCONS_00001298	1	0	0	1
TCONS_00001315	1	1	0	1
TCONS_00001324	1	1	0	1
TCONS_00001337	1	0	1	1
TCONS_00001338	1	0	1	1
TCONS_00001343	1	1	1	1
TCONS_00001347	1	1	0	0
TCONS_00001359	1	1	0	0
TCONS_00001362	1	0	1	0
TCONS_00001370	1	1	0	1
TCONS_00001387	1	1	1	1
TCONS_00001399	1	0	1	0
TCONS_00001400	1	1	0	0
TCONS_00001401	1	1	1	0
TCONS_00001403	1	1	1	1
TCONS_00001404	1	1	0	1
TCONS_00001405	1	0	1	1
TCONS_00001406	1	1	0	1
TCONS_00001408	1	1	0	0
TCONS_00001409	1	1	0	0
TCONS_00001410	1	0	0	1
TCONS_00001412	1	1	0	0
TCONS_00001417	1	0	0	1
TCONS_00001418	1	0	0	1
TCONS_00001429	1	0	1	0
TCONS_00001430	1	1	1	0
TCONS_00001432	1	0	1	0
TCONS_00001434	1	1	1	1
TCONS_00001451	1	1	1	1
TCONS_00001453	1	1	1	1
TCONS_00001456	1	1	1	1
TCONS_00001457	1	0	0	1
TCONS_00001462	1	0	1	0
TCONS_00001482	1	0	1	0
TCONS_00001487	1	0	0	1
TCONS_00001492	1	0	1	0
TCONS_00001516	1	0	1	0
TCONS_00001529	1	0	1	0
TCONS_00001531	1	1	1	1
TCONS_00001534	1	1	0	0
TCONS_00001535	1	1	1	1
TCONS_00001538	1	0	1	0
TCONS_00001575	1	0	0	1
TCONS_00001580	1	1	1	1
TCONS_00001584	1	0	0	1
TCONS_00001588	1	1	1	1
TCONS_00001594	1	0	1	0
TCONS_00001599	1	1	1	1
TCONS_00001601	1	1	1	1
TCONS_00001603	1	0	1	0
TCONS_00001621	1	1	1	1
TCONS_00001637	1	1	1	1
TCONS_00001650	1	1	0	1
TCONS_00001651	1	1	0	0
TCONS_00001657	1	1	1	0
TCONS_00001667	1	0	1	0
TCONS_00001681	1	0	1	0
TCONS_00001682	1	0	1	0
TCONS_00001683	1	0	1	0
TCONS_00001684	1	1	1	1
TCONS_00001685	1	1	0	1
TCONS_00001687	1	1	1	1
TCONS_00001688	1	1	1	1
TCONS_00001689	1	0	1	0
TCONS_00001690	1	1	0	1
TCONS_00001691	1	1	0	1
TCONS_00001692	1	1	0	0
TCONS_00001694	1	0	1	0
TCONS_00001700	1	0	0	1
TCONS_00001701	1	1	0	0
TCONS_00001702	1	1	0	0
TCONS_00001705	1	0	1	0
TCONS_00001707	1	1	0	1
TCONS_00001708	1	1	1	1
TCONS_00001709	1	0	1	0
TCONS_00001710	1	0	1	0
TCONS_00001711	1	0	1	0
TCONS_00001712	1	0	1	0
TCONS_00001713	1	0	0	1
TCONS_00001714	1	0	1	0
TCONS_00001718	1	1	0	1
TCONS_00001725	1	1	0	1
TCONS_00001744	1	0	1	0
TCONS_00001746	1	1	0	1
TCONS_00001747	1	0	1	0
TCONS_00001750	1	1	1	1
TCONS_00001754	1	0	1	0
TCONS_00001774	1	1	1	1
TCONS_00001788	1	1	1	0
TCONS_00001791	1	1	0	0
TCONS_00001792	1	1	0	0
TCONS_00001807	1	1	1	1
TCONS_00001808	1	0	1	1
TCONS_00001820	1	1	0	0
TCONS_00001821	1	1	0	0
TCONS_00001824	1	1	0	0
TCONS_00001828	1	1	0	1
TCONS_00001829	1	0	1	1
TCONS_00001830	1	1	0	0
TCONS_00001837	1	0	1	0
TCONS_00001844	1	1	1	1
TCONS_00001848	1	1	0	0
TCONS_00001853	1	1	1	1
TCONS_00001854	1	1	1	1
TCONS_00001858	1	1	1	1
TCONS_00001859	1	1	1	1
TCONS_00001869	1	1	1	1
TCONS_00001870	1	1	1	1
TCONS_00001871	1	0	1	0
TCONS_00001872	1	1	1	0
TCONS_00001885	1	1	1	0
TCONS_00001888	1	1	0	1
TCONS_00001907	1	1	0	0
TCONS_00001909	1	0	0	1
TCONS_00001916	1	1	1	1
TCONS_00001943	1	0	1	0
TCONS_00001948	1	1	0	0
TCONS_00001951	1	0	1	0
TCONS_00001956	1	0	1	0
TCONS_00001961	1	0	1	0
TCONS_00001979	1	0	1	1
TCONS_00001989	1	1	0	0
TCONS_00002029	1	0	1	1
TCONS_00002031	1	0	1	0
TCONS_00002032	1	1	1	1
TCONS_00002035	1	1	0	0
TCONS_00002039	1	0	1	0
TCONS_00002041	1	1	0	1
TCONS_00002042	1	0	0	1
TCONS_00002068	1	1	0	0
TCONS_00002099	1	1	0	1
TCONS_00002105	1	1	1	1
TCONS_00002110	1	1	0	0
TCONS_00002118	1	1	0	1
TCONS_00002137	1	0	1	0
TCONS_00002141	1	0	1	1
TCONS_00002146	1	0	1	0
TCONS_00002193	1	1	0	1
TCONS_00002194	1	1	0	1
TCONS_00002206	1	0	0	1
TCONS_00002219	1	1	1	1
TCONS_00002221	1	1	1	0
TCONS_00002222	1	0	1	0
TCONS_00002227	1	1	1	1
TCONS_00002228	1	1	1	1
TCONS_00002235	1	0	1	0
TCONS_00002243	1	1	0	0
TCONS_00002244	1	0	0	1
TCONS_00002255	1	1	1	1
TCONS_00002261	1	0	1	1
TCONS_00002263	1	0	0	1
TCONS_00002264	1	1	1	0
TCONS_00002265	1	1	1	1
TCONS_00002266	1	1	1	1
TCONS_00002273	1	0	1	0
TCONS_00002295	1	1	1	1
TCONS_00002303	1	1	0	0
TCONS_00002305	1	0	1	1
TCONS_00002313	1	0	1	0
TCONS_00002317	1	0	0	1
TCONS_00002319	1	0	1	0
TCONS_00002330	1	1	1	1
TCONS_00002349	1	1	0	0
TCONS_00002354	1	1	1	1
TCONS_00002356	1	1	0	0
TCONS_00002373	1	1	1	1
TCONS_00002381	1	1	0	1
TCONS_00002382	1	1	1	1
TCONS_00002383	1	1	1	1
TCONS_00002387	1	1	0	1
TCONS_00002389	1	1	1	1
TCONS_00002390	1	1	1	1
TCONS_00002391	1	0	1	1
TCONS_00002393	1	1	0	0
TCONS_00002395	1	0	1	0
TCONS_00002396	1	0	1	1
TCONS_00002400	1	0	1	0
TCONS_00002401	1	0	1	0
TCONS_00002404	1	0	1	0
TCONS_00002414	1	1	0	0
TCONS_00002417	1	0	0	1
TCONS_00002418	1	0	1	0
TCONS_00002420	1	0	1	0
TCONS_00002421	1	1	0	1
TCONS_00002422	1	1	0	0
TCONS_00002433	1	1	1	0
TCONS_00002435	1	1	1	0
TCONS_00002447	1	1	1	1
TCONS_00002448	1	1	1	1
TCONS_00002463	1	1	0	0
TCONS_00002464	1	1	1	1
TCONS_00002465	1	0	0	1
TCONS_00002473	1	0	1	0
TCONS_00002481	1	0	0	1
TCONS_00002487	1	1	1	1
TCONS_00002488	1	1	1	1
TCONS_00002490	1	1	1	1
TCONS_00002491	1	1	1	1
TCONS_00002493	1	1	0	0
TCONS_00002497	1	0	1	0
TCONS_00002499	1	1	0	1
TCONS_00002502	1	0	0	1
TCONS_00002503	1	0	0	1
TCONS_00002504	1	0	1	1
TCONS_00002506	1	0	1	1
TCONS_00002521	1	1	0	0
TCONS_00002526	1	1	0	0
TCONS_00002535	1	1	1	1
TCONS_00002536	1	1	0	1
TCONS_00002539	1	0	1	0
TCONS_00002546	1	0	0	1
TCONS_00002547	1	0	1	0
TCONS_00002548	1	0	1	0
TCONS_00002550	1	1	1	1
TCONS_00002551	1	1	0	0
TCONS_00002555	1	0	1	0
TCONS_00002556	1	0	1	0
TCONS_00002559	1	1	1	1
TCONS_00002565	1	0	0	1
TCONS_00002570	1	1	1	0
TCONS_00002571	1	1	0	0
TCONS_00002573	1	1	1	1
TCONS_00002574	1	1	1	0
TCONS_00002591	1	1	0	1
TCONS_00002592	1	1	0	1
TCONS_00002595	1	0	1	0
TCONS_00002596	1	0	1	0
TCONS_00002600	1	1	0	0
TCONS_00002602	1	0	1	0
TCONS_00002610	1	1	0	1
TCONS_00002616	1	1	1	0
TCONS_00002617	1	1	1	0
TCONS_00002643	1	0	0	1
TCONS_00002645	1	1	1	1
TCONS_00002646	1	1	1	1
TCONS_00002648	1	0	1	0
TCONS_00002661	1	0	0	1
TCONS_00002662	1	0	1	0
TCONS_00002665	1	1	0	0
TCONS_00002715	1	0	1	0
TCONS_00002716	1	0	1	0
TCONS_00002726	1	0	0	1
TCONS_00002735	1	0	1	0
TCONS_00002748	1	1	1	1
TCONS_00002749	1	0	1	0
TCONS_00002766	1	0	1	0
TCONS_00002767	1	1	1	1
TCONS_00002789	1	1	0	1
TCONS_00002790	1	1	0	1
TCONS_00002791	1	1	0	1
TCONS_00002795	1	1	1	1
TCONS_00002810	1	1	1	0
TCONS_00002811	1	1	1	0
TCONS_00002812	1	1	0	0
TCONS_00002815	1	0	1	1
TCONS_00002817	1	1	0	1
TCONS_00002833	1	0	1	0
TCONS_00002837	1	0	1	0
TCONS_00002838	1	0	1	0
TCONS_00002843	1	0	1	0
TCONS_00002857	1	0	1	0
TCONS_00002888	1	1	1	1
TCONS_00002899	1	0	1	0
TCONS_00002926	1	1	0	1
TCONS_00002947	1	0	1	0
TCONS_00002948	1	1	0	1
TCONS_00002949	1	0	1	0
TCONS_00002953	1	1	1	0
TCONS_00002954	1	0	1	0
TCONS_00002957	1	0	1	0
TCONS_00002959	1	1	0	0
TCONS_00002968	1	0	1	0
TCONS_00002969	1	1	0	1
TCONS_00002970	1	1	1	1
TCONS_00002977	1	1	1	1
TCONS_00002979	1	1	1	1
TCONS_00002997	1	0	1	0
TCONS_00002998	1	0	1	0
TCONS_00003012	1	1	1	0
TCONS_00003025	1	0	1	0
TCONS_00003031	1	0	1	0
TCONS_00003046	1	0	1	0
TCONS_00003062	1	1	0	0
TCONS_00003069	1	0	1	0
TCONS_00003071	1	0	1	0
TCONS_00003073	1	0	1	0
TCONS_00003076	1	0	0	1
TCONS_00003084	1	0	1	0
TCONS_00003085	1	0	1	0
TCONS_00003088	1	1	1	1
TCONS_00003096	1	1	1	1
TCONS_00003097	1	0	1	0
TCONS_00003098	1	1	1	1
TCONS_00003109	1	1	1	1
TCONS_00003134	1	1	0	1
TCONS_00003137	1	0	1	0
TCONS_00003155	1	1	0	1
TCONS_00003159	1	0	1	1
TCONS_00003160	1	0	1	0
TCONS_00003161	1	0	0	1
TCONS_00003168	1	1	0	0
TCONS_00003169	1	1	1	0
TCONS_00003170	1	1	1	1
TCONS_00003172	1	1	0	0
TCONS_00003175	1	0	1	0
TCONS_00003178	1	0	1	0
TCONS_00003182	1	0	1	0
TCONS_00003198	1	0	1	0
TCONS_00003204	1	1	0	1
TCONS_00003223	1	0	1	0
TCONS_00003224	1	0	1	0
TCONS_00003226	1	1	1	0
TCONS_00003230	1	0	0	1
TCONS_00003232	1	0	1	1
TCONS_00003237	1	0	0	1
TCONS_00003238	1	1	0	0
TCONS_00003239	1	1	1	1
TCONS_00003246	1	1	1	0
TCONS_00003251	1	0	1	0
TCONS_00003252	1	0	1	0
TCONS_00003253	1	0	1	0
TCONS_00003255	1	1	1	0
TCONS_00003258	1	0	1	0
TCONS_00003259	1	0	1	0
TCONS_00003261	1	0	1	0
TCONS_00003292	1	1	1	1
TCONS_00003294	1	1	0	0
TCONS_00003295	1	1	1	1
TCONS_00003296	1	0	0	1
TCONS_00003297	1	1	1	1
TCONS_00003298	1	1	1	1
TCONS_00003299	1	1	1	1
TCONS_00003300	1	1	0	0
TCONS_00003302	1	0	1	0
TCONS_00003303	1	0	1	0
TCONS_00003314	1	1	1	1
TCONS_00003316	1	0	0	1
TCONS_00003323	1	1	1	0
TCONS_00003338	1	0	0	1
TCONS_00003343	1	1	1	1
TCONS_00003351	1	1	1	1
TCONS_00003364	1	1	1	1
TCONS_00003370	1	1	0	1
TCONS_00003392	1	1	0	1
TCONS_00003393	1	1	1	1
TCONS_00003411	1	0	1	0
TCONS_00003417	1	0	1	0
TCONS_00003421	1	1	0	1
TCONS_00003422	1	0	0	1
TCONS_00003425	1	0	1	0
TCONS_00003435	1	1	0	0
TCONS_00003440	1	1	1	1
TCONS_00003447	1	0	1	0
TCONS_00003448	1	1	1	1
TCONS_00003449	1	1	1	1
TCONS_00003454	1	1	0	0
TCONS_00003455	1	1	1	1
TCONS_00003457	1	0	0	1
TCONS_00003458	1	0	0	1
TCONS_00003459	1	1	1	1
TCONS_00003460	1	1	1	1
TCONS_00003463	1	1	1	0
TCONS_00003464	1	0	1	0
TCONS_00003466	1	1	1	1
TCONS_00003477	1	0	1	0
TCONS_00003490	1	1	0	0
TCONS_00003491	1	1	1	1
TCONS_00003497	1	1	1	1
TCONS_00003498	1	0	1	0
TCONS_00003506	1	0	1	0
TCONS_00003515	1	1	1	0
TCONS_00003537	1	1	0	1
TCONS_00003543	1	1	0	0
TCONS_00003548	1	1	1	1
TCONS_00003549	1	1	1	1
TCONS_00003550	1	0	1	0
TCONS_00003551	1	1	1	0
TCONS_00003555	1	1	1	1
TCONS_00003556	1	0	1	0
TCONS_00003564	1	1	1	0
TCONS_00003565	1	1	0	0
TCONS_00003567	1	1	0	0
TCONS_00003569	1	0	1	0
TCONS_00003570	1	0	1	1
TCONS_00003580	1	1	1	0
TCONS_00003595	1	1	0	1
TCONS_00003608	1	1	0	0
TCONS_00003616	1	1	1	0
TCONS_00003619	1	0	0	1
TCONS_00003625	1	0	1	0
TCONS_00003628	1	0	1	0
TCONS_00003637	1	1	0	0
TCONS_00003641	1	0	1	1
TCONS_00003644	1	1	1	1
TCONS_00003645	1	1	0	1
TCONS_00003646	1	1	1	0
TCONS_00003648	1	1	1	1
TCONS_00003654	1	1	1	0
TCONS_00003657	1	0	1	0
TCONS_00003662	1	1	1	1
TCONS_00003666	1	0	1	0
TCONS_00003668	1	0	1	1
TCONS_00003674	1	1	0	1
TCONS_00003680	1	0	0	1
TCONS_00003688	1	1	1	1
TCONS_00003698	1	1	1	0
TCONS_00003699	1	1	0	0
TCONS_00003708	1	1	0	1
TCONS_00003714	1	0	1	0
TCONS_00003717	1	0	1	0
TCONS_00003725	1	1	0	1
TCONS_00003726	1	1	1	1
TCONS_00003727	1	1	0	1
TCONS_00003733	1	0	1	0
TCONS_00003743	1	0	1	0
TCONS_00003753	1	1	1	1
TCONS_00003757	1	0	0	1
TCONS_00003758	1	1	1	1
TCONS_00003760	1	0	1	0
TCONS_00003763	1	0	1	0
TCONS_00003767	1	0	1	0
TCONS_00003801	1	0	0	1
TCONS_00003803	1	1	0	0
TCONS_00003807	1	1	1	1
TCONS_00003809	1	1	1	0
TCONS_00003810	1	0	1	0
TCONS_00003811	1	0	1	1
TCONS_00003813	1	0	1	0
TCONS_00003815	1	0	1	0
TCONS_00003816	1	0	1	0
TCONS_00003819	1	1	1	1
TCONS_00003821	1	1	0	1
TCONS_00003826	1	0	1	0
TCONS_00003827	1	0	1	0
TCONS_00003828	1	1	0	0
TCONS_00003829	1	1	1	0
TCONS_00003837	1	1	1	0
TCONS_00003841	1	1	1	1
TCONS_00003843	1	1	1	0
TCONS_00003858	1	1	1	0
TCONS_00003859	1	0	1	1
TCONS_00003880	1	0	0	1
TCONS_00003881	1	1	0	0
TCONS_00003888	1	0	1	0
TCONS_00003901	1	1	0	0
TCONS_00003919	1	1	0	0
TCONS_00003920	1	1	0	0
TCONS_00003921	1	0	1	0
TCONS_00003923	1	1	0	0
TCONS_00003924	1	1	1	1
TCONS_00003925	1	1	1	1
TCONS_00003926	1	1	0	0
TCONS_00003927	1	1	1	1
TCONS_00003929	1	0	0	1
TCONS_00003936	1	1	1	0
TCONS_00003939	1	0	1	0
TCONS_00003958	1	0	1	0
TCONS_00003959	1	0	1	0
TCONS_00003961	1	1	1	0
TCONS_00003962	1	0	0	1
TCONS_00003963	1	1	0	1
TCONS_00003964	1	1	0	1
TCONS_00003971	1	1	1	1
TCONS_00003972	1	1	1	1
TCONS_00003973	1	0	1	0
TCONS_00003977	1	1	1	1
TCONS_00003979	1	0	1	1
TCONS_00003980	1	1	1	0
TCONS_00003983	1	0	0	1
TCONS_00003985	1	0	1	0
TCONS_00003986	1	1	1	1
TCONS_00003992	1	0	1	0
TCONS_00003994	1	0	1	0
TCONS_00004010	1	0	0	1
TCONS_00004022	1	1	1	1
TCONS_00004025	1	1	1	1
TCONS_00004030	1	0	0	1
TCONS_00004041	1	0	1	0
TCONS_00004046	1	1	0	1
TCONS_00004047	1	1	1	0
TCONS_00004052	1	0	1	0
TCONS_00004057	1	1	0	1
TCONS_00004063	1	1	1	1
TCONS_00004072	1	1	0	0
TCONS_00004089	1	0	1	0
TCONS_00004090	1	1	1	1
TCONS_00004092	1	1	1	0
TCONS_00004094	1	1	1	1
TCONS_00004095	1	1	1	1
TCONS_00004096	1	1	0	1
TCONS_00004097	1	0	1	0
TCONS_00004101	1	1	0	1
TCONS_00004128	1	0	1	0
TCONS_00004132	1	0	0	1
TCONS_00004134	1	1	0	0
TCONS_00004135	1	1	0	0
TCONS_00004137	1	0	1	0
TCONS_00004142	1	1	0	0
TCONS_00004144	1	1	0	1
TCONS_00004146	1	0	1	1
TCONS_00004165	1	0	1	0
TCONS_00004168	1	0	1	1
TCONS_00004169	1	1	0	1
TCONS_00004171	1	0	0	1
TCONS_00004183	1	1	0	0
TCONS_00004187	1	1	0	0
TCONS_00004196	1	1	1	1
TCONS_00004204	1	1	1	1
TCONS_00004207	1	1	0	0
TCONS_00004210	1	1	1	0
TCONS_00004212	1	1	1	1
TCONS_00004214	1	0	1	1
TCONS_00004216	1	1	1	1
TCONS_00004217	1	0	0	1
TCONS_00004221	1	0	1	0
TCONS_00004222	1	1	0	0
TCONS_00004223	1	0	1	0
TCONS_00004239	1	0	1	0
TCONS_00004243	1	1	0	1
TCONS_00004244	1	0	1	0
TCONS_00004248	1	1	0	0
TCONS_00004249	1	1	1	0
TCONS_00004261	1	0	1	0
TCONS_00004262	1	0	0	1
TCONS_00004267	1	0	1	0
TCONS_00004271	1	1	1	0
TCONS_00004273	1	0	1	0
TCONS_00004275	1	0	1	1
TCONS_00004276	1	0	1	1
TCONS_00004281	1	0	0	1
TCONS_00004287	1	1	1	0
TCONS_00004288	1	0	1	1
TCONS_00004292	1	0	1	0
TCONS_00004304	1	0	1	0
TCONS_00004305	1	0	0	1
TCONS_00004308	1	0	1	0
TCONS_00004310	1	0	0	1
TCONS_00004324	1	0	1	0
TCONS_00004329	1	1	1	1
TCONS_00004332	1	0	1	0
TCONS_00004351	1	1	0	0
TCONS_00004357	1	0	1	0
TCONS_00004360	1	1	1	1
TCONS_00004362	1	1	1	0
TCONS_00004363	1	1	1	1
TCONS_00004364	1	1	1	1
TCONS_00004369	1	1	1	1
TCONS_00004387	1	1	1	1
TCONS_00004395	1	0	1	0
TCONS_00004407	1	0	1	0
TCONS_00004412	1	1	1	1
TCONS_00004413	1	1	0	1
TCONS_00004417	1	0	1	0
TCONS_00004423	1	1	0	1
TCONS_00004435	1	0	1	0
TCONS_00004436	1	0	1	0
TCONS_00004451	1	1	1	1
TCONS_00004456	1	1	0	0
TCONS_00004457	1	1	0	0
TCONS_00004484	1	1	1	1
TCONS_00004494	1	1	1	1
TCONS_00004495	1	0	0	1
TCONS_00004497	1	0	0	1
TCONS_00004498	1	0	0	1
TCONS_00004500	1	0	0	1
TCONS_00004501	1	0	0	1
TCONS_00004506	1	0	0	1
TCONS_00004535	1	1	0	0
TCONS_00004537	1	1	0	0
TCONS_00004552	1	0	1	0
TCONS_00004553	1	1	0	0
TCONS_00004556	1	0	1	0
TCONS_00004559	1	0	1	1
TCONS_00004560	1	1	0	0
TCONS_00004580	1	1	0	0
TCONS_00004597	1	0	1	0
TCONS_00004603	1	1	1	1
TCONS_00004606	1	0	1	1
TCONS_00004607	1	1	1	1
TCONS_00004613	1	1	0	1
TCONS_00004614	1	1	1	1
TCONS_00004616	1	0	0	1
TCONS_00004617	1	0	1	1
TCONS_00004618	1	1	1	1
TCONS_00004621	1	1	0	1
TCONS_00004623	1	0	1	1
TCONS_00004628	1	1	1	1
TCONS_00004639	1	1	1	1
TCONS_00004645	1	0	0	1
TCONS_00004652	1	0	1	1
TCONS_00004653	1	0	1	1
TCONS_00004657	1	0	1	0
TCONS_00004658	1	0	0	1
TCONS_00004659	1	0	0	1
TCONS_00004660	1	0	1	0
TCONS_00004661	1	1	1	1
TCONS_00004665	1	1	1	0
TCONS_00004680	1	0	1	0
TCONS_00004684	1	0	1	0
TCONS_00004693	1	0	1	0
TCONS_00004700	1	0	1	1
TCONS_00004701	1	1	1	1
TCONS_00004721	1	0	1	0
TCONS_00004723	1	1	1	1
TCONS_00004724	1	1	1	1
TCONS_00004727	1	1	0	1
TCONS_00004734	1	1	1	1
TCONS_00004736	1	0	0	1
TCONS_00004740	1	1	0	0
TCONS_00004742	1	1	0	0
TCONS_00004744	1	1	0	0
TCONS_00004747	1	0	1	0
TCONS_00004750	1	1	0	0
TCONS_00004759	1	0	1	0
TCONS_00004762	1	0	1	0
TCONS_00004765	1	1	1	1
TCONS_00004768	1	1	0	0
TCONS_00004784	1	1	1	1
TCONS_00004791	1	0	1	0
TCONS_00004793	1	0	1	0
TCONS_00004797	1	0	1	0
TCONS_00004798	1	1	1	0
TCONS_00004807	1	1	0	0
TCONS_00004808	1	1	1	0
TCONS_00004810	1	0	1	0
TCONS_00004812	1	0	1	1
TCONS_00004817	1	1	1	0
TCONS_00004818	1	1	1	1
TCONS_00004819	1	0	0	1
TCONS_00004820	1	1	0	1
TCONS_00004821	1	1	1	0
TCONS_00004822	1	1	0	1
TCONS_00004823	1	1	1	1
TCONS_00004825	1	0	0	1
TCONS_00004828	1	1	0	0
TCONS_00004829	1	1	0	0
TCONS_00004831	1	1	0	0
TCONS_00004832	1	1	0	0
TCONS_00004833	1	0	1	1
TCONS_00004838	1	0	1	0
TCONS_00004839	1	1	1	1
TCONS_00004857	1	0	1	0
TCONS_00004866	1	0	1	0
TCONS_00004867	1	0	1	0
TCONS_00004869	1	0	1	0
TCONS_00004870	1	0	1	0
TCONS_00004873	1	0	0	1
TCONS_00004874	1	0	0	1
TCONS_00004878	1	0	1	0
TCONS_00004887	1	1	0	0
TCONS_00004888	1	0	1	0
TCONS_00004891	1	0	0	1
TCONS_00004894	1	0	0	1
TCONS_00004895	1	0	0	1
TCONS_00004897	1	0	0	1
TCONS_00004903	1	1	0	0
TCONS_00004937	1	0	0	1
TCONS_00004938	1	1	0	1
TCONS_00004939	1	1	0	1
TCONS_00004940	1	1	0	1
TCONS_00004943	1	1	1	1
TCONS_00004944	1	1	1	1
TCONS_00004945	1	1	1	1
TCONS_00004951	1	0	1	0
TCONS_00004960	1	0	1	1
TCONS_00004961	1	1	1	1
TCONS_00004978	1	1	0	1
TCONS_00004982	1	1	0	0
TCONS_00004988	1	0	0	1
TCONS_00004989	1	0	1	0
TCONS_00004991	1	0	1	1
TCONS_00004993	1	1	1	0
TCONS_00004995	1	1	1	0
TCONS_00004997	1	1	0	1
TCONS_00004998	1	1	1	1
TCONS_00005011	1	1	1	1
TCONS_00005033	1	0	1	0
TCONS_00005043	1	1	1	1
TCONS_00005047	1	1	0	0
TCONS_00005048	1	1	1	1
TCONS_00005052	1	1	0	0
TCONS_00005054	1	1	0	0
TCONS_00005068	1	1	1	1
TCONS_00005084	1	1	0	0
TCONS_00005086	1	0	1	0
TCONS_00005094	1	0	1	1
TCONS_00005095	1	0	1	1
TCONS_00005100	1	0	1	0
TCONS_00005116	1	1	0	1
TCONS_00005120	1	0	1	0
TCONS_00005162	1	1	1	1
TCONS_00005163	1	1	1	0
TCONS_00005164	1	1	1	0
TCONS_00005167	1	0	1	1
TCONS_00005178	1	1	1	0
TCONS_00005215	1	0	1	0
TCONS_00005220	1	1	1	0
TCONS_00005223	1	0	1	0
TCONS_00005238	1	1	1	1
TCONS_00005239	1	1	0	0
TCONS_00005241	1	0	1	0
TCONS_00005243	1	1	1	0
TCONS_00005248	1	0	1	0
TCONS_00005249	1	1	1	0
TCONS_00005253	1	0	0	1
TCONS_00005261	1	1	0	0
TCONS_00005271	1	1	0	0
TCONS_00005278	1	1	1	0
TCONS_00005279	1	1	1	0
TCONS_00005286	1	1	0	0
TCONS_00005293	1	0	0	1
TCONS_00005294	1	1	1	1
TCONS_00005302	1	0	0	1
TCONS_00005306	1	1	1	0
TCONS_00005313	1	1	1	0
TCONS_00005317	1	1	1	1
TCONS_00005320	1	1	1	1
TCONS_00005323	1	1	1	1
TCONS_00005324	1	0	1	0
TCONS_00005325	1	0	1	1
TCONS_00005327	1	0	1	0
TCONS_00005328	1	0	1	0
TCONS_00005349	1	0	0	1
TCONS_00005350	1	0	0	1
TCONS_00005355	1	0	1	1
TCONS_00005357	1	1	0	0
TCONS_00005358	1	1	1	1
TCONS_00005364	1	0	1	0
TCONS_00005367	1	1	0	0
TCONS_00005389	1	0	0	1
TCONS_00005392	1	1	0	0
TCONS_00005393	1	1	0	1
TCONS_00005394	1	1	0	0
TCONS_00005396	1	1	0	0
TCONS_00005397	1	1	0	1
TCONS_00005399	1	1	1	1
TCONS_00005415	1	0	1	0
TCONS_00005425	1	0	0	1
TCONS_00005427	1	0	1	0
TCONS_00005441	1	1	1	1
TCONS_00005443	1	1	1	1
TCONS_00005444	1	1	1	1
TCONS_00005482	1	1	1	1
TCONS_00005495	1	0	1	0
TCONS_00005496	1	0	1	0
TCONS_00005501	1	0	1	0
TCONS_00005503	1	1	1	1
TCONS_00005505	1	1	0	0
TCONS_00005508	1	1	0	1
TCONS_00005515	1	0	0	1
TCONS_00005516	1	0	1	0
TCONS_00005517	1	1	1	0
TCONS_00005521	1	1	0	1
TCONS_00005544	1	1	0	1
TCONS_00005545	1	1	0	0
TCONS_00005548	1	0	1	0
TCONS_00005552	1	0	1	0
TCONS_00005562	1	1	1	1
TCONS_00005563	1	0	0	1
TCONS_00005573	1	0	1	0
TCONS_00005585	1	0	0	1
TCONS_00005609	1	0	1	0
TCONS_00005610	1	0	1	0
TCONS_00005624	1	1	1	1
TCONS_00005627	1	1	1	0
TCONS_00005632	1	1	0	0
TCONS_00005634	1	1	0	0
TCONS_00005644	1	0	1	1
TCONS_00005647	1	0	1	0
TCONS_00005656	1	1	1	1
TCONS_00005657	1	0	1	1
TCONS_00005658	1	1	1	1
TCONS_00005659	1	1	1	1
TCONS_00005661	1	0	1	1
TCONS_00005662	1	0	1	1
TCONS_00005670	1	0	1	0
TCONS_00005671	1	0	1	0
TCONS_00005672	1	0	1	0
TCONS_00005704	1	0	1	1
TCONS_00005721	1	0	1	0
TCONS_00005725	1	0	1	0
TCONS_00005729	1	1	1	1
TCONS_00005730	1	0	0	1
TCONS_00005740	1	1	0	0
TCONS_00005751	1	0	1	0
TCONS_00005752	1	0	1	1
TCONS_00005753	1	1	1	1
TCONS_00005754	1	1	1	1
TCONS_00005755	1	0	1	0
TCONS_00005756	1	1	0	1
TCONS_00005757	1	0	0	1
TCONS_00005764	1	1	0	1
TCONS_00005773	1	1	1	1
TCONS_00005778	1	0	1	0
TCONS_00005781	1	0	1	0
TCONS_00005796	1	0	1	0
TCONS_00005826	1	1	1	0
TCONS_00005863	1	0	1	0
TCONS_00005876	1	0	1	0
TCONS_00005929	1	0	1	0
TCONS_00005938	1	1	1	0
TCONS_00005949	1	0	1	0
TCONS_00005979	1	0	1	0
TCONS_00006003	1	0	1	0
TCONS_00006007	1	0	1	0
TCONS_00006009	1	0	1	0
TCONS_00006062	1	0	1	0
TCONS_00006066	1	1	1	1
TCONS_00006069	1	1	1	0
TCONS_00006085	1	0	1	0
TCONS_00006186	1	1	0	0
TCONS_00006194	1	0	1	0
TCONS_00006196	1	0	1	0
TCONS_00006201	1	0	1	0
TCONS_00006208	1	1	1	1
TCONS_00006211	1	0	1	0
TCONS_00006214	1	0	1	0
TCONS_00006219	1	0	1	0
TCONS_00006246	1	0	1	0
TCONS_00006247	1	1	0	0
TCONS_00006252	1	0	1	0
TCONS_00006280	1	0	1	0
TCONS_00006282	1	1	0	1
TCONS_00006294	1	1	1	1
TCONS_00006352	1	0	1	0
TCONS_00006357	1	1	0	0
TCONS_00006378	1	0	1	0
TCONS_00006421	1	0	1	0
TCONS_00006436	1	1	1	1
TCONS_00006450	1	0	1	0
TCONS_00006471	1	0	1	0
TCONS_00006474	1	0	1	1
TCONS_00006475	1	1	1	1
TCONS_00006479	1	1	1	1
TCONS_00006488	1	1	1	1
TCONS_00006494	1	1	1	0
TCONS_00006506	1	1	0	0
TCONS_00006558	1	0	1	0
TCONS_00006570	1	1	0	0
TCONS_00006593	1	1	1	1
TCONS_00006605	1	0	1	0
TCONS_00006618	1	0	1	0
TCONS_00006619	1	0	1	0
TCONS_00006632	1	0	1	0
TCONS_00006659	0	1	1	0
TCONS_00006667	0	1	1	0
TCONS_00006672	0	1	0	1
TCONS_00006674	0	1	0	1
TCONS_00006684	0	1	0	1
TCONS_00006696	0	1	1	0
TCONS_00006709	0	1	0	1
TCONS_00006710	0	1	0	1
TCONS_00006716	0	1	1	1
TCONS_00006718	0	1	0	1
TCONS_00006719	0	1	0	1
TCONS_00006721	0	1	0	1
TCONS_00006735	0	1	1	0
TCONS_00006736	0	1	1	0
TCONS_00006744	0	1	1	1
TCONS_00006745	0	1	1	1
TCONS_00006749	0	1	1	1
TCONS_00006780	0	1	0	1
TCONS_00006799	0	1	0	1
TCONS_00006818	0	1	0	1
TCONS_00006819	0	1	0	1
TCONS_00006823	0	1	0	1
TCONS_00006824	0	1	0	1
TCONS_00006830	0	1	1	0
TCONS_00006836	0	1	1	1
TCONS_00006838	0	1	1	0
TCONS_00006852	0	1	0	1
TCONS_00006860	0	1	0	1
TCONS_00006880	0	1	1	1
TCONS_00006881	0	1	1	1
TCONS_00006883	0	1	1	1
TCONS_00006885	0	1	0	1
TCONS_00006886	0	1	0	1
TCONS_00006888	0	1	1	1
TCONS_00006889	0	1	1	1
TCONS_00006893	0	1	1	1
TCONS_00006894	0	1	1	1
TCONS_00006934	0	1	1	1
TCONS_00006935	0	1	1	1
TCONS_00006941	0	1	0	1
TCONS_00006949	0	1	0	1
TCONS_00006964	0	1	1	0
TCONS_00006993	0	1	1	1
TCONS_00006999	0	1	0	1
TCONS_00007015	0	1	1	1
TCONS_00007029	0	1	0	1
TCONS_00007030	0	1	0	1
TCONS_00007054	0	1	1	0
TCONS_00007057	0	1	0	1
TCONS_00007059	0	1	0	1
TCONS_00007060	0	1	0	1
TCONS_00007064	0	1	0	1
TCONS_00007091	0	1	0	1
TCONS_00007092	0	1	0	1
TCONS_00007095	0	1	1	0
TCONS_00007111	0	1	0	1
TCONS_00007124	0	1	1	0
TCONS_00007136	0	1	0	1
TCONS_00007149	0	1	0	1
TCONS_00007152	0	1	0	1
TCONS_00007156	0	1	0	1
TCONS_00007164	0	1	0	1
TCONS_00007175	0	1	1	0
TCONS_00007189	0	1	0	1
TCONS_00007206	0	1	1	1
TCONS_00007211	0	1	1	0
TCONS_00007212	0	1	0	1
TCONS_00007213	0	1	0	1
TCONS_00007216	0	1	0	1
TCONS_00007227	0	1	0	1
TCONS_00007237	0	1	1	1
TCONS_00007239	0	1	1	1
TCONS_00007240	0	1	1	1
TCONS_00007241	0	1	1	1
TCONS_00007246	0	1	1	1
TCONS_00007269	0	1	1	1
TCONS_00007270	0	1	1	1
TCONS_00007271	0	1	1	0
TCONS_00007272	0	1	1	0
TCONS_00007275	0	1	1	0
TCONS_00007284	0	1	1	0
TCONS_00007288	0	1	1	0
TCONS_00007296	0	1	0	1
TCONS_00007297	0	1	0	1
TCONS_00007344	0	1	0	1
TCONS_00007359	0	1	1	1
TCONS_00007379	0	1	0	1
TCONS_00007387	0	1	1	1
TCONS_00007388	0	1	1	1
TCONS_00007393	0	1	1	1
TCONS_00007397	0	1	0	1
TCONS_00007403	0	1	0	1
TCONS_00007408	0	1	0	1
TCONS_00007472	0	1	0	1
TCONS_00007474	0	1	0	1
TCONS_00007489	0	1	0	1
TCONS_00007504	0	1	0	1
TCONS_00007507	0	1	0	1
TCONS_00007509	0	1	1	0
TCONS_00007514	0	1	0	1
TCONS_00007519	0	1	0	1
TCONS_00007529	0	1	0	1
TCONS_00007536	0	1	0	1
TCONS_00007550	0	1	0	1
TCONS_00007566	0	1	0	1
TCONS_00007578	0	1	1	1
TCONS_00007587	0	1	0	1
TCONS_00007588	0	1	1	0
TCONS_00007596	0	1	0	1
TCONS_00007617	0	1	1	0
TCONS_00007619	0	1	1	0
TCONS_00007620	0	1	1	1
TCONS_00007624	0	1	0	1
TCONS_00007625	0	1	1	1
TCONS_00007656	0	1	0	1
TCONS_00007659	0	1	0	1
TCONS_00007660	0	1	0	1
TCONS_00007661	0	1	0	1
TCONS_00007668	0	1	0	1
TCONS_00007676	0	1	0	1
TCONS_00007694	0	1	0	1
TCONS_00007699	0	1	0	1
TCONS_00007703	0	1	0	1
TCONS_00007711	0	1	0	1
TCONS_00007716	0	1	0	1
TCONS_00007729	0	1	1	1
TCONS_00007735	0	1	1	0
TCONS_00007742	0	1	1	0
TCONS_00007746	0	1	0	1
TCONS_00007755	0	1	0	1
TCONS_00007759	0	1	0	1
TCONS_00007761	0	1	0	1
TCONS_00007767	0	1	1	1
TCONS_00007768	0	1	1	1
TCONS_00007826	0	1	0	1
TCONS_00007830	0	1	0	1
TCONS_00007852	0	1	1	0
TCONS_00007874	0	1	1	1
TCONS_00007886	0	1	1	0
TCONS_00007890	0	1	0	1
TCONS_00007901	0	1	0	1
TCONS_00007902	0	1	0	1
TCONS_00007916	0	1	1	1
TCONS_00007950	0	1	0	1
TCONS_00007967	0	1	1	0
TCONS_00007971	0	1	0	1
TCONS_00007972	0	1	1	1
TCONS_00007976	0	1	1	1
TCONS_00007978	0	1	1	0
TCONS_00007983	0	1	1	0
TCONS_00007998	0	1	0	1
TCONS_00008002	0	1	1	1
TCONS_00008004	0	1	0	1
TCONS_00008005	0	1	1	1
TCONS_00008010	0	1	0	1
TCONS_00008012	0	1	0	1
TCONS_00008013	0	1	0	1
TCONS_00008033	0	1	0	1
TCONS_00008035	0	1	1	0
TCONS_00008038	0	1	0	1
TCONS_00008042	0	1	0	1
TCONS_00008043	0	1	1	1
TCONS_00008047	0	1	0	1
TCONS_00008048	0	1	0	1
TCONS_00008052	0	1	0	1
TCONS_00008054	0	1	0	1
TCONS_00008059	0	1	1	0
TCONS_00008063	0	1	1	0
TCONS_00008071	0	1	1	1
TCONS_00008073	0	1	1	0
TCONS_00008102	0	1	1	0
TCONS_00008103	0	1	1	0
TCONS_00008111	0	1	1	0
TCONS_00008115	0	1	0	1
TCONS_00008122	0	1	0	1
TCONS_00008125	0	1	1	1
TCONS_00008128	0	1	1	0
TCONS_00008133	0	1	1	0
TCONS_00008142	0	1	1	0
TCONS_00008154	0	1	1	0
TCONS_00008175	0	1	0	1
TCONS_00008179	0	1	1	0
TCONS_00008193	0	1	0	1
TCONS_00008194	0	1	1	0
TCONS_00008227	0	1	1	0
TCONS_00008233	0	1	1	1
TCONS_00008271	0	1	1	0
TCONS_00008301	0	1	1	0
TCONS_00008302	0	1	1	0
TCONS_00008303	0	1	0	1
TCONS_00008335	0	1	1	0
TCONS_00008355	0	1	0	1
TCONS_00008372	0	1	0	1
TCONS_00008412	0	1	1	1
TCONS_00008430	0	1	0	1
TCONS_00008437	0	1	0	1
TCONS_00008454	0	1	1	1
TCONS_00008457	0	1	0	1
TCONS_00008471	0	1	1	1
TCONS_00008482	0	1	1	0
TCONS_00008486	0	1	0	1
TCONS_00008490	0	1	1	1
TCONS_00008491	0	1	1	1
TCONS_00008497	0	1	1	0
TCONS_00008501	0	1	1	1
TCONS_00008504	0	1	1	0
TCONS_00008512	0	1	1	0
TCONS_00008521	0	1	1	0
TCONS_00008522	0	1	1	1
TCONS_00008546	0	1	1	1
TCONS_00008554	0	1	0	1
TCONS_00008570	0	1	1	0
TCONS_00008587	0	1	1	1
TCONS_00008588	0	1	0	1
TCONS_00008596	0	1	0	1
TCONS_00008597	0	1	1	0
TCONS_00008603	0	1	1	1
TCONS_00008606	0	1	1	1
TCONS_00008613	0	1	1	1
TCONS_00008618	0	1	1	0
TCONS_00008622	0	1	1	0
TCONS_00008636	0	1	0	1
TCONS_00008637	0	1	0	1
TCONS_00008639	0	1	1	1
TCONS_00008644	0	1	0	1
TCONS_00008656	0	1	1	0
TCONS_00008663	0	1	0	1
TCONS_00008669	0	1	1	1
TCONS_00008689	0	1	1	0
TCONS_00008690	0	1	1	1
TCONS_00008696	0	1	0	1
TCONS_00008714	0	1	1	0
TCONS_00008724	0	1	1	0
TCONS_00008731	0	1	0	1
TCONS_00008740	0	1	0	1
TCONS_00008752	0	1	0	1
TCONS_00008758	0	1	1	1
TCONS_00008765	0	1	0	1
TCONS_00008767	0	1	1	0
TCONS_00008768	0	1	1	1
TCONS_00008769	0	1	1	1
TCONS_00008770	0	1	0	1
TCONS_00008778	0	1	0	1
TCONS_00008783	0	1	1	0
TCONS_00008786	0	1	1	1
TCONS_00008810	0	1	1	0
TCONS_00008812	0	1	1	0
TCONS_00008815	0	1	1	0
TCONS_00008818	0	1	0	1
TCONS_00008819	0	1	0	1
TCONS_00008838	0	1	0	1
TCONS_00008844	0	1	0	1
TCONS_00008845	0	1	0	1
TCONS_00008848	0	1	0	1
TCONS_00008853	0	1	1	0
TCONS_00008858	0	1	0	1
TCONS_00008859	0	1	1	1
TCONS_00008868	0	1	0	1
TCONS_00008872	0	1	0	1
TCONS_00008894	0	1	0	1
TCONS_00008901	0	1	0	1
TCONS_00008903	0	1	0	1
TCONS_00008920	0	1	1	1
TCONS_00008921	0	1	0	1
TCONS_00008924	0	1	0	1
TCONS_00008925	0	1	0	1
TCONS_00008938	0	1	1	0
TCONS_00008939	0	1	1	1
TCONS_00008944	0	1	0	1
TCONS_00008950	0	1	0	1
TCONS_00008952	0	1	0	1
TCONS_00008972	0	1	0	1
TCONS_00008979	0	1	0	1
TCONS_00008985	0	1	0	1
TCONS_00008987	0	1	0	1
TCONS_00008993	0	1	0	1
TCONS_00008999	0	1	1	0
TCONS_00009023	0	1	1	0
TCONS_00009036	0	1	1	1
TCONS_00009040	0	1	0	1
TCONS_00009043	0	1	0	1
TCONS_00009044	0	1	0	1
TCONS_00009066	0	1	0	1
TCONS_00009069	0	1	0	1
TCONS_00009070	0	1	0	1
TCONS_00009076	0	1	0	1
TCONS_00009080	0	1	0	1
TCONS_00009090	0	1	0	1
TCONS_00009093	0	1	0	1
TCONS_00009095	0	1	0	1
TCONS_00009098	0	1	0	1
TCONS_00009105	0	1	0	1
TCONS_00009106	0	1	1	1
TCONS_00009108	0	1	0	1
TCONS_00009113	0	1	0	1
TCONS_00009116	0	1	0	1
TCONS_00009124	0	1	0	1
TCONS_00009125	0	1	0	1
TCONS_00009127	0	1	0	1
TCONS_00009128	0	1	0	1
TCONS_00009129	0	1	0	1
TCONS_00009130	0	1	0	1
TCONS_00009132	0	1	1	1
TCONS_00009146	0	1	1	0
TCONS_00009160	0	1	1	0
TCONS_00009175	0	1	0	1
TCONS_00009181	0	1	1	1
TCONS_00009185	0	1	1	1
TCONS_00009189	0	1	1	1
TCONS_00009195	0	1	0	1
TCONS_00009202	0	1	1	0
TCONS_00009222	0	1	1	0
TCONS_00009223	0	1	1	0
TCONS_00009227	0	1	0	1
TCONS_00009241	0	1	1	0
TCONS_00009253	0	1	0	1
TCONS_00009264	0	1	0	1
TCONS_00009265	0	1	0	1
TCONS_00009270	0	1	1	1
TCONS_00009279	0	1	1	1
TCONS_00009283	0	1	1	0
TCONS_00009310	0	1	1	0
TCONS_00009319	0	1	0	1
TCONS_00009321	0	1	1	0
TCONS_00009326	0	1	1	0
TCONS_00009327	0	1	1	1
TCONS_00009328	0	1	1	1
TCONS_00009338	0	1	1	1
TCONS_00009339	0	1	1	1
TCONS_00009340	0	1	0	1
TCONS_00009341	0	1	0	1
TCONS_00009343	0	1	1	0
TCONS_00009351	0	1	0	1
TCONS_00009368	0	1	0	1
TCONS_00009372	0	1	1	0
TCONS_00009374	0	1	1	0
TCONS_00009377	0	1	1	1
TCONS_00009379	0	1	0	1
TCONS_00009380	0	1	0	1
TCONS_00009381	0	1	1	1
TCONS_00009383	0	1	1	1
TCONS_00009393	0	1	1	1
TCONS_00009394	0	1	0	1
TCONS_00009395	0	1	1	1
TCONS_00009403	0	1	0	1
TCONS_00009406	0	1	1	1
TCONS_00009410	0	1	0	1
TCONS_00009411	0	1	1	1
TCONS_00009412	0	1	1	1
TCONS_00009419	0	1	0	1
TCONS_00009421	0	1	1	1
TCONS_00009439	0	1	1	0
TCONS_00009440	0	1	0	1
TCONS_00009445	0	1	1	0
TCONS_00009456	0	1	0	1
TCONS_00009459	0	1	0	1
TCONS_00009465	0	1	0	1
TCONS_00009490	0	1	1	0
TCONS_00009491	0	1	1	1
TCONS_00009492	0	1	0	1
TCONS_00009516	0	1	1	1
TCONS_00009517	0	1	0	1
TCONS_00009537	0	1	1	0
TCONS_00009560	0	1	0	1
TCONS_00009561	0	1	1	1
TCONS_00009563	0	1	1	0
TCONS_00009564	0	1	1	0
TCONS_00009567	0	1	0	1
TCONS_00009570	0	1	1	0
TCONS_00009571	0	1	1	1
TCONS_00009573	0	1	1	0
TCONS_00009583	0	1	0	1
TCONS_00009584	0	1	0	1
TCONS_00009595	0	1	0	1
TCONS_00009598	0	1	0	1
TCONS_00009615	0	1	0	1
TCONS_00009618	0	1	1	0
TCONS_00009620	0	1	1	1
TCONS_00009622	0	1	1	1
TCONS_00009629	0	1	0	1
TCONS_00009660	0	1	1	0
TCONS_00009665	0	1	1	0
TCONS_00009686	0	1	0	1
TCONS_00009703	0	1	0	1
TCONS_00009714	0	1	1	1
TCONS_00009717	0	1	0	1
TCONS_00009721	0	1	0	1
TCONS_00009727	0	1	1	1
TCONS_00009731	0	1	0	1
TCONS_00009737	0	1	0	1
TCONS_00009744	0	1	0	1
TCONS_00009747	0	1	1	0
TCONS_00009750	0	1	0	1
TCONS_00009753	0	1	1	0
TCONS_00009760	0	1	1	1
TCONS_00009818	0	1	0	1
TCONS_00009896	0	1	0	1
TCONS_00009904	0	1	1	0
TCONS_00009957	0	1	1	1
TCONS_00010036	0	1	0	1
TCONS_00010042	0	1	0	1
TCONS_00010062	0	0	1	1
TCONS_00010080	0	0	1	1
TCONS_00010177	0	0	1	1
TCONS_00010202	0	0	1	1
TCONS_00010219	0	0	1	1
TCONS_00010238	0	0	1	1
TCONS_00010239	0	0	1	1
TCONS_00010240	0	0	1	1
TCONS_00010243	0	0	1	1
TCONS_00010299	0	0	1	1
TCONS_00010300	0	0	1	1
TCONS_00010445	0	0	1	1
TCONS_00010448	0	0	1	1
TCONS_00010449	0	0	1	1
TCONS_00010450	0	0	1	1
TCONS_00010452	0	0	1	1
TCONS_00010453	0	0	1	1
TCONS_00010477	0	0	1	1
TCONS_00010483	0	0	1	1
TCONS_00010532	0	0	1	1
TCONS_00010552	0	0	1	1
TCONS_00010657	0	0	1	1
TCONS_00010728	0	0	1	1
TCONS_00010746	0	0	1	1
TCONS_00010982	0	0	1	1
TCONS_00010993	0	0	1	1
TCONS_00010994	0	0	1	1
TCONS_00010997	0	0	1	1
TCONS_00011058	0	0	1	1
TCONS_00011064	0	0	1	1
TCONS_00011111	0	0	1	1
TCONS_00011152	0	0	1	1
TCONS_00011162	0	0	1	1
TCONS_00011234	0	0	1	1
TCONS_00011241	0	0	1	1
TCONS_00011261	0	0	1	1
TCONS_00011349	0	0	1	1
TCONS_00011403	0	0	1	1
TCONS_00011420	0	0	1	1
TCONS_00011431	0	0	1	1
TCONS_00011466	0	0	1	1
TCONS_00011471	0	0	1	1
TCONS_00011487	0	0	1	1
TCONS_00011509	0	0	1	1
TCONS_00011510	0	0	1	1
TCONS_00011545	0	0	1	1
TCONS_00011573	0	0	1	1
TCONS_00011586	0	0	1	1
TCONS_00011622	0	0	1	1
TCONS_00011658	0	0	1	1
TCONS_00011686	0	0	1	1
TCONS_00011720	0	0	1	1
TCONS_00011816	0	0	1	1
TCONS_00011847	0	0	1	1
TCONS_00011926	0	0	1	1
TCONS_00011986	0	0	1	1
TCONS_00012036	0	0	1	1
TCONS_00012088	0	0	1	1
TCONS_00012253	0	0	1	1
TCONS_00012254	0	0	1	1
TCONS_00012305	0	0	1	1
TCONS_00012380	0	0	1	1
TCONS_00012383	0	0	1	1
TCONS_00012427	0	0	1	1
TCONS_00012431	0	0	1	1
TCONS_00012434	0	0	1	1
TCONS_00012436	0	0	1	1
TCONS_00012439	0	0	1	1
TCONS_00012453	0	0	1	1
TCONS_00012469	0	0	1	1
TCONS_00012472	0	0	1	1
TCONS_00012495	0	0	1	1
TCONS_00012498	0	0	1	1
TCONS_00012560	0	0	1	1
TCONS_00012568	0	0	1	1
TCONS_00012587	0	0	1	1
TCONS_00012624	0	0	1	1
TCONS_00012665	0	0	1	1
TCONS_00012743	0	0	1	1
TCONS_00012751	0	0	1	1
TCONS_00012777	0	0	1	1
TCONS_00012798	0	0	1	1
TCONS_00012858	0	0	1	1
TCONS_00012989	0	0	1	1
TCONS_00012995	0	0	1	1
TCONS_00013007	0	0	1	1
TCONS_00013026	0	0	1	1
TCONS_00013050	0	0	1	1
TCONS_00013079	0	0	1	1
TCONS_00013091	0	0	1	1
TCONS_00013097	0	0	1	1
TCONS_00013124	0	0	1	1
TCONS_00013131	0	0	1	1
TCONS_00013146	0	0	1	1
TCONS_00013171	0	0	1	1
TCONS_00013172	0	0	1	1
TCONS_00013173	0	0	1	1
TCONS_00013191	0	0	1	1
TCONS_00013221	0	0	1	1
TCONS_00013258	0	0	1	1
TCONS_00013259	0	0	1	1
TCONS_00013293	0	0	1	1
TCONS_00013351	0	0	1	1
TCONS_00013393	0	0	1	1
TCONS_00013396	0	0	1	1
TCONS_00013410	0	0	1	1
TCONS_00013491	0	0	1	1
TCONS_00013689	0	0	1	1
TCONS_00013690	0	0	1	1
TCONS_00013736	0	0	1	1
TCONS_00013866	0	0	1	1
TCONS_00013886	0	0	1	1
TCONS_00013963	0	0	1	1
TCONS_00013979	0	0	1	1
TCONS_00016460	1	1	0	0
TCONS_00016461	1	1	1	1
TCONS_00016465	1	1	1	1
TCONS_00016468	1	0	1	0
TCONS_00016479	1	1	1	1
TCONS_00016481	1	1	1	0
TCONS_00016482	1	1	1	1
TCONS_00016483	1	0	0	1
TCONS_00016499	1	1	1	1
TCONS_00016501	1	1	0	0
TCONS_00016505	1	1	1	0
TCONS_00016506	1	1	1	1
TCONS_00016522	1	0	1	0
TCONS_00016527	1	0	1	0
TCONS_00016537	1	0	0	1
TCONS_00016539	1	1	0	0
TCONS_00016545	1	1	0	1
TCONS_00016549	1	0	1	0
TCONS_00016550	1	0	1	0
TCONS_00016554	1	1	0	0
TCONS_00016555	1	0	0	1
TCONS_00016559	1	0	1	0
TCONS_00016560	1	0	1	0
TCONS_00016567	1	1	0	1
TCONS_00016568	1	1	1	1
TCONS_00016570	1	1	1	0
TCONS_00016573	1	0	1	1
TCONS_00016576	1	0	0	1
TCONS_00016583	1	0	1	0
TCONS_00016584	1	0	1	1
TCONS_00016585	1	1	1	0
TCONS_00016586	1	1	1	0
TCONS_00016589	1	0	1	0
TCONS_00016591	1	1	1	0
TCONS_00016592	1	0	1	0
TCONS_00016594	1	1	1	0
TCONS_00016600	1	1	1	1
TCONS_00016601	1	1	0	1
TCONS_00016603	1	1	0	1
TCONS_00016613	1	0	1	0
TCONS_00016615	1	1	1	1
TCONS_00016620	1	1	1	1
TCONS_00016621	1	0	1	1
TCONS_00016625	1	0	1	0
TCONS_00016632	1	0	1	0
TCONS_00016633	1	0	1	0
TCONS_00016634	1	0	1	0
TCONS_00016638	1	0	1	0
TCONS_00016639	1	0	1	0
TCONS_00016645	1	0	1	0
TCONS_00016658	1	0	0	1
TCONS_00016662	1	0	1	0
TCONS_00016677	1	0	1	0
TCONS_00016680	1	0	1	1
TCONS_00016682	1	1	1	1
TCONS_00016685	1	0	0	1
TCONS_00016687	1	0	0	1
TCONS_00016688	1	0	1	0
TCONS_00016713	1	1	0	0
TCONS_00016716	1	1	1	0
TCONS_00016719	1	0	1	0
TCONS_00016724	1	1	1	1
TCONS_00016726	1	1	0	1
TCONS_00016729	1	0	0	1
TCONS_00016746	1	1	1	1
TCONS_00016747	1	1	0	1
TCONS_00016754	1	0	0	1
TCONS_00016772	1	0	1	0
TCONS_00016778	1	1	1	0
TCONS_00016779	1	1	1	0
TCONS_00016784	1	1	0	0
TCONS_00016796	1	0	1	0
TCONS_00016800	1	0	1	0
TCONS_00016808	1	1	1	0
TCONS_00016809	1	1	0	0
TCONS_00016811	1	1	0	0
TCONS_00016812	1	1	1	0
TCONS_00016814	1	1	0	0
TCONS_00016823	1	0	1	1
TCONS_00016827	1	0	0	1
TCONS_00016829	1	0	0	1
TCONS_00016842	1	1	0	0
TCONS_00016847	1	0	1	0
TCONS_00016868	1	1	1	1
TCONS_00016886	1	1	0	0
TCONS_00016891	1	0	1	0
TCONS_00016892	1	0	1	0
TCONS_00016899	1	1	0	1
TCONS_00016901	1	0	1	0
TCONS_00016902	1	0	1	0
TCONS_00016921	1	0	1	0
TCONS_00016922	1	0	1	0
TCONS_00016923	1	0	1	0
TCONS_00016924	1	0	1	0
TCONS_00016927	1	0	1	0
TCONS_00016933	1	0	1	0
TCONS_00016934	1	0	1	0
TCONS_00016935	1	0	1	0
TCONS_00016936	1	0	1	0
TCONS_00016937	1	1	1	1
TCONS_00016938	1	1	1	0
TCONS_00016957	1	1	1	1
TCONS_00016964	1	1	1	1
TCONS_00016965	1	0	0	1
TCONS_00016979	1	1	0	0
TCONS_00017003	1	1	0	1
TCONS_00017004	1	0	1	0
TCONS_00017005	1	1	0	1
TCONS_00017022	1	0	1	0
TCONS_00017023	1	0	1	0
TCONS_00017039	1	1	1	0
TCONS_00017040	1	1	0	0
TCONS_00017060	1	0	1	0
TCONS_00017067	1	1	1	1
TCONS_00017074	1	1	1	1
TCONS_00017076	1	1	1	0
TCONS_00017095	1	1	1	1
TCONS_00017097	1	0	1	1
TCONS_00017099	1	1	1	1
TCONS_00017107	1	1	0	1
TCONS_00017108	1	1	1	0
TCONS_00017109	1	1	1	1
TCONS_00017111	1	1	1	1
TCONS_00017112	1	1	1	1
TCONS_00017113	1	1	1	1
TCONS_00017119	1	1	1	1
TCONS_00017120	1	1	1	1
TCONS_00017122	1	1	0	0
TCONS_00017128	1	0	1	0
TCONS_00017142	1	0	0	1
TCONS_00017144	1	1	1	0
TCONS_00017147	1	0	1	0
TCONS_00017156	1	1	0	0
TCONS_00017157	1	1	0	1
TCONS_00017164	1	0	0	1
TCONS_00017166	1	0	1	1
TCONS_00017180	1	0	1	0
TCONS_00017196	1	1	1	1
TCONS_00017230	1	0	1	0
TCONS_00017242	1	0	1	0
TCONS_00017256	1	1	1	1
TCONS_00017260	1	0	1	0
TCONS_00017266	1	1	0	0
TCONS_00017279	1	1	0	1
TCONS_00017281	1	0	0	1
TCONS_00017284	1	1	0	0
TCONS_00017286	1	0	0	1
TCONS_00017296	1	1	1	0
TCONS_00017309	1	1	1	1
TCONS_00017310	1	1	0	1
TCONS_00017323	1	1	1	0
TCONS_00017357	1	1	1	1
TCONS_00017358	1	1	1	1
TCONS_00017364	1	0	0	1
TCONS_00017382	1	1	0	0
TCONS_00017384	1	0	1	0
TCONS_00017404	1	1	0	0
TCONS_00017406	1	0	0	1
TCONS_00017410	1	0	1	1
TCONS_00017411	1	0	0	1
TCONS_00017412	1	0	0	1
TCONS_00017431	1	0	0	1
TCONS_00017434	1	0	0	1
TCONS_00017453	1	1	0	0
TCONS_00017455	1	1	1	1
TCONS_00017456	1	1	1	0
TCONS_00017458	1	0	1	0
TCONS_00017459	1	0	1	0
TCONS_00017475	1	1	1	1
TCONS_00017479	1	0	1	0
TCONS_00017481	1	0	1	0
TCONS_00017486	1	0	1	0
TCONS_00017487	1	0	1	0
TCONS_00017501	1	1	1	1
TCONS_00017507	1	1	1	0
TCONS_00017528	1	1	1	1
TCONS_00017530	1	0	1	0
TCONS_00017535	1	1	1	1
TCONS_00017536	1	1	1	1
TCONS_00017555	1	0	1	0
TCONS_00017557	1	1	1	1
TCONS_00017561	1	1	0	0
TCONS_00017563	1	1	1	0
TCONS_00017566	1	0	1	0
TCONS_00017567	1	1	0	1
TCONS_00017596	1	1	0	0
TCONS_00017641	1	1	1	1
TCONS_00017646	1	0	1	0
TCONS_00017655	1	0	1	0
TCONS_00017662	1	1	1	1
TCONS_00017675	1	1	0	1
TCONS_00017678	1	1	1	1
TCONS_00017680	1	0	0	1
TCONS_00017683	1	0	1	1
TCONS_00017684	1	0	1	1
TCONS_00017685	1	1	0	1
TCONS_00017686	1	1	0	1
TCONS_00017688	1	1	1	0
TCONS_00017689	1	1	1	1
TCONS_00017690	1	1	1	1
TCONS_00017693	1	0	1	0
TCONS_00017694	1	0	1	1
TCONS_00017701	1	0	1	0
TCONS_00017702	1	0	1	0
TCONS_00017712	1	1	0	1
TCONS_00017724	1	0	1	0
TCONS_00017725	1	1	1	0
TCONS_00017729	1	1	1	1
TCONS_00017730	1	1	1	1
TCONS_00017743	1	0	1	0
TCONS_00017749	1	1	1	1
TCONS_00017751	1	1	1	0
TCONS_00017764	1	1	1	0
TCONS_00017766	1	1	1	0
TCONS_00017775	1	1	1	1
TCONS_00017776	1	0	1	0
TCONS_00017777	1	0	0	1
TCONS_00017778	1	1	1	1
TCONS_00017779	1	0	0	1
TCONS_00017782	1	1	0	1
TCONS_00017786	1	0	1	0
TCONS_00017800	1	1	0	1
TCONS_00017801	1	1	0	1
TCONS_00017804	1	0	0	1
TCONS_00017805	1	1	0	1
TCONS_00017830	1	0	1	0
TCONS_00017844	1	1	0	1
TCONS_00017850	1	0	1	0
TCONS_00017854	1	1	0	1
TCONS_00017855	1	0	1	1
TCONS_00017857	1	1	1	1
TCONS_00017871	1	1	1	1
TCONS_00017876	1	0	0	1
TCONS_00017891	1	0	1	0
TCONS_00017892	1	1	1	0
TCONS_00017893	1	1	1	0
TCONS_00017897	1	1	1	1
TCONS_00017902	1	0	1	1
TCONS_00017905	1	1	1	1
TCONS_00017908	1	1	1	1
TCONS_00017911	1	1	1	1
TCONS_00017921	1	0	0	1
TCONS_00017922	1	0	0	1
TCONS_00017958	1	1	1	1
TCONS_00017959	1	1	0	1
TCONS_00017961	1	1	1	1
TCONS_00017962	1	0	1	0
TCONS_00017965	1	0	0	1
TCONS_00017966	1	0	0	1
TCONS_00017967	1	0	0	1
TCONS_00017970	1	0	0	1
TCONS_00017991	1	0	1	0
TCONS_00018000	1	1	1	1
TCONS_00018001	1	0	1	0
TCONS_00018016	1	1	0	0
TCONS_00018019	1	0	1	0
TCONS_00018022	1	0	1	0
TCONS_00018023	1	1	1	1
TCONS_00018036	1	0	1	0
TCONS_00018052	1	1	1	0
TCONS_00018060	1	1	1	1
TCONS_00018063	1	0	0	1
TCONS_00018064	1	1	1	1
TCONS_00018067	1	1	1	1
TCONS_00018077	1	1	1	0
TCONS_00018078	1	1	1	1
TCONS_00018079	1	0	1	1
TCONS_00018093	1	1	1	1
TCONS_00018094	1	1	1	1
TCONS_00018095	1	1	1	1
TCONS_00018098	1	0	1	0
TCONS_00018111	1	1	0	1
TCONS_00018138	1	0	0	1
TCONS_00018139	1	1	0	1
TCONS_00018153	1	0	1	0
TCONS_00018156	1	1	0	0
TCONS_00018157	1	0	1	1
TCONS_00018158	1	1	1	1
TCONS_00018159	1	1	0	1
TCONS_00018160	1	0	1	1
TCONS_00018177	1	0	1	0
TCONS_00018178	1	1	1	0
TCONS_00018181	1	0	1	0
TCONS_00018190	1	1	0	1
TCONS_00018192	1	0	1	0
TCONS_00018195	1	1	1	0
TCONS_00018196	1	1	1	1
TCONS_00018198	1	0	1	0
TCONS_00018205	1	1	0	1
TCONS_00018214	1	1	0	1
TCONS_00018215	1	1	0	1
TCONS_00018239	1	1	0	0
TCONS_00018240	1	0	0	1
TCONS_00018242	1	1	0	0
TCONS_00018247	1	1	1	0
TCONS_00018249	1	0	1	0
TCONS_00018250	1	0	1	0
TCONS_00018262	1	1	1	0
TCONS_00018271	1	0	1	0
TCONS_00018273	1	0	1	0
TCONS_00018280	1	0	1	0
TCONS_00018290	1	1	1	1
TCONS_00018294	1	1	1	1
TCONS_00018295	1	1	0	0
TCONS_00018296	1	1	1	0
TCONS_00018306	1	0	0	1
TCONS_00018307	1	0	1	0
TCONS_00018319	1	1	1	0
TCONS_00018325	1	1	0	1
TCONS_00018326	1	1	1	1
TCONS_00018338	1	0	1	0
TCONS_00018350	1	1	0	1
TCONS_00018364	1	0	1	0
TCONS_00018379	1	0	1	0
TCONS_00018386	1	0	1	0
TCONS_00018388	1	1	1	0
TCONS_00018396	1	1	1	1
TCONS_00018397	1	1	0	0
TCONS_00018398	1	1	1	0
TCONS_00018405	1	0	1	0
TCONS_00018406	1	0	1	0
TCONS_00018410	1	0	1	0
TCONS_00018416	1	0	0	1
TCONS_00018430	1	1	0	0
TCONS_00018473	1	0	1	0
TCONS_00018481	1	1	1	1
TCONS_00018483	1	1	1	1
TCONS_00018485	1	0	1	0
TCONS_00018503	1	0	1	1
TCONS_00018504	1	1	0	0
TCONS_00018506	1	1	0	0
TCONS_00018507	1	0	1	1
TCONS_00018509	1	0	1	0
TCONS_00018510	1	1	1	0
TCONS_00018524	1	1	0	1
TCONS_00018532	1	1	1	0
TCONS_00018533	1	1	1	0
TCONS_00018535	1	1	1	0
TCONS_00018538	1	0	1	0
TCONS_00018542	1	1	0	0
TCONS_00018565	1	1	0	1
TCONS_00018566	1	1	1	1
TCONS_00018577	1	1	0	0
TCONS_00018579	1	0	1	0
TCONS_00018581	1	1	0	1
TCONS_00018582	1	1	0	1
TCONS_00018583	1	1	1	1
TCONS_00018591	1	0	0	1
TCONS_00018595	1	1	1	1
TCONS_00018596	1	0	1	0
TCONS_00018604	1	1	0	0
TCONS_00018628	1	0	0	1
TCONS_00018629	1	0	0	1
TCONS_00018632	1	1	1	1
TCONS_00018634	1	0	1	0
TCONS_00018636	1	1	1	1
TCONS_00018637	1	1	0	1
TCONS_00018638	1	1	0	0
TCONS_00018641	1	0	1	0
TCONS_00018650	1	0	1	0
TCONS_00018651	1	0	1	1
TCONS_00018697	1	1	1	1
TCONS_00018709	1	0	1	1
TCONS_00018713	1	1	1	0
TCONS_00018715	1	1	0	0
TCONS_00018717	1	1	1	1
TCONS_00018734	1	0	1	0
TCONS_00018741	1	0	1	0
TCONS_00018757	1	1	0	0
TCONS_00018763	1	1	1	1
TCONS_00018764	1	1	1	1
TCONS_00018773	1	0	1	1
TCONS_00018778	1	1	0	1
TCONS_00018779	1	1	0	0
TCONS_00018781	1	1	0	0
TCONS_00018782	1	0	1	0
TCONS_00018827	1	1	0	0
TCONS_00018831	1	1	1	1
TCONS_00018834	1	1	0	0
TCONS_00018841	1	0	0	1
TCONS_00018861	1	0	0	1
TCONS_00018865	1	0	0	1
TCONS_00018867	1	1	0	0
TCONS_00018872	1	1	1	1
TCONS_00018874	1	0	1	0
TCONS_00018883	1	0	0	1
TCONS_00018886	1	1	0	1
TCONS_00018888	1	0	1	1
TCONS_00018889	1	0	1	1
TCONS_00018890	1	1	0	1
TCONS_00018891	1	1	1	0
TCONS_00018892	1	0	1	1
TCONS_00018893	1	1	0	0
TCONS_00018897	1	0	1	0
TCONS_00018898	1	1	1	1
TCONS_00018899	1	1	1	1
TCONS_00018902	1	0	1	0
TCONS_00018903	1	0	1	0
TCONS_00018912	1	0	1	0
TCONS_00018920	1	0	1	0
TCONS_00018924	1	0	1	0
TCONS_00018933	1	1	1	1
TCONS_00018937	1	0	1	0
TCONS_00018942	1	1	1	1
TCONS_00018949	1	1	1	0
TCONS_00018950	1	0	0	1
TCONS_00018951	1	0	1	0
TCONS_00018961	1	1	0	0
TCONS_00018963	1	1	0	0
TCONS_00018964	1	1	0	0
TCONS_00018971	1	1	1	0
TCONS_00018972	1	1	1	0
TCONS_00018973	1	1	0	0
TCONS_00018975	1	1	1	0
TCONS_00018976	1	1	1	0
TCONS_00018980	1	0	1	0
TCONS_00018991	1	0	0	1
TCONS_00018998	1	0	0	1
TCONS_00019006	1	1	1	1
TCONS_00019007	1	1	1	0
TCONS_00019019	1	1	1	1
TCONS_00019020	1	1	1	1
TCONS_00019021	1	0	1	0
TCONS_00019024	1	1	0	1
TCONS_00019030	1	0	1	0
TCONS_00019032	1	1	1	0
TCONS_00019033	1	0	1	0
TCONS_00019034	1	0	1	0
TCONS_00019051	1	0	1	0
TCONS_00019060	1	1	0	0
TCONS_00019073	1	1	1	1
TCONS_00019080	1	0	1	0
TCONS_00019087	1	1	0	0
TCONS_00019088	1	0	0	1
TCONS_00019095	1	1	1	1
TCONS_00019096	1	1	1	1
TCONS_00019100	1	1	1	1
TCONS_00019103	1	0	1	1
TCONS_00019105	1	0	1	1
TCONS_00019115	1	0	1	0
TCONS_00019116	1	0	1	0
TCONS_00019118	1	1	1	1
TCONS_00019121	1	0	0	1
TCONS_00019131	1	0	0	1
TCONS_00019132	1	0	1	0
TCONS_00019133	1	0	0	1
TCONS_00019143	1	0	1	1
TCONS_00019144	1	0	1	0
TCONS_00019146	1	0	1	1
TCONS_00019149	1	0	1	1
TCONS_00019150	1	0	1	0
TCONS_00019152	1	0	1	0
TCONS_00019154	1	1	1	1
TCONS_00019165	1	1	0	0
TCONS_00019175	1	1	1	0
TCONS_00019184	1	1	0	0
TCONS_00019186	1	0	1	0
TCONS_00019193	1	1	0	0
TCONS_00019195	1	0	0	1
TCONS_00019205	1	1	1	1
TCONS_00019206	1	0	0	1
TCONS_00019208	1	1	1	1
TCONS_00019209	1	1	1	1
TCONS_00019216	1	0	1	1
TCONS_00019217	1	1	0	0
TCONS_00019220	1	1	0	1
TCONS_00019236	1	0	1	1
TCONS_00019248	1	1	1	1
TCONS_00019249	1	1	1	0
TCONS_00019278	1	1	0	1
TCONS_00019289	1	0	1	0
TCONS_00019292	1	0	1	0
TCONS_00019295	1	1	1	0
TCONS_00019316	1	1	0	0
TCONS_00019317	1	1	1	1
TCONS_00019318	1	1	1	1
TCONS_00019322	1	1	1	1
TCONS_00019324	1	0	0	1
TCONS_00019331	1	0	1	0
TCONS_00019335	1	0	0	1
TCONS_00019336	1	1	0	0
TCONS_00019337	1	1	0	0
TCONS_00019338	1	1	1	0
TCONS_00019340	1	1	0	0
TCONS_00019342	1	1	0	0
TCONS_00019343	1	0	1	0
TCONS_00019346	1	0	1	0
TCONS_00019352	1	1	0	1
TCONS_00019369	1	1	1	1
TCONS_00019371	1	0	0	1
TCONS_00019379	1	1	0	0
TCONS_00019380	1	1	0	0
TCONS_00019381	1	0	1	0
TCONS_00019386	1	0	0	1
TCONS_00019389	1	0	0	1
TCONS_00019402	1	1	0	0
TCONS_00019408	1	1	1	0
TCONS_00019418	1	0	1	0
TCONS_00019422	1	1	1	1
TCONS_00019423	1	0	1	1
TCONS_00019440	1	0	1	0
TCONS_00019453	1	0	1	1
TCONS_00019454	1	0	1	0
TCONS_00019471	1	1	0	0
TCONS_00019476	1	1	0	1
TCONS_00019487	1	1	1	1
TCONS_00019488	1	0	1	1
TCONS_00019489	1	1	1	1
TCONS_00019491	1	1	1	1
TCONS_00019496	1	1	1	1
TCONS_00019501	1	0	1	0
TCONS_00019523	1	1	1	0
TCONS_00019531	1	1	1	1
TCONS_00019534	1	0	1	0
TCONS_00019539	1	1	0	0
TCONS_00019540	1	0	0	1
TCONS_00019551	1	1	1	1
TCONS_00019561	1	0	1	0
TCONS_00019565	1	0	1	0
TCONS_00019584	1	1	1	1
TCONS_00019586	1	1	1	1
TCONS_00019602	1	0	1	1
TCONS_00019603	1	0	1	0
TCONS_00019605	1	0	1	1
TCONS_00019641	1	0	1	0
TCONS_00019646	1	1	0	0
TCONS_00019651	1	1	1	0
TCONS_00019670	1	0	1	0
TCONS_00019672	1	1	1	0
TCONS_00019675	1	0	1	0
TCONS_00019677	1	0	1	0
TCONS_00019680	1	0	1	0
TCONS_00019685	1	1	1	1
TCONS_00019686	1	1	0	0
TCONS_00019688	1	1	0	0
TCONS_00019692	1	1	0	0
TCONS_00019693	1	1	1	0
TCONS_00019697	1	0	1	0
TCONS_00019698	1	0	1	0
TCONS_00019702	1	0	0	1
TCONS_00019703	1	1	1	1
TCONS_00019704	1	1	1	1
TCONS_00019705	1	0	0	1
TCONS_00019707	1	0	0	1
TCONS_00019712	1	1	1	0
TCONS_00019734	1	1	1	1
TCONS_00019737	1	1	1	0
TCONS_00019738	1	0	1	0
TCONS_00019739	1	1	1	1
TCONS_00019750	1	0	1	0
TCONS_00019753	1	1	1	1
TCONS_00019761	1	0	1	0
TCONS_00019771	1	0	0	1
TCONS_00019773	1	0	1	0
TCONS_00019774	1	0	1	0
TCONS_00019776	1	0	1	0
TCONS_00019777	1	0	1	0
TCONS_00019778	1	1	1	1
TCONS_00019779	1	1	0	0
TCONS_00019781	1	1	0	0
TCONS_00019782	1	1	1	1
TCONS_00019785	1	0	1	0
TCONS_00019800	1	0	1	0
TCONS_00019805	1	1	0	0
TCONS_00019807	1	1	0	0
TCONS_00019809	1	1	0	1
TCONS_00019812	1	1	0	0
TCONS_00019813	1	1	0	0
TCONS_00019817	1	0	1	1
TCONS_00019838	1	1	1	1
TCONS_00019845	1	0	1	0
TCONS_00019852	1	1	1	1
TCONS_00019859	1	0	0	1
TCONS_00019860	1	1	1	1
TCONS_00019861	1	1	1	1
TCONS_00019877	1	1	0	0
TCONS_00019880	1	1	1	0
TCONS_00019882	1	1	1	1
TCONS_00019887	1	0	1	0
TCONS_00019891	1	0	0	1
TCONS_00019897	1	0	1	0
TCONS_00019899	1	1	0	1
TCONS_00019902	1	1	0	0
TCONS_00019903	1	0	0	1
TCONS_00019904	1	0	1	1
TCONS_00019905	1	1	1	1
TCONS_00019910	1	1	0	0
TCONS_00019930	1	0	0	1
TCONS_00019936	1	1	0	0
TCONS_00019943	1	0	1	1
TCONS_00019944	1	0	0	1
TCONS_00019945	1	0	1	0
TCONS_00019951	1	1	1	1
TCONS_00019959	1	1	0	0
TCONS_00019960	1	1	0	1
TCONS_00019961	1	0	1	0
TCONS_00019963	1	1	0	1
TCONS_00019984	1	1	0	0
TCONS_00019990	1	1	0	0
TCONS_00019991	1	1	1	0
TCONS_00019992	1	1	1	0
TCONS_00019999	1	0	1	0
TCONS_00020000	1	1	0	0
TCONS_00020001	1	1	1	1
TCONS_00020002	1	1	1	1
TCONS_00020017	1	1	0	1
TCONS_00020019	1	1	1	0
TCONS_00020028	1	1	1	1
TCONS_00020032	1	1	0	0
TCONS_00020035	1	0	0	1
TCONS_00020049	1	1	0	1
TCONS_00020054	1	0	0	1
TCONS_00020058	1	1	0	0
TCONS_00020068	1	0	1	0
TCONS_00020070	1	1	0	1
TCONS_00020075	1	1	0	0
TCONS_00020077	1	1	0	1
TCONS_00020090	1	1	1	0
TCONS_00020091	1	0	0	1
TCONS_00020092	1	1	0	0
TCONS_00020093	1	0	1	0
TCONS_00020094	1	0	1	0
TCONS_00020095	1	1	0	0
TCONS_00020096	1	1	1	1
TCONS_00020097	1	0	0	1
TCONS_00020102	1	0	0	1
TCONS_00020103	1	1	0	1
TCONS_00020104	1	1	0	1
TCONS_00020105	1	1	0	1
TCONS_00020108	1	0	0	1
TCONS_00020109	1	1	0	1
TCONS_00020111	1	1	0	1
TCONS_00020112	1	0	1	1
TCONS_00020113	1	1	1	1
TCONS_00020115	1	1	1	1
TCONS_00020118	1	1	1	1
TCONS_00020119	1	1	1	1
TCONS_00020125	1	0	1	1
TCONS_00020154	1	0	1	0
TCONS_00020172	1	1	1	0
TCONS_00020176	1	0	1	0
TCONS_00020177	1	0	0	1
TCONS_00020182	1	1	1	1
TCONS_00020197	1	0	1	0
TCONS_00020206	1	0	1	1
TCONS_00020207	1	1	1	1
TCONS_00020227	1	0	1	0
TCONS_00020232	1	0	0	1
TCONS_00020233	1	0	0	1
TCONS_00020253	1	0	1	0
TCONS_00020254	1	1	0	1
TCONS_00020268	1	1	0	1
TCONS_00020271	1	1	1	1
TCONS_00020274	1	1	1	0
TCONS_00020276	1	0	1	0
TCONS_00020280	1	0	1	0
TCONS_00020281	1	0	1	0
TCONS_00020282	1	0	1	0
TCONS_00020285	1	1	1	0
TCONS_00020287	1	0	1	1
TCONS_00020289	1	0	1	1
TCONS_00020291	1	0	1	0
TCONS_00020295	1	0	1	0
TCONS_00020299	1	0	1	0
TCONS_00020304	1	1	1	1
TCONS_00020305	1	0	1	1
TCONS_00020308	1	1	1	1
TCONS_00020318	1	1	0	0
TCONS_00020329	1	1	1	1
TCONS_00020334	1	1	0	0
TCONS_00020335	1	1	1	1
TCONS_00020336	1	1	0	1
TCONS_00020337	1	0	1	0
TCONS_00020338	1	0	1	1
TCONS_00020342	1	1	1	1
TCONS_00020344	1	0	1	0
TCONS_00020346	1	1	0	0
TCONS_00020354	1	1	1	1
TCONS_00020359	1	1	0	0
TCONS_00020360	1	1	1	0
TCONS_00020361	1	1	1	1
TCONS_00020362	1	1	1	1
TCONS_00020363	1	0	0	1
TCONS_00020365	1	1	0	0
TCONS_00020366	1	1	1	1
TCONS_00020369	1	1	1	1
TCONS_00020386	1	0	1	0
TCONS_00020388	1	0	1	0
TCONS_00020390	1	1	0	1
TCONS_00020391	1	0	0	1
TCONS_00020393	1	1	1	1
TCONS_00020394	1	1	1	1
TCONS_00020395	1	0	1	1
TCONS_00020402	1	1	0	1
TCONS_00020403	1	1	0	0
TCONS_00020405	1	1	1	1
TCONS_00020411	1	0	1	0
TCONS_00020426	1	0	0	1
TCONS_00020430	1	1	1	1
TCONS_00020437	1	0	1	0
TCONS_00020448	1	1	0	1
TCONS_00020450	1	1	0	1
TCONS_00020451	1	1	1	1
TCONS_00020452	1	1	0	1
TCONS_00020453	1	0	0	1
TCONS_00020460	1	1	0	1
TCONS_00020463	1	1	1	1
TCONS_00020464	1	1	1	1
TCONS_00020465	1	1	1	1
TCONS_00020467	1	0	1	1
TCONS_00020480	1	0	0	1
TCONS_00020483	1	0	1	0
TCONS_00020494	1	0	0	1
TCONS_00020500	1	1	0	0
TCONS_00020524	1	1	0	0
TCONS_00020525	1	1	0	1
TCONS_00020532	1	0	1	0
TCONS_00020533	1	1	1	0
TCONS_00020534	1	0	1	0
TCONS_00020549	1	0	1	1
TCONS_00020556	1	0	1	0
TCONS_00020557	1	0	1	0
TCONS_00020565	1	0	0	1
TCONS_00020570	1	1	0	1
TCONS_00020574	1	1	0	0
TCONS_00020579	1	1	0	1
TCONS_00020583	1	0	0	1
TCONS_00020584	1	1	0	0
TCONS_00020585	1	0	0	1
TCONS_00020586	1	1	0	1
TCONS_00020588	1	1	1	0
TCONS_00020621	1	1	1	1
TCONS_00020627	1	0	1	1
TCONS_00020628	1	1	1	0
TCONS_00020638	1	1	0	1
TCONS_00020647	1	0	1	0
TCONS_00020653	1	1	1	1
TCONS_00020657	1	1	0	0
TCONS_00020661	1	0	1	0
TCONS_00020662	1	1	1	0
TCONS_00020663	1	1	1	1
TCONS_00020671	1	1	0	0
TCONS_00020675	1	1	1	1
TCONS_00020691	1	0	1	0
TCONS_00020695	1	0	1	1
TCONS_00020696	1	0	1	0
TCONS_00020697	1	0	1	0
TCONS_00020705	1	1	1	0
TCONS_00020706	1	1	1	1
TCONS_00020707	1	0	0	1
TCONS_00020708	1	1	1	1
TCONS_00020710	1	1	0	0
TCONS_00020711	1	1	1	1
TCONS_00020718	1	0	1	1
TCONS_00020719	1	1	1	1
TCONS_00020721	1	1	1	1
TCONS_00020722	1	0	1	0
TCONS_00020724	1	0	1	1
TCONS_00020725	1	0	1	0
TCONS_00020736	1	1	1	0
TCONS_00020738	1	1	0	1
TCONS_00020739	1	1	1	0
TCONS_00020743	1	0	1	1
TCONS_00020744	1	0	0	1
TCONS_00020745	1	0	1	1
TCONS_00020747	1	1	0	1
TCONS_00020753	1	1	0	0
TCONS_00020757	1	0	1	0
TCONS_00020759	1	1	1	1
TCONS_00020763	1	1	0	1
TCONS_00020764	1	1	1	1
TCONS_00020766	1	1	0	1
TCONS_00020770	1	1	0	1
TCONS_00020774	1	1	1	1
TCONS_00020775	1	1	1	1
TCONS_00020777	1	0	1	0
TCONS_00020779	1	0	1	1
TCONS_00020780	1	1	1	1
TCONS_00020781	1	0	1	0
TCONS_00020786	1	1	0	1
TCONS_00020790	1	0	1	1
TCONS_00020797	1	1	1	0
TCONS_00020800	1	0	1	0
TCONS_00020816	1	0	1	0
TCONS_00020819	1	1	1	1
TCONS_00020822	1	1	1	1
TCONS_00020823	1	1	0	1
TCONS_00020828	1	1	1	1
TCONS_00020830	1	0	0	1
TCONS_00020831	1	1	1	1
TCONS_00020833	1	0	1	0
TCONS_00020835	1	0	1	1
TCONS_00020848	1	1	0	0
TCONS_00020854	1	0	1	0
TCONS_00020855	1	0	1	0
TCONS_00020861	1	0	1	0
TCONS_00020864	1	0	1	0
TCONS_00020866	1	0	1	0
TCONS_00020867	1	0	1	0
TCONS_00020875	1	0	1	0
TCONS_00020894	1	0	1	0
TCONS_00020896	1	1	0	0
TCONS_00020906	1	1	1	1
TCONS_00020924	1	1	0	0
TCONS_00020927	1	0	1	0
TCONS_00020928	1	0	1	0
TCONS_00020937	1	1	1	1
TCONS_00020939	1	1	1	1
TCONS_00020943	1	0	1	0
TCONS_00020946	1	1	1	1
TCONS_00020957	1	0	1	1
TCONS_00020958	1	0	1	1
TCONS_00020959	1	0	1	1
TCONS_00020960	1	0	1	1
TCONS_00020972	1	0	1	1
TCONS_00020973	1	0	1	1
TCONS_00020982	1	1	1	1
TCONS_00020990	1	1	0	0
TCONS_00020991	1	0	1	0
TCONS_00020992	1	1	1	1
TCONS_00020993	1	0	1	0
TCONS_00020994	1	0	1	0
TCONS_00020995	1	0	1	1
TCONS_00020999	1	0	1	0
TCONS_00021000	1	1	0	1
TCONS_00021001	1	0	0	1
TCONS_00021002	1	0	1	0
TCONS_00021008	1	1	0	0
TCONS_00021011	1	0	1	0
TCONS_00021012	1	0	1	0
TCONS_00021014	1	1	1	0
TCONS_00021017	1	1	1	1
TCONS_00021024	1	0	0	1
TCONS_00021050	1	0	1	1
TCONS_00021051	1	1	1	1
TCONS_00021052	1	1	1	1
TCONS_00021058	1	1	0	1
TCONS_00021061	1	1	1	1
TCONS_00021077	1	1	0	1
TCONS_00021080	1	1	1	0
TCONS_00021086	1	1	0	0
TCONS_00021087	1	0	0	1
TCONS_00021088	1	1	0	1
TCONS_00021098	1	1	0	0
TCONS_00021099	1	1	1	0
TCONS_00021100	1	0	0	1
TCONS_00021101	1	1	1	0
TCONS_00021103	1	0	1	0
TCONS_00021108	1	0	0	1
TCONS_00021109	1	1	1	1
TCONS_00021110	1	1	1	1
TCONS_00021111	1	1	1	1
TCONS_00021128	1	1	0	0
TCONS_00021129	1	1	0	1
TCONS_00021130	1	0	1	0
TCONS_00021134	1	1	0	0
TCONS_00021141	1	1	1	1
TCONS_00021148	1	1	1	1
TCONS_00021150	1	1	1	0
TCONS_00021156	1	0	1	0
TCONS_00021171	1	1	0	0
TCONS_00021174	1	0	1	0
TCONS_00021176	1	0	1	1
TCONS_00021177	1	1	1	1
TCONS_00021178	1	1	1	1
TCONS_00021179	1	0	1	0
TCONS_00021180	1	0	1	0
TCONS_00021182	1	1	1	1
TCONS_00021186	1	1	1	1
TCONS_00021191	1	1	1	1
TCONS_00021193	1	1	1	1
TCONS_00021194	1	1	1	1
TCONS_00021197	1	1	0	0
TCONS_00021213	1	1	1	1
TCONS_00021217	1	0	0	1
TCONS_00021229	1	0	0	1
TCONS_00021238	1	0	1	0
TCONS_00021241	1	0	1	0
TCONS_00021242	1	0	1	0
TCONS_00021270	1	0	1	0
TCONS_00021272	1	0	1	0
TCONS_00021273	1	0	1	0
TCONS_00021280	1	0	0	1
TCONS_00021300	1	1	0	0
TCONS_00021306	1	0	1	0
TCONS_00021315	1	0	1	0
TCONS_00021404	1	0	1	0
TCONS_00021418	1	1	0	0
TCONS_00021452	1	0	1	1
TCONS_00021453	1	0	1	0
TCONS_00021468	1	1	1	1
TCONS_00021478	1	0	1	0
TCONS_00021485	1	0	1	0
TCONS_00021535	1	0	1	0
TCONS_00021560	1	0	1	0
TCONS_00021566	1	0	0	1
TCONS_00021574	1	0	1	0
TCONS_00021612	1	0	1	0
TCONS_00021613	1	0	1	0
TCONS_00021618	1	0	1	0
TCONS_00021619	1	0	1	0
TCONS_00021652	1	0	1	0
TCONS_00021663	1	0	1	0
TCONS_00021708	1	0	1	0
TCONS_00021737	1	1	1	1
TCONS_00021747	1	1	1	1
TCONS_00021768	1	0	1	0
TCONS_00021789	0	1	1	1
TCONS_00021800	0	1	1	0
TCONS_00021807	0	1	1	0
TCONS_00021815	0	1	0	1
TCONS_00021823	0	1	0	1
TCONS_00021824	0	1	0	1
TCONS_00021837	0	1	0	1
TCONS_00021845	0	1	0	1
TCONS_00021865	0	1	1	1
TCONS_00021869	0	1	1	1
TCONS_00021871	0	1	1	1
TCONS_00021883	0	1	0	1
TCONS_00021902	0	1	0	1
TCONS_00021925	0	1	1	0
TCONS_00021968	0	1	0	1
TCONS_00021982	0	1	1	0
TCONS_00022012	0	1	1	0
TCONS_00022020	0	1	0	1
TCONS_00022029	0	1	0	1
TCONS_00022049	0	1	0	1
TCONS_00022050	0	1	1	0
TCONS_00022052	0	1	1	0
TCONS_00022056	0	1	1	0
TCONS_00022070	0	1	1	0
TCONS_00022072	0	1	1	0
TCONS_00022077	0	1	0	1
TCONS_00022079	0	1	1	1
TCONS_00022124	0	1	1	0
TCONS_00022134	0	1	0	1
TCONS_00022135	0	1	0	1
TCONS_00022137	0	1	0	1
TCONS_00022139	0	1	0	1
TCONS_00022158	0	1	1	0
TCONS_00022160	0	1	1	1
TCONS_00022163	0	1	0	1
TCONS_00022164	0	1	0	1
TCONS_00022165	0	1	0	1
TCONS_00022171	0	1	1	1
TCONS_00022176	0	1	0	1
TCONS_00022205	0	1	0	1
TCONS_00022227	0	1	1	0
TCONS_00022241	0	1	1	1
TCONS_00022243	0	1	0	1
TCONS_00022247	0	1	1	1
TCONS_00022267	0	1	1	0
TCONS_00022278	0	1	0	1
TCONS_00022279	0	1	0	1
TCONS_00022281	0	1	0	1
TCONS_00022296	0	1	0	1
TCONS_00022327	0	1	0	1
TCONS_00022346	0	1	0	1
TCONS_00022399	0	1	1	0
TCONS_00022412	0	1	1	0
TCONS_00022427	0	1	1	0
TCONS_00022428	0	1	0	1
TCONS_00022445	0	1	0	1
TCONS_00022448	0	1	1	1
TCONS_00022456	0	1	0	1
TCONS_00022469	0	1	0	1
TCONS_00022474	0	1	1	0
TCONS_00022478	0	1	1	1
TCONS_00022480	0	1	0	1
TCONS_00022481	0	1	1	0
TCONS_00022500	0	1	1	0
TCONS_00022513	0	1	0	1
TCONS_00022534	0	1	0	1
TCONS_00022535	0	1	0	1
TCONS_00022536	0	1	1	0
TCONS_00022537	0	1	0	1
TCONS_00022546	0	1	1	1
TCONS_00022558	0	1	1	1
TCONS_00022563	0	1	0	1
TCONS_00022565	0	1	0	1
TCONS_00022566	0	1	0	1
TCONS_00022580	0	1	1	1
TCONS_00022584	0	1	0	1
TCONS_00022588	0	1	1	0
TCONS_00022615	0	1	1	1
TCONS_00022617	0	1	0	1
TCONS_00022620	0	1	1	1
TCONS_00022623	0	1	1	1
TCONS_00022624	0	1	1	0
TCONS_00022656	0	1	1	0
TCONS_00022660	0	1	1	1
TCONS_00022670	0	1	1	0
TCONS_00022717	0	1	1	0
TCONS_00022720	0	1	1	0
TCONS_00022722	0	1	1	0
TCONS_00022724	0	1	0	1
TCONS_00022726	0	1	0	1
TCONS_00022785	0	1	0	1
TCONS_00022790	0	1	0	1
TCONS_00022802	0	1	0	1
TCONS_00022820	0	1	1	1
TCONS_00022821	0	1	0	1
TCONS_00022822	0	1	1	1
TCONS_00022824	0	1	0	1
TCONS_00022832	0	1	1	1
TCONS_00022843	0	1	0	1
TCONS_00022894	0	1	0	1
TCONS_00022906	0	1	0	1
TCONS_00022907	0	1	0	1
TCONS_00022916	0	1	1	1
TCONS_00022917	0	1	0	1
TCONS_00022923	0	1	1	0
TCONS_00022931	0	1	1	0
TCONS_00022941	0	1	0	1
TCONS_00022963	0	1	0	1
TCONS_00022965	0	1	0	1
TCONS_00022968	0	1	0	1
TCONS_00022969	0	1	1	0
TCONS_00022971	0	1	1	1
TCONS_00022979	0	1	1	1
TCONS_00022983	0	1	0	1
TCONS_00022989	0	1	1	0
TCONS_00022999	0	1	0	1
TCONS_00023002	0	1	1	0
TCONS_00023011	0	1	0	1
TCONS_00023017	0	1	1	1
TCONS_00023039	0	1	0	1
TCONS_00023046	0	1	1	1
TCONS_00023074	0	1	0	1
TCONS_00023092	0	1	0	1
TCONS_00023097	0	1	0	1
TCONS_00023104	0	1	1	1
TCONS_00023105	0	1	0	1
TCONS_00023126	0	1	1	1
TCONS_00023175	0	1	1	0
TCONS_00023176	0	1	1	0
TCONS_00023177	0	1	1	0
TCONS_00023181	0	1	0	1
TCONS_00023190	0	1	0	1
TCONS_00023204	0	1	0	1
TCONS_00023220	0	1	1	1
TCONS_00023226	0	1	0	1
TCONS_00023256	0	1	1	1
TCONS_00023263	0	1	1	0
TCONS_00023274	0	1	1	1
TCONS_00023276	0	1	1	1
TCONS_00023279	0	1	1	0
TCONS_00023282	0	1	0	1
TCONS_00023289	0	1	0	1
TCONS_00023294	0	1	1	1
TCONS_00023295	0	1	1	1
TCONS_00023297	0	1	1	0
TCONS_00023308	0	1	0	1
TCONS_00023310	0	1	0	1
TCONS_00023311	0	1	0	1
TCONS_00023313	0	1	0	1
TCONS_00023314	0	1	0	1
TCONS_00023320	0	1	0	1
TCONS_00023323	0	1	0	1
TCONS_00023337	0	1	0	1
TCONS_00023339	0	1	0	1
TCONS_00023350	0	1	0	1
TCONS_00023384	0	1	1	0
TCONS_00023385	0	1	1	0
TCONS_00023421	0	1	0	1
TCONS_00023437	0	1	1	1
TCONS_00023440	0	1	1	0
TCONS_00023442	0	1	0	1
TCONS_00023450	0	1	1	0
TCONS_00023453	0	1	1	0
TCONS_00023454	0	1	0	1
TCONS_00023455	0	1	1	1
TCONS_00023478	0	1	0	1
TCONS_00023511	0	1	0	1
TCONS_00023515	0	1	0	1
TCONS_00023521	0	1	0	1
TCONS_00023528	0	1	1	1
TCONS_00023529	0	1	0	1
TCONS_00023535	0	1	0	1
TCONS_00023542	0	1	1	0
TCONS_00023544	0	1	1	1
TCONS_00023547	0	1	1	1
TCONS_00023549	0	1	1	0
TCONS_00023563	0	1	1	0
TCONS_00023578	0	1	0	1
TCONS_00023581	0	1	1	1
TCONS_00023582	0	1	1	1
TCONS_00023595	0	1	1	1
TCONS_00023606	0	1	1	1
TCONS_00023647	0	1	1	0
TCONS_00023677	0	1	0	1
TCONS_00023687	0	1	0	1
TCONS_00023695	0	1	0	1
TCONS_00023705	0	1	0	1
TCONS_00023709	0	1	0	1
TCONS_00023719	0	1	0	1
TCONS_00023720	0	1	0	1
TCONS_00023721	0	1	0	1
TCONS_00023744	0	1	0	1
TCONS_00023764	0	1	0	1
TCONS_00023765	0	1	0	1
TCONS_00023788	0	1	0	1
TCONS_00023809	0	1	1	1
TCONS_00023814	0	1	0	1
TCONS_00023825	0	1	0	1
TCONS_00023860	0	1	0	1
TCONS_00023864	0	1	1	1
TCONS_00023885	0	1	1	1
TCONS_00023886	0	1	1	1
TCONS_00023887	0	1	1	1
TCONS_00023951	0	1	0	1
TCONS_00023954	0	1	0	1
TCONS_00023956	0	1	1	0
TCONS_00023973	0	1	1	0
TCONS_00023975	0	1	0	1
TCONS_00023978	0	1	1	0
TCONS_00023979	0	1	0	1
TCONS_00024013	0	1	1	0
TCONS_00024018	0	1	0	1
TCONS_00024029	0	1	1	1
TCONS_00024031	0	1	1	1
TCONS_00024036	0	1	0	1
TCONS_00024040	0	1	0	1
TCONS_00024051	0	1	0	1
TCONS_00024060	0	1	1	0
TCONS_00024062	0	1	1	1
TCONS_00024063	0	1	1	1
TCONS_00024071	0	1	0	1
TCONS_00024077	0	1	1	0
TCONS_00024083	0	1	0	1
TCONS_00024104	0	1	0	1
TCONS_00024108	0	1	0	1
TCONS_00024109	0	1	0	1
TCONS_00024110	0	1	0	1
TCONS_00024122	0	1	1	0
TCONS_00024125	0	1	0	1
TCONS_00024126	0	1	0	1
TCONS_00024133	0	1	1	1
TCONS_00024136	0	1	0	1
TCONS_00024138	0	1	1	0
TCONS_00024149	0	1	1	1
TCONS_00024173	0	1	0	1
TCONS_00024174	0	1	0	1
TCONS_00024175	0	1	1	1
TCONS_00024186	0	1	1	1
TCONS_00024187	0	1	1	1
TCONS_00024188	0	1	0	1
TCONS_00024190	0	1	1	1
TCONS_00024192	0	1	1	0
TCONS_00024231	0	1	0	1
TCONS_00024232	0	1	0	1
TCONS_00024240	0	1	0	1
TCONS_00024244	0	1	1	0
TCONS_00024246	0	1	1	1
TCONS_00024262	0	1	0	1
TCONS_00024266	0	1	0	1
TCONS_00024269	0	1	1	1
TCONS_00024271	0	1	0	1
TCONS_00024278	0	1	1	0
TCONS_00024282	0	1	1	0
TCONS_00024285	0	1	1	1
TCONS_00024288	0	1	0	1
TCONS_00024290	0	1	1	0
TCONS_00024299	0	1	0	1
TCONS_00024312	0	1	1	0
TCONS_00024314	0	1	1	0
TCONS_00024333	0	1	0	1
TCONS_00024335	0	1	1	0
TCONS_00024339	0	1	0	1
TCONS_00024359	0	1	0	1
TCONS_00024360	0	1	1	1
TCONS_00024363	0	1	1	1
TCONS_00024388	0	1	1	1
TCONS_00024394	0	1	0	1
TCONS_00024399	0	1	1	1
TCONS_00024400	0	1	0	1
TCONS_00024406	0	1	0	1
TCONS_00024407	0	1	1	1
TCONS_00024418	0	1	0	1
TCONS_00024420	0	1	1	1
TCONS_00024421	0	1	0	1
TCONS_00024422	0	1	0	1
TCONS_00024423	0	1	0	1
TCONS_00024452	0	1	1	1
TCONS_00024454	0	1	0	1
TCONS_00024468	0	1	1	1
TCONS_00024469	0	1	1	1
TCONS_00024482	0	1	1	0
TCONS_00024486	0	1	1	0
TCONS_00024506	0	1	0	1
TCONS_00024509	0	1	0	1
TCONS_00024510	0	1	0	1
TCONS_00024518	0	1	0	1
TCONS_00024524	0	1	0	1
TCONS_00024526	0	1	0	1
TCONS_00024542	0	1	1	0
TCONS_00024567	0	1	1	0
TCONS_00024580	0	1	0	1
TCONS_00024608	0	1	0	1
TCONS_00024617	0	1	0	1
TCONS_00024621	0	1	0	1
TCONS_00024638	0	1	1	1
TCONS_00024642	0	1	1	0
TCONS_00024646	0	1	0	1
TCONS_00024652	0	1	0	1
TCONS_00024656	0	1	1	0
TCONS_00024662	0	1	0	1
TCONS_00024888	0	1	1	1
TCONS_00024898	0	1	1	1
TCONS_00024903	0	1	0	1
TCONS_00025037	0	0	1	1
TCONS_00025054	0	0	1	1
TCONS_00025071	0	0	1	1
TCONS_00025127	0	0	1	1
TCONS_00025137	0	0	1	1
TCONS_00025179	0	0	1	1
TCONS_00025194	0	0	1	1
TCONS_00025229	0	0	1	1
TCONS_00025328	0	0	1	1
TCONS_00025352	0	0	1	1
TCONS_00025401	0	0	1	1
TCONS_00025402	0	0	1	1
TCONS_00025407	0	0	1	1
TCONS_00025419	0	0	1	1
TCONS_00025430	0	0	1	1
TCONS_00025452	0	0	1	1
TCONS_00025458	0	0	1	1
TCONS_00025481	0	0	1	1
TCONS_00025492	0	0	1	1
TCONS_00025518	0	0	1	1
TCONS_00025675	0	0	1	1
TCONS_00025697	0	0	1	1
TCONS_00025698	0	0	1	1
TCONS_00025798	0	0	1	1
TCONS_00025861	0	0	1	1
TCONS_00025913	0	0	1	1
TCONS_00026053	0	0	1	1
TCONS_00026172	0	0	1	1
TCONS_00026215	0	0	1	1
TCONS_00026376	0	0	1	1
TCONS_00026377	0	0	1	1
TCONS_00026440	0	0	1	1
TCONS_00026470	0	0	1	1
TCONS_00026473	0	0	1	1
TCONS_00026529	0	0	1	1
TCONS_00026546	0	0	1	1
TCONS_00026555	0	0	1	1
TCONS_00026607	0	0	1	1
TCONS_00026622	0	0	1	1
TCONS_00026689	0	0	1	1
TCONS_00026694	0	0	1	1
TCONS_00026716	0	0	1	1
TCONS_00026735	0	0	1	1
TCONS_00026740	0	0	1	1
TCONS_00026756	0	0	1	1
TCONS_00026798	0	0	1	1
TCONS_00026821	0	0	1	1
TCONS_00026822	0	0	1	1
TCONS_00026844	0	0	1	1
TCONS_00026856	0	0	1	1
TCONS_00026857	0	0	1	1
TCONS_00026882	0	0	1	1
TCONS_00026898	0	0	1	1
TCONS_00026981	0	0	1	1
TCONS_00026985	0	0	1	1
TCONS_00026987	0	0	1	1
TCONS_00026989	0	0	1	1
TCONS_00026991	0	0	1	1
TCONS_00027001	0	0	1	1
TCONS_00027049	0	0	1	1
TCONS_00027072	0	0	1	1
TCONS_00027124	0	0	1	1
TCONS_00027237	0	0	1	1
TCONS_00027303	0	0	1	1
TCONS_00027305	0	0	1	1
TCONS_00027375	0	0	1	1
TCONS_00027385	0	0	1	1
TCONS_00027420	0	0	1	1
TCONS_00027444	0	0	1	1
TCONS_00027518	0	0	1	1
TCONS_00027524	0	0	1	1
TCONS_00027525	0	0	1	1
TCONS_00027526	0	0	1	1
TCONS_00027530	0	0	1	1
TCONS_00027537	0	0	1	1
TCONS_00027543	0	0	1	1
TCONS_00027548	0	0	1	1
TCONS_00027549	0	0	1	1
TCONS_00027600	0	0	1	1
TCONS_00027709	0	0	1	1
TCONS_00027775	0	0	1	1
TCONS_00027776	0	0	1	1
TCONS_00027777	0	0	1	1
TCONS_00027788	0	0	1	1
TCONS_00027789	0	0	1	1
TCONS_00027838	0	0	1	1
TCONS_00027990	0	0	1	1
TCONS_00028154	0	0	1	1
TCONS_00030319	1	0	1	0
TCONS_00030320	1	1	0	0
TCONS_00030341	1	1	1	1
TCONS_00030342	1	1	1	1
TCONS_00030348	1	1	0	0
TCONS_00030350	1	1	1	1
TCONS_00030353	1	1	1	1
TCONS_00030354	1	0	1	0
TCONS_00030355	1	1	1	1
TCONS_00030357	1	0	1	1
TCONS_00030366	1	1	1	0
TCONS_00030369	1	1	0	0
TCONS_00030371	1	1	1	0
TCONS_00030372	1	0	1	0
TCONS_00030375	1	0	1	0
TCONS_00030378	1	0	1	0
TCONS_00030382	1	0	0	1
TCONS_00030383	1	0	1	1
TCONS_00030384	1	0	0	1
TCONS_00030385	1	0	1	0
TCONS_00030387	1	0	1	1
TCONS_00030393	1	0	1	0
TCONS_00030400	1	1	0	1
TCONS_00030412	1	0	1	0
TCONS_00030417	1	0	1	0
TCONS_00030428	1	1	1	0
TCONS_00030433	1	1	1	1
TCONS_00030435	1	0	1	1
TCONS_00030471	1	1	0	1
TCONS_00030472	1	1	0	1
TCONS_00030478	1	1	1	0
TCONS_00030483	1	1	0	0
TCONS_00030502	1	0	0	1
TCONS_00030503	1	0	1	0
TCONS_00030507	1	0	1	1
TCONS_00030508	1	1	0	0
TCONS_00030515	1	1	1	0
TCONS_00030518	1	0	1	0
TCONS_00030522	1	0	1	0
TCONS_00030523	1	1	1	1
TCONS_00030525	1	1	0	1
TCONS_00030526	1	1	1	1
TCONS_00030529	1	0	0	1
TCONS_00030546	1	0	1	0
TCONS_00030551	1	0	1	0
TCONS_00030552	1	1	1	0
TCONS_00030557	1	0	1	0
TCONS_00030558	1	0	1	0
TCONS_00030569	1	1	1	1
TCONS_00030571	1	1	0	0
TCONS_00030572	1	1	1	1
TCONS_00030574	1	1	1	1
TCONS_00030576	1	0	1	0
TCONS_00030577	1	0	1	0
TCONS_00030605	1	0	1	0
TCONS_00030611	1	0	1	0
TCONS_00030615	1	1	0	1
TCONS_00030636	1	0	1	0
TCONS_00030657	1	1	0	0
TCONS_00030658	1	1	0	0
TCONS_00030660	1	1	0	0
TCONS_00030664	1	1	1	1
TCONS_00030673	1	1	1	0
TCONS_00030675	1	1	1	0
TCONS_00030676	1	0	1	0
TCONS_00030677	1	0	1	1
TCONS_00030679	1	0	1	1
TCONS_00030741	1	1	1	1
TCONS_00030743	1	0	1	0
TCONS_00030754	1	1	0	1
TCONS_00030756	1	0	0	1
TCONS_00030763	1	1	0	1
TCONS_00030772	1	0	1	0
TCONS_00030774	1	0	1	0
TCONS_00030781	1	0	0	1
TCONS_00030782	1	0	1	0
TCONS_00030790	1	0	1	0
TCONS_00030794	1	1	1	1
TCONS_00030797	1	0	0	1
TCONS_00030799	1	1	1	1
TCONS_00030817	1	0	1	0
TCONS_00030819	1	1	0	1
TCONS_00030820	1	1	0	1
TCONS_00030824	1	1	1	1
TCONS_00030826	1	1	0	0
TCONS_00030834	1	0	1	0
TCONS_00030839	1	0	1	0
TCONS_00030842	1	0	1	0
TCONS_00030849	1	1	1	1
TCONS_00030859	1	0	0	1
TCONS_00030860	1	0	1	0
TCONS_00030864	1	1	0	1
TCONS_00030868	1	1	1	1
TCONS_00030882	1	0	1	0
TCONS_00030883	1	0	1	0
TCONS_00030887	1	0	0	1
TCONS_00030888	1	1	1	1
TCONS_00030890	1	1	1	1
TCONS_00030897	1	0	1	0
TCONS_00030898	1	0	1	0
TCONS_00030899	1	0	1	0
TCONS_00030904	1	0	1	0
TCONS_00030907	1	0	1	0
TCONS_00030909	1	1	1	1
TCONS_00030914	1	1	0	0
TCONS_00030918	1	0	1	0
TCONS_00030925	1	0	0	1
TCONS_00030926	1	1	0	0
TCONS_00030930	1	1	0	1
TCONS_00030933	1	1	0	1
TCONS_00030935	1	0	1	0
TCONS_00030936	1	1	1	0
TCONS_00030939	1	1	0	0
TCONS_00030942	1	1	1	1
TCONS_00030943	1	0	0	1
TCONS_00030944	1	1	1	1
TCONS_00030947	1	0	1	0
TCONS_00030948	1	0	1	0
TCONS_00030949	1	0	1	0
TCONS_00030952	1	0	1	0
TCONS_00030955	1	0	1	0
TCONS_00030956	1	0	1	0
TCONS_00030968	1	0	1	0
TCONS_00030975	1	1	0	0
TCONS_00030976	1	1	0	0
TCONS_00030977	1	1	0	1
TCONS_00030984	1	0	1	1
TCONS_00030997	1	0	1	0
TCONS_00031007	1	0	1	0
TCONS_00031015	1	0	1	0
TCONS_00031019	1	0	1	0
TCONS_00031024	1	1	1	0
TCONS_00031026	1	1	1	1
TCONS_00031027	1	0	1	0
TCONS_00031053	1	1	1	1
TCONS_00031054	1	1	1	1
TCONS_00031057	1	1	1	1
TCONS_00031059	1	0	1	0
TCONS_00031066	1	1	0	1
TCONS_00031068	1	1	0	0
TCONS_00031069	1	1	0	1
TCONS_00031071	1	0	1	0
TCONS_00031078	1	0	1	0
TCONS_00031089	1	1	1	0
TCONS_00031095	1	0	1	0
TCONS_00031099	1	1	0	1
TCONS_00031101	1	1	0	1
TCONS_00031102	1	0	0	1
TCONS_00031103	1	1	1	1
TCONS_00031105	1	1	1	1
TCONS_00031106	1	1	1	1
TCONS_00031107	1	1	0	0
TCONS_00031108	1	1	0	1
TCONS_00031109	1	1	1	1
TCONS_00031110	1	0	1	0
TCONS_00031122	1	0	1	0
TCONS_00031123	1	1	1	0
TCONS_00031126	1	0	1	1
TCONS_00031127	1	1	1	0
TCONS_00031128	1	0	0	1
TCONS_00031144	1	1	1	0
TCONS_00031145	1	1	0	0
TCONS_00031146	1	1	1	1
TCONS_00031151	1	0	0	1
TCONS_00031152	1	0	1	0
TCONS_00031161	1	0	1	0
TCONS_00031163	1	1	1	1
TCONS_00031174	1	1	1	1
TCONS_00031176	1	1	1	1
TCONS_00031181	1	0	0	1
TCONS_00031188	1	1	0	0
TCONS_00031215	1	1	1	0
TCONS_00031232	1	1	1	1
TCONS_00031233	1	1	0	1
TCONS_00031243	1	1	1	1
TCONS_00031244	1	1	0	0
TCONS_00031290	1	0	1	0
TCONS_00031309	1	1	1	1
TCONS_00031368	1	0	1	0
TCONS_00031380	0	1	1	1
TCONS_00031388	0	1	1	1
TCONS_00031394	0	1	1	1
TCONS_00031401	0	1	1	1
TCONS_00031408	0	1	1	0
TCONS_00031409	0	1	1	1
TCONS_00031412	0	1	1	0
TCONS_00031426	0	1	1	0
TCONS_00031436	0	1	0	1
TCONS_00031458	0	1	1	1
TCONS_00031459	0	1	0	1
TCONS_00031465	0	1	0	1
TCONS_00031495	0	1	1	1
TCONS_00031527	0	1	1	0
TCONS_00031528	0	1	1	0
TCONS_00031529	0	1	1	1
TCONS_00031567	0	1	1	1
TCONS_00031574	0	1	0	1
TCONS_00031581	0	1	0	1
TCONS_00031601	0	1	0	1
TCONS_00031608	0	1	0	1
TCONS_00031615	0	1	0	1
TCONS_00031620	0	1	0	1
TCONS_00031621	0	1	1	1
TCONS_00031624	0	1	0	1
TCONS_00031631	0	1	1	0
TCONS_00031639	0	1	0	1
TCONS_00031642	0	1	0	1
TCONS_00031643	0	1	0	1
TCONS_00031645	0	1	0	1
TCONS_00031656	0	1	0	1
TCONS_00031659	0	1	0	1
TCONS_00031668	0	1	1	1
TCONS_00031707	0	1	0	1
TCONS_00031711	0	1	0	1
TCONS_00031714	0	1	1	1
TCONS_00031718	0	1	0	1
TCONS_00031719	0	1	1	1
TCONS_00031722	0	1	1	0
TCONS_00031735	0	1	0	1
TCONS_00031738	0	1	1	1
TCONS_00031740	0	1	0	1
TCONS_00031845	0	0	1	1
TCONS_00031849	0	0	1	1
TCONS_00031875	0	0	1	1
TCONS_00031926	0	0	1	1
TCONS_00032018	0	0	1	1
TCONS_00032042	0	0	1	1
TCONS_00032057	0	0	1	1
TCONS_00032098	0	0	1	1
TCONS_00032120	0	0	1	1
TCONS_00032127	0	0	1	1
TCONS_00032128	0	0	1	1
TCONS_00032142	0	0	1	1
TCONS_00032168	0	0	1	1
TCONS_00032203	0	0	1	1
TCONS_00032220	0	0	1	1
TCONS_00032224	0	0	1	1
TCONS_00032230	0	0	1	1
TCONS_00032255	0	0	1	1
TCONS_00032283	0	0	1	1
TCONS_00032284	0	0	1	1
TCONS_00032314	0	0	1	1
TCONS_00032729	1	0	1	0
TCONS_00032732	1	0	1	1
TCONS_00032733	1	1	1	1
TCONS_00032748	1	0	1	0
TCONS_00032752	1	0	1	0
TCONS_00032753	1	1	0	0
TCONS_00032759	1	1	1	1
TCONS_00032760	1	1	1	0
TCONS_00032762	1	0	1	0
TCONS_00032763	1	0	1	1
TCONS_00032764	1	0	1	0
TCONS_00032776	1	1	1	1
TCONS_00032782	1	0	0	1
TCONS_00032783	1	0	0	1
TCONS_00032789	1	1	1	0
TCONS_00032791	1	0	0	1
TCONS_00032792	1	0	1	1
TCONS_00032798	1	0	1	0
TCONS_00032800	1	1	0	0
TCONS_00032803	1	0	1	0
TCONS_00032809	1	0	1	1
TCONS_00032811	1	0	1	1
TCONS_00032825	1	0	1	1
TCONS_00032830	1	1	0	1
TCONS_00032832	1	1	1	1
TCONS_00032835	1	1	0	0
TCONS_00032837	1	1	0	1
TCONS_00032838	1	1	0	1
TCONS_00032839	1	1	0	0
TCONS_00032840	1	1	0	1
TCONS_00032849	1	1	1	1
TCONS_00032853	1	1	0	0
TCONS_00032860	1	1	1	1
TCONS_00032863	1	0	1	1
TCONS_00032872	1	0	0	1
TCONS_00032880	1	1	1	1
TCONS_00032881	1	0	1	0
TCONS_00032882	1	0	1	1
TCONS_00032883	1	1	1	1
TCONS_00032884	1	0	1	1
TCONS_00032887	1	1	1	1
TCONS_00032890	1	1	0	1
TCONS_00032911	1	1	1	1
TCONS_00032912	1	1	1	1
TCONS_00032913	1	1	1	1
TCONS_00032914	1	1	1	0
TCONS_00032915	1	1	1	1
TCONS_00032917	1	1	1	1
TCONS_00032918	1	1	0	1
TCONS_00032919	1	1	0	1
TCONS_00032923	1	0	1	0
TCONS_00032926	1	0	1	0
TCONS_00032936	1	0	0	1
TCONS_00032941	1	0	1	0
TCONS_00032946	1	0	1	0
TCONS_00032953	1	1	1	1
TCONS_00032956	1	0	1	0
TCONS_00032969	0	1	0	1
TCONS_00032989	0	1	1	1
TCONS_00032999	0	1	0	1
TCONS_00033000	0	1	0	1
TCONS_00033001	0	1	0	1
TCONS_00033009	0	1	0	1
TCONS_00033019	0	1	1	1
TCONS_00033033	0	1	0	1
TCONS_00033036	0	1	0	1
TCONS_00033041	0	1	1	1
TCONS_00033050	0	1	0	1
TCONS_00033052	0	1	1	1
TCONS_00033070	0	1	0	1
TCONS_00033073	0	1	0	1
TCONS_00033074	0	1	0	1
TCONS_00033087	0	1	0	1
TCONS_00033213	0	0	1	1
TCONS_00033220	0	0	1	1
TCONS_00033227	0	0	1	1
TCONS_00033338	1	0	1	1
TCONS_00033345	1	0	1	0
TCONS_00033347	1	0	0	1
TCONS_00033348	1	0	0	1
TCONS_00033351	1	1	1	0
TCONS_00033379	1	0	1	0
TCONS_00033391	1	1	1	0
TCONS_00033403	1	0	0	1
TCONS_00033404	1	0	0	1
TCONS_00033405	1	0	0	1
TCONS_00033420	1	0	1	0
TCONS_00033421	1	1	1	1
TCONS_00033422	1	0	0	1
TCONS_00033423	1	1	0	0
TCONS_00033425	1	1	1	1
TCONS_00033426	1	1	1	0
TCONS_00033427	1	1	1	1
TCONS_00033428	1	0	1	0
TCONS_00033429	1	0	1	1
TCONS_00033443	1	0	1	0
TCONS_00033444	1	1	1	1
TCONS_00033445	1	1	1	1
TCONS_00033446	1	1	1	1
TCONS_00033447	1	1	1	1
TCONS_00033475	1	1	1	1
TCONS_00033482	1	1	1	1
TCONS_00033484	1	1	0	1
TCONS_00033493	1	1	0	0
TCONS_00033494	1	1	1	1
TCONS_00033495	1	1	1	1
TCONS_00033512	1	1	0	0
TCONS_00033513	1	1	0	0
TCONS_00033514	1	1	0	0
TCONS_00033517	1	0	0	1
TCONS_00033537	1	0	1	0
TCONS_00033539	1	0	1	0
TCONS_00033561	1	0	0	1
TCONS_00033562	1	0	0	1
TCONS_00033563	1	0	0	1
TCONS_00033565	1	0	0	1
TCONS_00033571	1	0	1	0
TCONS_00033584	1	0	1	1
TCONS_00033585	1	1	1	1
TCONS_00033586	1	1	1	1
TCONS_00033590	1	1	1	1
TCONS_00033596	1	0	1	0
TCONS_00033598	1	0	1	0
TCONS_00033600	1	0	1	0
TCONS_00033604	1	0	1	0
TCONS_00033617	1	1	0	0
TCONS_00033618	1	0	1	0
TCONS_00033619	1	1	0	0
TCONS_00033636	1	0	1	0
TCONS_00033643	1	1	0	0
TCONS_00033661	1	1	1	1
TCONS_00033691	1	0	1	0
TCONS_00033693	1	1	1	1
TCONS_00033694	1	0	0	1
TCONS_00033695	1	0	0	1
TCONS_00033707	1	1	0	0
TCONS_00033708	1	1	1	1
TCONS_00033709	1	0	1	0
TCONS_00033713	1	0	1	0
TCONS_00033718	1	0	1	0
TCONS_00033723	1	1	1	1
TCONS_00033727	1	0	1	0
TCONS_00033729	1	0	1	0
TCONS_00033733	1	0	1	0
TCONS_00033734	1	0	1	0
TCONS_00033742	1	0	1	1
TCONS_00033745	1	0	1	0
TCONS_00033747	1	1	0	0
TCONS_00033759	1	1	0	0
TCONS_00033769	1	0	0	1
TCONS_00033775	1	0	1	0
TCONS_00033780	1	0	1	0
TCONS_00033783	1	0	1	0
TCONS_00033788	1	0	1	0
TCONS_00033797	1	1	1	1
TCONS_00033798	1	1	0	1
TCONS_00033800	1	1	1	1
TCONS_00033802	1	0	1	0
TCONS_00033803	1	1	1	1
TCONS_00033807	1	1	0	1
TCONS_00033825	1	0	1	1
TCONS_00033826	1	1	0	0
TCONS_00033829	1	1	0	0
TCONS_00033836	1	1	1	1
TCONS_00033863	1	0	0	1
TCONS_00033872	1	0	1	0
TCONS_00033873	1	0	1	0
TCONS_00033876	1	0	0	1
TCONS_00033881	1	1	1	0
TCONS_00033884	1	1	1	1
TCONS_00033885	1	1	1	1
TCONS_00033891	1	1	1	0
TCONS_00033898	1	0	0	1
TCONS_00033907	1	0	0	1
TCONS_00033917	1	0	0	1
TCONS_00033925	1	1	1	1
TCONS_00033927	1	0	1	0
TCONS_00033939	1	1	1	1
TCONS_00033940	1	0	1	0
TCONS_00033948	1	1	1	1
TCONS_00033954	1	1	1	1
TCONS_00033956	1	0	1	0
TCONS_00033957	1	0	1	0
TCONS_00033958	1	1	1	0
TCONS_00033959	1	0	1	0
TCONS_00033962	1	0	1	0
TCONS_00033975	1	0	1	0
TCONS_00033976	1	0	1	0
TCONS_00034001	1	1	1	1
TCONS_00034004	1	1	1	0
TCONS_00034008	1	0	1	0
TCONS_00034014	1	1	0	1
TCONS_00034020	1	0	1	0
TCONS_00034026	1	0	0	1
TCONS_00034033	1	0	0	1
TCONS_00034036	1	1	0	1
TCONS_00034037	1	1	1	1
TCONS_00034038	1	0	1	0
TCONS_00034039	1	0	1	0
TCONS_00034050	1	0	1	0
TCONS_00034053	1	0	1	0
TCONS_00034056	1	0	1	0
TCONS_00034058	1	0	0	1
TCONS_00034060	1	1	1	1
TCONS_00034073	1	0	1	0
TCONS_00034098	1	0	1	0
TCONS_00034108	1	0	1	0
TCONS_00034116	1	1	1	1
TCONS_00034117	1	1	0	0
TCONS_00034118	1	0	0	1
TCONS_00034119	1	1	1	1
TCONS_00034120	1	1	0	1
TCONS_00034131	1	1	1	1
TCONS_00034135	1	1	0	1
TCONS_00034140	1	1	1	1
TCONS_00034160	1	0	1	0
TCONS_00034165	1	1	0	0
TCONS_00034166	1	1	1	1
TCONS_00034174	1	1	0	0
TCONS_00034188	1	0	1	0
TCONS_00034195	1	1	0	0
TCONS_00034199	1	0	1	0
TCONS_00034200	1	0	0	1
TCONS_00034203	1	1	1	1
TCONS_00034211	1	1	0	0
TCONS_00034212	1	0	1	0
TCONS_00034215	1	0	1	0
TCONS_00034216	1	1	0	1
TCONS_00034217	1	1	0	0
TCONS_00034219	1	1	0	1
TCONS_00034220	1	1	0	1
TCONS_00034224	1	0	1	0
TCONS_00034226	1	0	1	0
TCONS_00034229	1	1	0	0
TCONS_00034237	1	0	0	1
TCONS_00034243	1	1	1	0
TCONS_00034245	1	0	1	1
TCONS_00034246	1	0	0	1
TCONS_00034248	1	1	1	1
TCONS_00034249	1	1	1	1
TCONS_00034250	1	1	1	1
TCONS_00034257	1	1	1	0
TCONS_00034276	1	0	1	1
TCONS_00034277	1	1	1	1
TCONS_00034285	1	1	0	1
TCONS_00034292	1	1	0	0
TCONS_00034293	1	0	1	1
TCONS_00034318	1	1	0	0
TCONS_00034320	1	1	1	1
TCONS_00034323	1	1	1	1
TCONS_00034332	1	0	1	0
TCONS_00034333	1	0	1	0
TCONS_00034343	1	0	1	0
TCONS_00034347	1	1	1	1
TCONS_00034353	1	1	0	1
TCONS_00034354	1	0	1	1
TCONS_00034359	1	0	1	0
TCONS_00034382	1	0	1	0
TCONS_00034400	1	1	0	0
TCONS_00034402	1	0	1	0
TCONS_00034424	1	1	1	1
TCONS_00034429	1	0	1	0
TCONS_00034430	1	1	1	1
TCONS_00034433	1	0	0	1
TCONS_00034435	1	1	0	1
TCONS_00034453	1	0	1	1
TCONS_00034459	1	1	0	0
TCONS_00034462	1	1	1	0
TCONS_00034466	1	1	0	1
TCONS_00034467	1	0	0	1
TCONS_00034470	1	1	0	0
TCONS_00034474	1	0	0	1
TCONS_00034475	1	0	1	1
TCONS_00034476	1	0	1	1
TCONS_00034477	1	1	1	1
TCONS_00034487	1	1	1	1
TCONS_00034495	1	0	1	1
TCONS_00034496	1	1	1	1
TCONS_00034497	1	1	0	0
TCONS_00034498	1	1	1	1
TCONS_00034500	1	1	0	0
TCONS_00034507	1	1	0	1
TCONS_00034509	1	1	0	1
TCONS_00034512	1	1	0	1
TCONS_00034519	1	0	1	0
TCONS_00034522	1	1	0	1
TCONS_00034529	1	0	1	0
TCONS_00034530	1	1	0	0
TCONS_00034534	1	0	1	0
TCONS_00034547	1	0	0	1
TCONS_00034556	1	0	1	1
TCONS_00034561	1	0	1	1
TCONS_00034562	1	0	1	0
TCONS_00034565	1	0	1	0
TCONS_00034570	1	0	1	1
TCONS_00034573	1	1	0	1
TCONS_00034578	1	0	1	0
TCONS_00034579	1	1	1	1
TCONS_00034581	1	0	1	0
TCONS_00034598	1	1	0	0
TCONS_00034601	1	1	0	0
TCONS_00034612	1	1	1	0
TCONS_00034614	1	0	1	0
TCONS_00034622	1	0	0	1
TCONS_00034635	1	0	1	0
TCONS_00034658	1	0	1	0
TCONS_00034662	1	0	1	0
TCONS_00034663	1	1	0	0
TCONS_00034664	1	0	1	0
TCONS_00034666	1	0	0	1
TCONS_00034667	1	1	0	1
TCONS_00034669	1	1	1	1
TCONS_00034671	1	1	1	0
TCONS_00034679	1	0	0	1
TCONS_00034689	1	1	1	0
TCONS_00034691	1	0	1	0
TCONS_00034701	1	0	1	0
TCONS_00034707	1	1	0	0
TCONS_00034708	1	1	1	1
TCONS_00034739	1	1	0	0
TCONS_00034751	1	0	1	1
TCONS_00034771	1	0	1	0
TCONS_00034783	1	0	1	1
TCONS_00034784	1	0	1	1
TCONS_00034785	1	0	0	1
TCONS_00034787	1	0	0	1
TCONS_00034788	1	0	1	1
TCONS_00034790	1	0	1	1
TCONS_00034799	1	1	1	0
TCONS_00034800	1	1	1	0
TCONS_00034815	1	1	1	0
TCONS_00034821	1	1	0	1
TCONS_00034822	1	1	1	0
TCONS_00034825	1	0	1	1
TCONS_00034827	1	1	1	1
TCONS_00034830	1	0	1	0
TCONS_00034858	1	0	0	1
TCONS_00034859	1	1	1	1
TCONS_00034866	1	1	1	1
TCONS_00034873	1	0	1	0
TCONS_00034874	1	1	1	1
TCONS_00034877	1	1	0	0
TCONS_00034879	1	1	1	1
TCONS_00034888	1	1	1	0
TCONS_00034889	1	1	1	1
TCONS_00034890	1	1	1	1
TCONS_00034891	1	1	1	1
TCONS_00034892	1	1	0	1
TCONS_00034893	1	0	0	1
TCONS_00034894	1	1	0	1
TCONS_00034904	1	0	0	1
TCONS_00034907	1	1	0	0
TCONS_00034908	1	0	1	0
TCONS_00034917	1	0	1	0
TCONS_00034918	1	0	1	0
TCONS_00034925	1	0	1	0
TCONS_00034930	1	0	1	0
TCONS_00034933	1	1	1	0
TCONS_00034939	1	0	0	1
TCONS_00034941	1	0	1	0
TCONS_00034945	1	0	1	0
TCONS_00034950	1	1	0	1
TCONS_00034953	1	1	1	1
TCONS_00034956	1	0	1	0
TCONS_00034976	1	0	1	0
TCONS_00034977	1	0	1	0
TCONS_00034982	1	1	1	0
TCONS_00034990	1	1	1	1
TCONS_00034995	1	0	1	0
TCONS_00034996	1	0	1	0
TCONS_00035001	1	0	1	0
TCONS_00035002	1	1	0	0
TCONS_00035003	1	0	1	0
TCONS_00035008	1	1	1	0
TCONS_00035016	1	0	1	1
TCONS_00035021	1	1	1	1
TCONS_00035031	1	1	1	1
TCONS_00035034	1	0	0	1
TCONS_00035035	1	1	0	0
TCONS_00035036	1	1	1	1
TCONS_00035038	1	0	0	1
TCONS_00035040	1	1	1	0
TCONS_00035051	1	1	1	1
TCONS_00035054	1	1	1	1
TCONS_00035060	1	0	0	1
TCONS_00035076	1	0	1	0
TCONS_00035077	1	0	1	0
TCONS_00035080	1	0	0	1
TCONS_00035089	1	0	0	1
TCONS_00035122	1	1	0	0
TCONS_00035128	1	1	0	0
TCONS_00035129	1	1	1	0
TCONS_00035134	1	0	1	0
TCONS_00035139	1	1	0	1
TCONS_00035142	1	0	1	0
TCONS_00035147	1	1	1	0
TCONS_00035152	1	0	1	0
TCONS_00035154	1	1	1	1
TCONS_00035155	1	1	1	1
TCONS_00035156	1	1	1	1
TCONS_00035168	1	0	1	0
TCONS_00035190	1	0	1	0
TCONS_00035191	1	1	1	1
TCONS_00035194	1	1	1	1
TCONS_00035201	1	0	0	1
TCONS_00035202	1	0	0	1
TCONS_00035212	1	0	1	0
TCONS_00035216	1	1	1	0
TCONS_00035229	1	0	1	0
TCONS_00035231	1	0	1	0
TCONS_00035232	1	1	1	1
TCONS_00035233	1	1	1	1
TCONS_00035234	1	1	0	1
TCONS_00035235	1	1	0	1
TCONS_00035236	1	1	1	1
TCONS_00035244	1	1	0	0
TCONS_00035245	1	1	0	0
TCONS_00035250	1	0	1	0
TCONS_00035251	1	0	1	0
TCONS_00035264	1	1	1	1
TCONS_00035266	1	1	1	1
TCONS_00035267	1	1	1	1
TCONS_00035271	1	0	1	0
TCONS_00035272	1	1	0	1
TCONS_00035276	1	0	1	0
TCONS_00035282	1	1	1	1
TCONS_00035284	1	1	0	0
TCONS_00035324	1	1	1	0
TCONS_00035328	1	0	1	0
TCONS_00035356	1	1	1	1
TCONS_00035415	1	1	1	1
TCONS_00035417	1	0	1	0
TCONS_00035447	1	0	1	0
TCONS_00035477	1	1	0	1
TCONS_00035478	1	1	1	1
TCONS_00035479	1	1	1	1
TCONS_00035482	1	1	0	1
TCONS_00035503	1	0	1	0
TCONS_00035515	1	0	1	0
TCONS_00035545	1	0	0	1
TCONS_00035622	0	1	0	1
TCONS_00035652	0	1	0	1
TCONS_00035674	0	1	0	1
TCONS_00035675	0	1	1	1
TCONS_00035701	0	1	0	1
TCONS_00035702	0	1	0	1
TCONS_00035716	0	1	0	1
TCONS_00035757	0	1	1	0
TCONS_00035763	0	1	1	1
TCONS_00035792	0	1	1	1
TCONS_00035793	0	1	0	1
TCONS_00035805	0	1	0	1
TCONS_00035806	0	1	1	1
TCONS_00035807	0	1	1	1
TCONS_00035808	0	1	0	1
TCONS_00035826	0	1	1	1
TCONS_00035828	0	1	0	1
TCONS_00035830	0	1	1	1
TCONS_00035840	0	1	0	1
TCONS_00035858	0	1	0	1
TCONS_00035862	0	1	0	1
TCONS_00035901	0	1	0	1
TCONS_00035906	0	1	0	1
TCONS_00035912	0	1	1	0
TCONS_00035927	0	1	0	1
TCONS_00035944	0	1	0	1
TCONS_00035945	0	1	0	1
TCONS_00035962	0	1	0	1
TCONS_00035983	0	1	0	1
TCONS_00035993	0	1	1	0
TCONS_00036005	0	1	1	0
TCONS_00036015	0	1	1	1
TCONS_00036018	0	1	0	1
TCONS_00036022	0	1	1	1
TCONS_00036028	0	1	0	1
TCONS_00036031	0	1	0	1
TCONS_00036032	0	1	0	1
TCONS_00036033	0	1	0	1
TCONS_00036035	0	1	0	1
TCONS_00036037	0	1	1	1
TCONS_00036039	0	1	1	0
TCONS_00036043	0	1	1	1
TCONS_00036072	0	1	0	1
TCONS_00036078	0	1	0	1
TCONS_00036081	0	1	0	1
TCONS_00036123	0	1	1	0
TCONS_00036126	0	1	0	1
TCONS_00036136	0	1	1	0
TCONS_00036140	0	1	1	0
TCONS_00036143	0	1	1	1
TCONS_00036146	0	1	0	1
TCONS_00036157	0	1	1	1
TCONS_00036164	0	1	0	1
TCONS_00036171	0	1	1	1
TCONS_00036172	0	1	0	1
TCONS_00036175	0	1	1	1
TCONS_00036180	0	1	0	1
TCONS_00036184	0	1	0	1
TCONS_00036193	0	1	0	1
TCONS_00036215	0	1	1	0
TCONS_00036216	0	1	0	1
TCONS_00036219	0	1	0	1
TCONS_00036222	0	1	1	0
TCONS_00036233	0	1	0	1
TCONS_00036235	0	1	0	1
TCONS_00036237	0	1	1	0
TCONS_00036248	0	1	0	1
TCONS_00036274	0	1	0	1
TCONS_00036286	0	1	0	1
TCONS_00036287	0	1	0	1
TCONS_00036288	0	1	0	1
TCONS_00036290	0	1	1	1
TCONS_00036294	0	1	0	1
TCONS_00036296	0	1	0	1
TCONS_00036308	0	1	0	1
TCONS_00036309	0	1	1	1
TCONS_00036312	0	1	1	1
TCONS_00036314	0	1	1	0
TCONS_00036316	0	1	1	1
TCONS_00036342	0	1	1	0
TCONS_00036343	0	1	1	0
TCONS_00036351	0	1	1	0
TCONS_00036357	0	1	1	1
TCONS_00036378	0	1	1	0
TCONS_00036382	0	1	0	1
TCONS_00036389	0	1	0	1
TCONS_00036394	0	1	0	1
TCONS_00036414	0	1	0	1
TCONS_00036423	0	1	0	1
TCONS_00036438	0	1	1	1
TCONS_00036448	0	1	0	1
TCONS_00036449	0	1	1	0
TCONS_00036450	0	1	1	1
TCONS_00036451	0	1	0	1
TCONS_00036452	0	1	1	1
TCONS_00036457	0	1	0	1
TCONS_00036458	0	1	0	1
TCONS_00036468	0	1	1	1
TCONS_00036469	0	1	1	1
TCONS_00036471	0	1	1	1
TCONS_00036477	0	1	1	0
TCONS_00036487	0	1	0	1
TCONS_00036489	0	1	0	1
TCONS_00036490	0	1	0	1
TCONS_00036492	0	1	0	1
TCONS_00036493	0	1	0	1
TCONS_00036495	0	1	0	1
TCONS_00036496	0	1	0	1
TCONS_00036497	0	1	0	1
TCONS_00036498	0	1	0	1
TCONS_00036511	0	1	0	1
TCONS_00036512	0	1	1	1
TCONS_00036515	0	1	1	1
TCONS_00036696	0	0	1	1
TCONS_00036697	0	0	1	1
TCONS_00036709	0	0	1	1
TCONS_00036711	0	0	1	1
TCONS_00036755	0	0	1	1
TCONS_00036827	0	0	1	1
TCONS_00036848	0	0	1	1
TCONS_00036870	0	0	1	1
TCONS_00036878	0	0	1	1
TCONS_00036892	0	0	1	1
TCONS_00036893	0	0	1	1
TCONS_00036922	0	0	1	1
TCONS_00036954	0	0	1	1
TCONS_00036969	0	0	1	1
TCONS_00036972	0	0	1	1
TCONS_00036977	0	0	1	1
TCONS_00036994	0	0	1	1
TCONS_00036995	0	0	1	1
TCONS_00037150	0	0	1	1
TCONS_00037157	0	0	1	1
TCONS_00037160	0	0	1	1
TCONS_00037208	0	0	1	1
TCONS_00037279	0	0	1	1
TCONS_00037301	0	0	1	1
TCONS_00037314	0	0	1	1
TCONS_00037323	0	0	1	1
TCONS_00037324	0	0	1	1
TCONS_00037357	0	0	1	1
TCONS_00037373	0	0	1	1
TCONS_00037377	0	0	1	1
TCONS_00037416	0	0	1	1
TCONS_00037449	0	0	1	1
TCONS_00037450	0	0	1	1
TCONS_00037470	0	0	1	1
TCONS_00037473	0	0	1	1
TCONS_00037483	0	0	1	1
TCONS_00037489	0	0	1	1
TCONS_00037503	0	0	1	1
TCONS_00037528	0	0	1	1
TCONS_00037531	0	0	1	1
TCONS_00037536	0	0	1	1
TCONS_00037537	0	0	1	1
TCONS_00037538	0	0	1	1
TCONS_00037539	0	0	1	1
TCONS_00037540	0	0	1	1
TCONS_00037547	0	0	1	1
TCONS_00037575	0	0	1	1
TCONS_00037578	0	0	1	1
TCONS_00037714	0	0	1	1
TCONS_00037727	0	0	1	1
TCONS_00037751	0	0	1	1
TCONS_00037772	0	0	1	1
TCONS_00037832	0	0	1	1
TCONS_00037878	0	0	1	1
TCONS_00038730	1	0	0	1
TCONS_00038739	1	0	0	1
TCONS_00038740	1	1	0	0
TCONS_00038743	1	1	0	1
TCONS_00038744	1	1	1	0
TCONS_00038745	1	1	0	1
TCONS_00038750	1	0	1	0
TCONS_00038756	1	0	1	0
TCONS_00038769	1	1	1	0
TCONS_00038774	1	0	1	0
TCONS_00038779	1	1	1	1
TCONS_00038795	1	1	1	1
TCONS_00038796	1	1	1	0
TCONS_00038814	1	1	1	1
TCONS_00038815	1	1	1	0
TCONS_00038839	1	0	1	0
TCONS_00038841	1	1	0	1
TCONS_00038842	1	0	1	0
TCONS_00038846	1	0	1	0
TCONS_00038847	1	0	1	0
TCONS_00038860	1	0	1	1
TCONS_00038861	1	0	1	1
TCONS_00038862	1	1	1	0
TCONS_00038863	1	1	1	1
TCONS_00038865	1	1	1	0
TCONS_00038867	1	1	1	1
TCONS_00038874	1	1	0	0
TCONS_00038876	1	1	0	0
TCONS_00038883	1	0	1	0
TCONS_00038884	1	1	0	0
TCONS_00038918	1	0	1	0
TCONS_00038919	1	1	0	0
TCONS_00038928	1	0	1	1
TCONS_00038929	1	0	1	0
TCONS_00038937	1	0	1	0
TCONS_00038960	1	0	1	0
TCONS_00038972	1	1	0	0
TCONS_00038983	1	1	0	1
TCONS_00038985	1	1	1	1
TCONS_00038993	1	1	1	1
TCONS_00038994	1	0	1	0
TCONS_00038997	1	0	1	1
TCONS_00039001	1	1	1	1
TCONS_00039003	1	1	1	1
TCONS_00039006	1	1	0	1
TCONS_00039015	1	0	1	1
TCONS_00039016	1	1	1	1
TCONS_00039044	1	0	1	0
TCONS_00039045	1	0	1	0
TCONS_00039071	1	1	0	0
TCONS_00039084	1	0	1	1
TCONS_00039095	1	0	1	0
TCONS_00039108	1	1	1	0
TCONS_00039133	1	1	0	0
TCONS_00039148	1	1	1	1
TCONS_00039149	1	0	1	0
TCONS_00039151	1	1	1	1
TCONS_00039158	1	1	0	1
TCONS_00039163	1	0	0	1
TCONS_00039164	1	1	1	1
TCONS_00039165	1	1	1	1
TCONS_00039168	1	1	0	1
TCONS_00039169	1	0	1	0
TCONS_00039171	1	0	0	1
TCONS_00039178	1	1	0	1
TCONS_00039188	1	1	1	1
TCONS_00039196	1	0	0	1
TCONS_00039197	1	1	0	1
TCONS_00039198	1	1	0	1
TCONS_00039201	1	0	0	1
TCONS_00039204	1	0	1	1
TCONS_00039207	1	1	0	1
TCONS_00039212	1	1	1	1
TCONS_00039213	1	0	1	0
TCONS_00039227	1	0	0	1
TCONS_00039228	1	1	1	0
TCONS_00039230	1	1	0	0
TCONS_00039240	1	1	0	1
TCONS_00039241	1	0	1	0
TCONS_00039255	1	0	1	0
TCONS_00039256	1	0	1	1
TCONS_00039260	1	0	1	0
TCONS_00039262	1	0	1	0
TCONS_00039271	1	0	1	0
TCONS_00039273	1	0	1	0
TCONS_00039274	1	1	1	1
TCONS_00039275	1	1	0	0
TCONS_00039276	1	1	1	1
TCONS_00039280	1	0	1	0
TCONS_00039294	1	0	1	0
TCONS_00039297	1	1	0	0
TCONS_00039302	1	0	1	0
TCONS_00039322	1	1	1	1
TCONS_00039324	1	1	0	0
TCONS_00039338	1	0	1	0
TCONS_00039354	1	1	1	1
TCONS_00039357	1	1	1	1
TCONS_00039358	1	1	1	1
TCONS_00039359	1	1	1	1
TCONS_00039372	1	1	1	1
TCONS_00039382	1	1	1	1
TCONS_00039384	1	0	0	1
TCONS_00039385	1	1	1	1
TCONS_00039388	1	0	1	0
TCONS_00039389	1	1	1	0
TCONS_00039390	1	1	1	0
TCONS_00039393	1	1	1	1
TCONS_00039394	1	0	0	1
TCONS_00039396	1	0	1	0
TCONS_00039400	1	0	1	1
TCONS_00039401	1	1	1	1
TCONS_00039408	1	1	0	0
TCONS_00039429	1	1	0	0
TCONS_00039431	1	0	1	0
TCONS_00039443	1	1	0	0
TCONS_00039457	1	0	1	0
TCONS_00039470	1	1	0	0
TCONS_00039480	1	0	0	1
TCONS_00039483	1	0	1	0
TCONS_00039495	1	0	1	0
TCONS_00039514	1	0	0	1
TCONS_00039515	1	0	0	1
TCONS_00039526	1	0	1	1
TCONS_00039527	1	1	0	1
TCONS_00039534	1	1	1	0
TCONS_00039535	1	1	0	0
TCONS_00039537	1	1	1	1
TCONS_00039544	1	0	1	0
TCONS_00039545	1	0	1	1
TCONS_00039546	1	1	1	1
TCONS_00039555	1	1	1	1
TCONS_00039558	1	1	1	1
TCONS_00039559	1	1	1	1
TCONS_00039560	1	1	0	1
TCONS_00039561	1	0	1	0
TCONS_00039564	1	0	1	1
TCONS_00039566	1	0	1	0
TCONS_00039567	1	1	0	1
TCONS_00039573	1	1	0	0
TCONS_00039580	1	0	1	1
TCONS_00039582	1	1	1	1
TCONS_00039583	1	1	1	1
TCONS_00039585	1	0	0	1
TCONS_00039601	1	1	0	1
TCONS_00039602	1	0	1	0
TCONS_00039604	1	1	1	1
TCONS_00039605	1	1	1	1
TCONS_00039612	1	1	1	0
TCONS_00039626	1	1	0	1
TCONS_00039633	1	0	1	0
TCONS_00039635	1	0	1	0
TCONS_00039643	1	1	0	0
TCONS_00039646	1	1	1	1
TCONS_00039653	1	0	1	0
TCONS_00039656	1	0	1	0
TCONS_00039667	1	0	1	0
TCONS_00039670	1	0	1	0
TCONS_00039675	1	1	1	1
TCONS_00039685	1	0	1	0
TCONS_00039687	1	1	1	1
TCONS_00039693	1	1	1	1
TCONS_00039699	1	0	1	0
TCONS_00039712	1	0	1	1
TCONS_00039721	1	0	1	0
TCONS_00039735	1	1	0	0
TCONS_00039737	1	0	1	0
TCONS_00039746	1	1	0	0
TCONS_00039757	1	0	1	1
TCONS_00039759	1	0	1	0
TCONS_00039764	1	0	0	1
TCONS_00039768	1	0	1	0
TCONS_00039773	1	1	1	1
TCONS_00039788	1	0	1	0
TCONS_00039801	1	0	1	0
TCONS_00039832	1	1	1	1
TCONS_00039844	1	0	1	0
TCONS_00039846	1	0	1	0
TCONS_00039867	1	0	1	0
TCONS_00039872	1	0	1	0
TCONS_00039896	1	0	1	0
TCONS_00039921	1	0	1	0
TCONS_00039930	1	0	1	0
TCONS_00039939	1	0	1	0
TCONS_00039941	1	0	1	0
TCONS_00039942	1	0	1	0
TCONS_00039948	1	0	1	0
TCONS_00039986	0	1	0	1
TCONS_00039988	0	1	0	1
TCONS_00039989	0	1	1	0
TCONS_00039991	0	1	0	1
TCONS_00039997	0	1	0	1
TCONS_00040020	0	1	0	1
TCONS_00040029	0	1	0	1
TCONS_00040034	0	1	1	0
TCONS_00040035	0	1	1	1
TCONS_00040040	0	1	0	1
TCONS_00040041	0	1	0	1
TCONS_00040059	0	1	0	1
TCONS_00040063	0	1	1	0
TCONS_00040065	0	1	0	1
TCONS_00040072	0	1	0	1
TCONS_00040074	0	1	0	1
TCONS_00040082	0	1	1	0
TCONS_00040084	0	1	0	1
TCONS_00040095	0	1	1	0
TCONS_00040097	0	1	1	1
TCONS_00040098	0	1	0	1
TCONS_00040108	0	1	1	1
TCONS_00040109	0	1	0	1
TCONS_00040122	0	1	1	1
TCONS_00040130	0	1	0	1
TCONS_00040132	0	1	0	1
TCONS_00040133	0	1	0	1
TCONS_00040139	0	1	0	1
TCONS_00040140	0	1	1	0
TCONS_00040149	0	1	1	1
TCONS_00040164	0	1	1	1
TCONS_00040165	0	1	1	0
TCONS_00040166	0	1	0	1
TCONS_00040168	0	1	0	1
TCONS_00040172	0	1	1	1
TCONS_00040175	0	1	0	1
TCONS_00040177	0	1	1	0
TCONS_00040179	0	1	1	0
TCONS_00040184	0	1	1	0
TCONS_00040196	0	1	0	1
TCONS_00040206	0	1	1	0
TCONS_00040207	0	1	1	1
TCONS_00040209	0	1	0	1
TCONS_00040220	0	1	0	1
TCONS_00040226	0	1	1	0
TCONS_00040232	0	1	1	1
TCONS_00040233	0	1	1	1
TCONS_00040249	0	1	1	0
TCONS_00040263	0	1	0	1
TCONS_00040264	0	1	0	1
TCONS_00040268	0	1	0	1
TCONS_00040269	0	1	0	1
TCONS_00040278	0	1	1	1
TCONS_00040282	0	1	1	0
TCONS_00040283	0	1	0	1
TCONS_00040289	0	1	1	1
TCONS_00040291	0	1	1	1
TCONS_00040293	0	1	0	1
TCONS_00040297	0	1	1	0
TCONS_00040298	0	1	1	1
TCONS_00040307	0	1	1	0
TCONS_00040342	0	1	1	1
TCONS_00040350	0	1	1	0
TCONS_00040356	0	1	1	1
TCONS_00040363	0	1	1	1
TCONS_00040364	0	1	0	1
TCONS_00040365	0	1	0	1
TCONS_00040367	0	1	1	1
TCONS_00040384	0	1	0	1
TCONS_00040420	0	1	1	1
TCONS_00040421	0	1	1	1
TCONS_00040444	0	1	0	1
TCONS_00040449	0	1	0	1
TCONS_00040452	0	1	1	0
TCONS_00040489	0	1	0	1
TCONS_00040499	0	1	1	0
TCONS_00040501	0	1	0	1
TCONS_00040502	0	1	0	1
TCONS_00040503	0	1	0	1
TCONS_00040604	0	0	1	1
TCONS_00040668	0	0	1	1
TCONS_00040747	0	0	1	1
TCONS_00040811	0	0	1	1
TCONS_00040846	0	0	1	1
TCONS_00040852	0	0	1	1
TCONS_00040886	0	0	1	1
TCONS_00040892	0	0	1	1
TCONS_00040893	0	0	1	1
TCONS_00040912	0	0	1	1
TCONS_00040959	0	0	1	1
TCONS_00040975	0	0	1	1
TCONS_00041022	0	0	1	1
TCONS_00041024	0	0	1	1
TCONS_00041075	0	0	1	1
TCONS_00041151	0	0	1	1
TCONS_00041167	0	0	1	1
TCONS_00041191	0	0	1	1
TCONS_00041192	0	0	1	1
TCONS_00041194	0	0	1	1
TCONS_00041677	1	0	0	1
TCONS_00041679	1	0	1	0
TCONS_00041687	1	0	1	0
TCONS_00041689	1	0	1	0
TCONS_00041692	1	1	1	0
TCONS_00041699	1	0	1	1
TCONS_00041707	1	1	1	0
TCONS_00041712	1	0	0	1
TCONS_00041713	1	0	0	1
TCONS_00041714	1	0	0	1
TCONS_00041717	1	1	1	1
TCONS_00041730	1	0	1	1
TCONS_00041739	1	1	0	1
TCONS_00041743	1	1	0	1
TCONS_00041744	1	1	0	1
TCONS_00041746	1	1	1	1
TCONS_00041753	1	0	1	0
TCONS_00041754	1	0	1	0
TCONS_00041767	1	1	1	1
TCONS_00041774	1	1	0	0
TCONS_00041776	1	0	1	0
TCONS_00041778	1	0	0	1
TCONS_00041779	1	0	0	1
TCONS_00041782	1	1	0	1
TCONS_00041791	1	1	1	1
TCONS_00041793	1	1	0	0
TCONS_00041794	1	1	1	1
TCONS_00041807	1	0	1	0
TCONS_00041808	1	1	1	1
TCONS_00041809	1	1	1	1
TCONS_00041813	1	1	1	1
TCONS_00041814	1	1	0	1
TCONS_00041815	1	1	1	1
TCONS_00041817	1	1	0	0
TCONS_00041819	1	1	0	1
TCONS_00041822	1	0	1	0
TCONS_00041826	1	0	1	0
TCONS_00041827	1	0	0	1
TCONS_00041828	1	0	1	1
TCONS_00041831	1	0	1	1
TCONS_00041835	1	0	1	1
TCONS_00041842	1	1	0	1
TCONS_00041843	1	1	1	1
TCONS_00041844	1	1	1	1
TCONS_00041849	1	1	1	1
TCONS_00041855	1	1	1	1
TCONS_00041861	1	1	0	1
TCONS_00041862	1	1	0	1
TCONS_00041864	1	1	0	1
TCONS_00041866	1	1	1	1
TCONS_00041872	1	0	1	0
TCONS_00041876	1	0	1	0
TCONS_00041878	1	1	1	1
TCONS_00041884	1	1	1	1
TCONS_00041885	1	0	1	0
TCONS_00041889	1	0	0	1
TCONS_00041890	1	1	1	1
TCONS_00041899	1	0	1	0
TCONS_00041900	1	0	1	0
TCONS_00041901	1	1	1	1
TCONS_00041902	1	1	1	0
TCONS_00041918	1	0	1	0
TCONS_00041919	1	0	1	0
TCONS_00041922	1	0	1	0
TCONS_00041923	1	1	1	1
TCONS_00041924	1	0	1	1
TCONS_00041930	1	0	1	1
TCONS_00041931	1	1	1	1
TCONS_00041932	1	1	0	1
TCONS_00041940	1	0	1	0
TCONS_00041951	1	0	1	0
TCONS_00041954	1	0	1	0
TCONS_00041970	1	1	1	1
TCONS_00042012	0	1	0	1
TCONS_00042013	0	1	1	1
TCONS_00042018	0	1	1	1
TCONS_00042019	0	1	1	0
TCONS_00042021	0	1	1	0
TCONS_00042030	0	1	0	1
TCONS_00042069	0	1	0	1
TCONS_00042071	0	1	0	1
TCONS_00042073	0	1	0	1
TCONS_00042108	0	1	0	1
TCONS_00042110	0	1	0	1
TCONS_00042113	0	1	0	1
TCONS_00042115	0	1	0	1
TCONS_00042116	0	1	0	1
TCONS_00042117	0	1	0	1
TCONS_00042124	0	1	1	0
TCONS_00042165	0	1	1	1
TCONS_00042240	0	0	1	1
TCONS_00042258	0	0	1	1
TCONS_00042269	0	0	1	1
TCONS_00042270	0	0	1	1
TCONS_00042313	0	0	1	1
TCONS_00042497	1	0	1	0
TCONS_00042498	1	1	1	1
TCONS_00042500	1	0	1	1
TCONS_00042508	1	0	1	0
TCONS_00042518	1	1	1	1
TCONS_00042522	1	1	1	0
TCONS_00042538	1	1	1	1
TCONS_00042547	1	0	1	0
TCONS_00042551	1	0	1	1
TCONS_00042553	1	0	1	1
TCONS_00042554	1	1	1	1
TCONS_00042555	1	0	0	1
TCONS_00042556	1	0	1	0
TCONS_00042558	1	0	1	0
TCONS_00042568	0	1	1	1
TCONS_00042569	0	1	0	1
TCONS_00042586	0	1	0	1
TCONS_00042587	0	1	0	1
TCONS_00042601	0	1	1	1
TCONS_00042629	0	0	1	1
TCONS_00042645	0	0	1	1
TCONS_00042650	0	0	1	1
TCONS_00042688	1	0	1	1
TCONS_00042689	1	0	1	0
TCONS_00042690	1	0	1	0
TCONS_00042691	1	0	1	0
TCONS_00042695	1	1	0	0
TCONS_00042696	1	1	0	1
TCONS_00042697	1	1	1	0
TCONS_00042704	0	1	1	0
TCONS_00042722	1	0	0	1
TCONS_00042726	1	0	1	0
TCONS_00042733	1	0	0	1
TCONS_00042768	1	1	1	1
TCONS_00042772	1	0	1	0
TCONS_00042774	0	0	1	1
TCONS_00042780	0	0	1	1
TCONS_00042781	1	0	1	0
TCONS_00042782	1	1	1	1
TCONS_00042787	1	0	1	0
TCONS_00042815	1	0	0	1
TCONS_00042820	1	1	1	1
TCONS_00042834	1	0	1	0
TCONS_00042856	1	0	1	0
TCONS_00042860	0	1	0	1
TCONS_00042867	1	0	1	0
TCONS_00042881	0	1	0	1
TCONS_00042914	1	1	1	1
TCONS_00042915	1	1	1	1
TCONS_00042916	1	0	1	1
TCONS_00042918	1	0	0	1
TCONS_00042920	1	1	1	1
TCONS_00042927	0	1	1	1
TCONS_00042944	1	1	1	1
TCONS_00042956	1	0	1	0
TCONS_00042958	1	0	1	0
TCONS_00042959	1	0	1	0
TCONS_00042960	1	0	1	0
TCONS_00042973	1	0	1	0
TCONS_00042982	1	1	0	0
TCONS_00042987	1	0	1	0
TCONS_00042993	1	1	0	1
TCONS_00043002	1	1	1	0
TCONS_00043007	1	1	1	1
TCONS_00043023	0	1	0	1
TCONS_00043025	0	1	0	1
TCONS_00043047	0	0	1	1
TCONS_00043059	0	0	1	1
TCONS_00043092	1	0	1	0
TCONS_00043093	1	1	1	1
TCONS_00043096	1	1	1	1
TCONS_00043097	1	1	0	0
TCONS_00043100	0	1	1	0
TCONS_00043119	1	1	1	1
TCONS_00043130	1	0	1	0
TCONS_00043131	1	1	1	1
TCONS_00043132	1	1	1	0
TCONS_00043152	0	1	0	1
TCONS_00043153	0	1	0	1
TCONS_00043158	0	0	1	1
TCONS_00043175	1	0	1	0
TCONS_00043219	1	1	1	1
TCONS_00043220	1	1	1	1
TCONS_00043223	1	0	1	1
TCONS_00043224	1	1	0	1
TCONS_00043225	1	1	1	1
TCONS_00043226	1	1	1	1
TCONS_00043233	1	1	1	1
TCONS_00043235	1	1	1	1
TCONS_00043236	0	1	0	1
TCONS_00043244	1	1	0	0
TCONS_00043259	1	1	0	1
TCONS_00043260	0	1	0	1
TCONS_00043262	1	1	1	1
TCONS_00043271	1	1	1	1
TCONS_00043272	1	0	1	0
TCONS_00043273	1	1	1	1
TCONS_00043276	1	0	1	0
TCONS_00043277	1	0	1	0
TCONS_00043296	1	0	0	1
TCONS_00043297	1	0	1	1
TCONS_00043298	1	0	1	0
TCONS_00043299	1	1	1	1
TCONS_00043300	1	0	1	1
TCONS_00043304	1	1	0	0
TCONS_00043310	0	1	1	1
TCONS_00043330	1	0	1	0
TCONS_00043373	1	0	1	1
TCONS_00043376	1	1	1	1
TCONS_00043386	1	0	1	1
TCONS_00043427	0	1	1	0
TCONS_00043428	0	1	0	1
TCONS_00043429	0	1	0	1
TCONS_00043430	0	1	1	0
TCONS_00043433	0	1	1	0
TCONS_00043446	0	0	1	1
TCONS_00043470	1	1	1	1
TCONS_00043494	0	1	0	1
TCONS_00043505	0	0	1	1
TCONS_00043523	0	1	0	1
TCONS_00043525	0	1	0	1
TCONS_00043527	1	1	1	1
TCONS_00043528	1	0	1	0
TCONS_00043548	1	0	1	0
TCONS_00043549	1	0	1	0
TCONS_00043551	1	1	1	1
TCONS_00043552	1	1	1	1
TCONS_00043554	1	1	1	1
TCONS_00043557	0	1	1	0
TCONS_00043571	1	1	0	1
TCONS_00043583	1	1	0	0
TCONS_00043589	1	1	1	0
TCONS_00043590	1	0	0	1
TCONS_00043636	1	0	1	0
TCONS_00043646	1	0	1	0
TCONS_00043653	0	1	1	1
TCONS_00043655	1	0	1	0
TCONS_00043659	1	0	1	0
TCONS_00043661	1	1	1	1
TCONS_00043667	1	1	0	1
TCONS_00043672	1	1	0	0
TCONS_00043701	1	1	1	1
TCONS_00043704	1	0	0	1
TCONS_00043706	0	1	0	1
TCONS_00043719	1	0	0	1
TCONS_00043721	1	1	0	1
TCONS_00043728	0	1	1	1
TCONS_00043764	1	1	1	1
TCONS_00043765	1	0	0	1
TCONS_00043766	1	1	0	1
TCONS_00043771	1	1	0	0
TCONS_00043772	1	1	0	0
TCONS_00043773	1	0	1	1
TCONS_00043774	1	1	0	0
TCONS_00043790	1	1	0	0
TCONS_00043799	1	0	0	1
TCONS_00043809	1	1	1	1
TCONS_00043827	0	1	0	1
TCONS_00043828	0	1	0	1
TCONS_00043831	0	1	1	1
TCONS_00043832	0	1	1	0
TCONS_00043833	0	1	1	0
TCONS_00043837	0	1	0	1
TCONS_00043855	0	0	1	1
TCONS_00043918	1	0	1	1
TCONS_00043927	1	1	1	1
TCONS_00043933	0	0	1	1
TCONS_00043940	1	0	1	1
TCONS_00043941	1	0	1	0
TCONS_00043950	1	1	1	1
TCONS_00043968	1	0	1	0
TCONS_00043969	1	0	1	0
TCONS_00043981	1	0	0	1
TCONS_00043984	1	0	1	0
TCONS_00043985	1	1	0	0
TCONS_00043987	1	1	1	1
TCONS_00043989	0	1	0	1
TCONS_00043992	1	0	1	0
TCONS_00044025	0	1	0	1
TCONS_00044062	1	1	0	1
TCONS_00044072	1	0	1	0
TCONS_00044075	1	1	1	1
TCONS_00044076	0	1	1	0
TCONS_00044077	0	1	0	1
TCONS_00044078	0	1	0	1
TCONS_00044110	1	0	0	1
TCONS_00044129	1	0	0	1
TCONS_00044135	1	1	0	0
TCONS_00044137	1	1	1	1
TCONS_00044138	1	0	0	1
TCONS_00044142	1	1	0	0
TCONS_00044147	1	1	1	0
TCONS_00044148	1	1	0	0
TCONS_00044149	1	1	0	0
TCONS_00044150	1	1	1	0
TCONS_00044151	1	1	0	1
TCONS_00044158	0	1	1	0
TCONS_00044195	1	1	0	0
TCONS_00044213	1	1	1	1
TCONS_00044214	1	1	0	1
TCONS_00044216	1	0	0	1
TCONS_00044217	1	1	1	1
TCONS_00044220	1	1	1	1
TCONS_00044224	0	0	1	1
TCONS_00044226	0	1	1	0
TCONS_00044229	1	1	1	1
TCONS_00044230	0	1	0	1
TCONS_00044233	1	1	1	1
TCONS_00044236	1	1	1	1
TCONS_00044240	1	1	1	0
TCONS_00044245	1	0	0	1
TCONS_00044252	1	0	0	1
TCONS_00044254	1	1	1	1
TCONS_00044257	1	1	0	1
TCONS_00044258	1	0	1	1
TCONS_00044259	1	0	0	1
TCONS_00044262	1	1	1	1
TCONS_00044278	0	0	1	1
TCONS_00044283	0	0	1	1
TCONS_00044294	1	0	1	0
TCONS_00044303	1	0	1	1
TCONS_00044310	1	1	0	1
TCONS_00044311	1	0	1	1
TCONS_00044312	1	1	1	1
TCONS_00044313	1	1	1	1
TCONS_00044342	0	1	0	1
TCONS_00044345	0	1	0	1
TCONS_00044346	0	1	1	0
TCONS_00044352	1	1	1	1
TCONS_00044353	1	1	0	1
TCONS_00044356	1	1	1	1
TCONS_00044359	1	1	1	0
TCONS_00044361	0	1	1	0
TCONS_00044373	1	1	0	1
TCONS_00044383	1	0	0	1
TCONS_00044395	0	0	1	1
TCONS_00044403	1	1	1	1
TCONS_00044404	1	1	0	0
TCONS_00044408	1	0	1	1
TCONS_00044417	0	1	0	1
TCONS_00044421	0	0	1	1
TCONS_00044423	0	0	1	1
TCONS_00044440	1	0	1	0
TCONS_00044444	1	1	1	1
TCONS_00044445	0	1	0	1
TCONS_00044460	1	1	1	1
TCONS_00044462	1	0	1	0
TCONS_00044464	1	0	1	0
TCONS_00044469	1	1	1	1
TCONS_00044471	1	1	0	0
TCONS_00044474	1	0	1	0
TCONS_00044478	1	1	1	1
TCONS_00044481	1	0	1	1
TCONS_00044487	1	1	0	0
TCONS_00044503	1	0	1	0
TCONS_00044510	1	0	0	1
TCONS_00044512	0	1	0	1
TCONS_00044531	1	0	1	0
TCONS_00044574	1	1	1	1
TCONS_00044578	1	0	1	1
TCONS_00044588	1	1	1	1
TCONS_00044592	0	1	0	1
TCONS_00044594	0	1	0	1
TCONS_00044617	1	0	1	0
TCONS_00044618	1	0	1	0
TCONS_00044619	1	0	1	0
TCONS_00044624	1	0	1	0
TCONS_00044639	1	0	1	0
TCONS_00044640	1	0	1	0
TCONS_00044641	1	0	1	0
TCONS_00044643	1	1	1	1
TCONS_00044649	1	1	0	1
TCONS_00044667	1	1	0	1
TCONS_00044716	1	0	1	1
TCONS_00044727	1	1	1	1
TCONS_00044732	1	1	0	1
TCONS_00044733	1	1	1	1
TCONS_00044807	1	0	1	0
TCONS_00044820	0	0	1	1
TCONS_00044831	1	1	1	1
TCONS_00044839	1	1	0	1
TCONS_00044845	1	1	0	1
TCONS_00044847	1	0	1	0
TCONS_00044851	1	1	1	1
TCONS_00044856	1	0	1	0
TCONS_00044860	1	1	1	1
TCONS_00044862	1	1	0	1
TCONS_00044864	1	1	1	1
TCONS_00044869	1	1	0	0
TCONS_00044935	1	0	1	0
TCONS_00044949	1	0	0	1
TCONS_00044950	1	0	0	1
TCONS_00044951	1	0	0	1
TCONS_00044952	1	0	0	1
TCONS_00044953	1	0	0	1
TCONS_00044958	1	0	0	1
TCONS_00044959	1	0	0	1
TCONS_00044960	1	0	0	1
TCONS_00044968	0	1	1	0
TCONS_00044969	0	1	1	0
TCONS_00044972	0	1	1	0
TCONS_00044974	0	1	1	1
TCONS_00044988	1	0	1	0
TCONS_00044989	1	0	0	1
TCONS_00045016	1	1	1	1
TCONS_00045020	1	0	0	1
TCONS_00045044	1	0	1	0
TCONS_00045045	1	1	1	1
TCONS_00045047	1	0	1	0
TCONS_00045055	1	0	1	0
TCONS_00045069	1	1	1	1
TCONS_00045075	1	1	1	1
TCONS_00045083	1	0	1	0
TCONS_00045084	1	0	1	0
TCONS_00045088	1	0	1	0
TCONS_00045089	1	0	1	0
TCONS_00045094	1	1	0	1
TCONS_00045098	1	0	0	1
TCONS_00045122	1	0	1	0
TCONS_00045123	1	0	1	0
TCONS_00045125	1	0	1	0
TCONS_00045127	0	1	0	1
TCONS_00045134	1	0	0	1
TCONS_00045136	1	0	1	0
TCONS_00045164	1	0	1	0
TCONS_00045178	0	1	1	1
TCONS_00045197	0	1	0	1
TCONS_00045203	0	0	1	1
TCONS_00045205	0	0	1	1
TCONS_00045243	1	0	1	0
TCONS_00045246	1	1	1	1
TCONS_00045259	1	0	0	1
TCONS_00045261	1	0	1	1
TCONS_00045262	1	0	1	1
TCONS_00045265	0	1	0	1
TCONS_00045293	1	1	1	1
TCONS_00045294	0	1	0	1
TCONS_00045297	1	0	1	0
TCONS_00045298	1	0	1	0
TCONS_00045312	1	0	0	1
TCONS_00045316	0	1	0	1
TCONS_00045319	0	1	1	1
TCONS_00045333	1	0	1	1
TCONS_00045334	1	0	1	1
TCONS_00045335	1	0	1	0
TCONS_00045355	0	0	1	1
TCONS_00045362	1	1	1	0
TCONS_00045365	0	1	0	1
TCONS_00045372	1	0	1	0
TCONS_00045373	1	0	1	0
TCONS_00045385	1	1	1	1
TCONS_00045402	1	0	1	0
TCONS_00045405	1	0	1	0
TCONS_00045408	1	1	1	1
TCONS_00045410	0	1	1	1
TCONS_00045412	1	1	1	1
TCONS_00045414	1	1	1	1
TCONS_00045417	0	1	0	1
TCONS_00045426	1	1	1	1
TCONS_00045427	1	1	0	1
TCONS_00045428	1	0	0	1
TCONS_00045429	0	1	0	1
TCONS_00045437	1	0	1	0
TCONS_00045443	1	1	0	0
TCONS_00045452	0	1	1	1
TCONS_00045461	1	1	0	0
TCONS_00045464	0	0	1	1
TCONS_00045470	0	1	0	1
TCONS_00045479	1	0	0	1
TCONS_00045481	1	1	1	1
TCONS_00045487	0	1	1	1
TCONS_00045488	0	1	0	1
TCONS_00045489	0	1	0	1
TCONS_00045491	1	1	0	1
TCONS_00045496	1	1	1	1
TCONS_00045497	1	1	0	1
TCONS_00045519	1	0	1	1
TCONS_00045520	1	0	0	1
TCONS_00045521	1	1	1	0
TCONS_00045522	1	0	1	0
TCONS_00045528	0	0	1	1
TCONS_00045537	0	0	1	1
TCONS_00045538	0	0	1	1
TCONS_00045557	1	1	1	1
TCONS_00045569	1	0	1	0
TCONS_00045570	1	1	1	1
TCONS_00045572	1	1	1	1
TCONS_00045577	1	0	1	0
TCONS_00045578	1	0	1	0
TCONS_00045589	0	1	0	1
TCONS_00045598	0	0	1	1
TCONS_00045621	1	0	1	1
TCONS_00045624	1	0	1	0
TCONS_00045625	1	0	1	0
TCONS_00045627	1	1	1	1
TCONS_00045635	1	1	1	1
TCONS_00045640	1	1	1	1
TCONS_00045641	1	1	1	1
TCONS_00045652	1	0	1	0
TCONS_00045671	1	0	0	1
TCONS_00045674	1	1	1	1
TCONS_00045686	1	0	0	1
TCONS_00045699	1	0	1	0
TCONS_00045700	0	1	1	0
TCONS_00045702	1	1	0	1
TCONS_00045704	1	0	1	0
TCONS_00045705	1	1	1	1
TCONS_00045708	1	1	1	1
TCONS_00045714	1	1	1	1
TCONS_00045717	1	1	1	1
TCONS_00045724	1	0	0	1
TCONS_00045725	0	1	0	1
TCONS_00045742	0	0	1	1
TCONS_00045749	1	1	1	1
TCONS_00045756	1	1	1	1
TCONS_00045773	1	0	1	0
TCONS_00045774	1	0	1	0
TCONS_00045775	1	0	1	0
TCONS_00045784	1	1	1	1
TCONS_00045791	1	1	1	1
TCONS_00045803	1	0	1	1
TCONS_00045804	0	1	1	0
TCONS_00045805	1	1	0	1
TCONS_00045808	0	0	1	1
TCONS_00045816	0	0	1	1
TCONS_00045820	1	0	1	1
TCONS_00045821	1	1	1	1
TCONS_00045824	0	1	0	1
TCONS_00045826	1	1	1	0
TCONS_00045835	0	0	1	1
TCONS_00045836	1	1	1	1
TCONS_00045838	0	1	1	0
TCONS_00045842	1	0	1	0
TCONS_00045854	1	0	1	0
TCONS_00045858	1	0	1	0
TCONS_00045859	1	1	1	1
TCONS_00045878	1	1	1	1
TCONS_00045879	1	1	0	0
TCONS_00045885	0	0	1	1
TCONS_00045895	1	1	1	1
TCONS_00045896	1	1	1	1
TCONS_00045952	1	0	1	0
TCONS_00045955	1	0	0	1
TCONS_00045956	1	1	1	0
TCONS_00045957	0	1	1	0
TCONS_00045961	1	1	0	1
TCONS_00045962	1	1	0	1
TCONS_00045983	1	1	1	1
TCONS_00045996	1	1	0	0
TCONS_00046005	1	0	1	0
TCONS_00046007	1	0	1	0
TCONS_00046016	1	0	1	0
TCONS_00046018	1	1	1	1
TCONS_00046019	1	0	1	1
TCONS_00046057	1	1	0	0
TCONS_00046060	1	1	0	0
TCONS_00046061	1	0	1	1
TCONS_00046064	1	1	0	0
TCONS_00046071	0	1	0	1
TCONS_00046077	0	0	1	1
TCONS_00046088	1	0	1	0
TCONS_00046095	1	0	1	0
TCONS_00046097	0	1	1	1
TCONS_00046100	1	1	1	1
TCONS_00046101	1	0	1	0
TCONS_00046111	1	1	1	1
TCONS_00046112	1	1	1	1
TCONS_00046114	0	1	0	1
TCONS_00046116	0	0	1	1
TCONS_00046118	0	1	1	0
TCONS_00046127	1	0	1	0
TCONS_00046140	1	1	0	1
TCONS_00046146	1	0	1	0
TCONS_00046147	1	0	1	0
TCONS_00046149	1	0	1	1
TCONS_00046151	1	0	1	1
TCONS_00046165	1	0	1	0
TCONS_00046172	1	1	0	1
TCONS_00046173	1	1	0	0
TCONS_00046174	1	0	0	1
TCONS_00046175	1	1	0	1
TCONS_00046176	1	1	0	1
TCONS_00046178	1	1	1	1
TCONS_00046179	1	0	1	0
TCONS_00046183	1	1	1	1
TCONS_00046184	1	1	0	0
TCONS_00046185	1	0	1	0
TCONS_00046187	1	0	1	0
TCONS_00046188	1	0	1	0
TCONS_00046190	1	1	0	0
TCONS_00046191	1	1	1	1
TCONS_00046198	1	0	1	1
TCONS_00046200	1	0	0	1
TCONS_00046209	1	1	1	1
TCONS_00046222	1	0	1	0
TCONS_00046223	1	0	1	0
TCONS_00046233	1	1	1	1
TCONS_00046234	1	0	1	0
TCONS_00046237	1	0	1	0
TCONS_00046239	1	0	1	0
TCONS_00046241	1	0	1	0
TCONS_00046245	1	0	1	0
TCONS_00046258	1	1	0	0
TCONS_00046263	1	0	0	1
TCONS_00046264	1	0	1	1
TCONS_00046265	1	0	1	1
TCONS_00046285	1	0	1	0
TCONS_00046289	1	0	1	0
TCONS_00046294	1	1	1	1
TCONS_00046297	1	0	1	1
TCONS_00046298	1	0	1	0
TCONS_00046307	1	1	1	0
TCONS_00046308	1	1	1	0
TCONS_00046309	1	1	0	1
TCONS_00046318	1	0	0	1
TCONS_00046332	1	1	1	0
TCONS_00046344	1	1	1	1
TCONS_00046345	1	1	1	1
TCONS_00046346	1	0	1	0
TCONS_00046376	1	0	1	0
TCONS_00046377	1	0	1	0
TCONS_00046379	1	0	1	0
TCONS_00046380	1	0	1	0
TCONS_00046381	1	0	1	0
TCONS_00046385	1	0	1	0
TCONS_00046389	1	1	1	1
TCONS_00046390	1	1	0	0
TCONS_00046398	1	0	1	0
TCONS_00046402	1	1	1	1
TCONS_00046429	1	1	1	1
TCONS_00046431	1	0	1	0
TCONS_00046434	1	1	1	1
TCONS_00046435	1	1	1	1
TCONS_00046449	1	0	1	0
TCONS_00046466	1	0	1	0
TCONS_00046483	1	0	1	0
TCONS_00046488	1	1	1	0
TCONS_00046492	1	1	1	1
TCONS_00046494	1	1	1	1
TCONS_00046498	1	0	1	0
TCONS_00046499	1	0	1	1
TCONS_00046507	1	0	0	1
TCONS_00046510	1	0	1	0
TCONS_00046517	1	1	1	1
TCONS_00046519	1	1	1	0
TCONS_00046520	1	0	1	0
TCONS_00046524	1	0	0	1
TCONS_00046531	1	0	1	0
TCONS_00046538	1	0	1	1
TCONS_00046539	1	1	0	0
TCONS_00046543	1	0	1	1
TCONS_00046544	1	0	1	0
TCONS_00046545	1	0	1	1
TCONS_00046548	1	1	0	0
TCONS_00046549	1	1	1	0
TCONS_00046574	1	0	1	0
TCONS_00046575	1	0	1	0
TCONS_00046579	1	0	1	0
TCONS_00046580	1	0	1	0
TCONS_00046585	1	1	0	1
TCONS_00046586	1	1	1	1
TCONS_00046588	1	0	1	0
TCONS_00046594	1	1	1	1
TCONS_00046601	1	1	0	1
TCONS_00046602	1	1	1	1
TCONS_00046611	1	1	1	0
TCONS_00046612	1	1	1	1
TCONS_00046613	1	1	0	1
TCONS_00046616	1	1	1	1
TCONS_00046628	1	1	1	1
TCONS_00046642	1	1	1	0
TCONS_00046645	1	1	1	1
TCONS_00046647	1	0	0	1
TCONS_00046650	1	0	1	1
TCONS_00046670	1	0	1	1
TCONS_00046671	1	0	0	1
TCONS_00046672	1	0	0	1
TCONS_00046678	1	1	0	1
TCONS_00046680	1	1	1	1
TCONS_00046690	1	1	1	1
TCONS_00046693	1	0	1	0
TCONS_00046706	1	1	1	1
TCONS_00046712	1	1	1	1
TCONS_00046714	1	0	1	0
TCONS_00046716	1	0	1	0
TCONS_00046719	1	0	1	0
TCONS_00046722	1	0	1	0
TCONS_00046723	1	1	1	1
TCONS_00046724	1	0	1	0
TCONS_00046739	1	0	1	0
TCONS_00046744	1	1	0	0
TCONS_00046756	1	1	1	1
TCONS_00046761	1	0	1	1
TCONS_00046762	1	0	1	0
TCONS_00046764	1	1	0	1
TCONS_00046767	1	1	0	1
TCONS_00046772	1	1	0	0
TCONS_00046780	1	1	1	0
TCONS_00046793	1	1	0	0
TCONS_00046797	1	0	1	0
TCONS_00046802	1	1	1	0
TCONS_00046804	1	1	1	1
TCONS_00046805	1	0	1	0
TCONS_00046839	1	1	1	1
TCONS_00046850	1	0	1	0
TCONS_00046851	1	1	1	0
TCONS_00046862	1	0	1	0
TCONS_00046863	1	0	1	0
TCONS_00046883	1	0	1	1
TCONS_00046884	1	1	1	1
TCONS_00046887	1	0	1	1
TCONS_00046888	1	0	0	1
TCONS_00046897	1	1	0	1
TCONS_00046901	1	1	1	1
TCONS_00046902	1	1	0	1
TCONS_00046903	1	0	0	1
TCONS_00046904	1	1	0	0
TCONS_00046914	1	1	0	1
TCONS_00046919	1	1	0	0
TCONS_00046922	1	1	1	1
TCONS_00046923	1	0	0	1
TCONS_00046926	1	0	1	0
TCONS_00046927	1	0	1	0
TCONS_00046928	1	0	1	0
TCONS_00046933	1	0	1	1
TCONS_00046941	1	1	1	1
TCONS_00046948	1	1	0	1
TCONS_00046952	1	1	1	1
TCONS_00046954	1	1	1	1
TCONS_00046955	1	0	1	1
TCONS_00046964	1	0	0	1
TCONS_00046971	1	0	0	1
TCONS_00046993	1	1	0	0
TCONS_00046994	1	1	0	0
TCONS_00046995	1	1	0	0
TCONS_00046998	1	1	0	0
TCONS_00047001	1	1	1	0
TCONS_00047009	1	0	0	1
TCONS_00047012	1	1	0	1
TCONS_00047015	1	1	0	1
TCONS_00047018	1	1	1	1
TCONS_00047025	1	0	1	0
TCONS_00047026	1	0	0	1
TCONS_00047029	1	1	0	1
TCONS_00047032	1	1	1	0
TCONS_00047037	1	0	1	0
TCONS_00047040	1	0	1	0
TCONS_00047041	1	0	0	1
TCONS_00047045	1	1	1	1
TCONS_00047046	1	1	1	1
TCONS_00047053	1	0	1	0
TCONS_00047054	1	0	1	0
TCONS_00047059	1	0	0	1
TCONS_00047068	1	1	1	1
TCONS_00047076	1	0	1	1
TCONS_00047082	1	0	0	1
TCONS_00047089	1	1	0	0
TCONS_00047106	1	0	1	0
TCONS_00047114	1	1	0	1
TCONS_00047115	1	1	1	1
TCONS_00047117	1	1	1	1
TCONS_00047121	1	0	0	1
TCONS_00047123	1	1	0	0
TCONS_00047141	1	0	1	1
TCONS_00047142	1	1	0	0
TCONS_00047143	1	1	0	0
TCONS_00047144	1	1	1	1
TCONS_00047150	1	1	1	0
TCONS_00047152	1	1	1	1
TCONS_00047154	1	0	1	0
TCONS_00047155	1	0	1	0
TCONS_00047161	1	0	1	0
TCONS_00047163	1	0	0	1
TCONS_00047165	1	0	1	0
TCONS_00047172	1	0	1	0
TCONS_00047183	1	1	1	0
TCONS_00047184	1	1	1	0
TCONS_00047193	1	1	0	1
TCONS_00047194	1	1	0	1
TCONS_00047207	1	1	1	0
TCONS_00047216	1	1	1	1
TCONS_00047227	1	0	1	0
TCONS_00047233	1	0	1	0
TCONS_00047234	1	0	1	0
TCONS_00047237	1	0	1	0
TCONS_00047239	1	0	1	0
TCONS_00047240	1	1	1	1
TCONS_00047243	1	1	0	0
TCONS_00047266	1	1	1	1
TCONS_00047267	1	1	1	1
TCONS_00047272	1	1	1	1
TCONS_00047274	1	0	1	0
TCONS_00047275	1	0	1	0
TCONS_00047288	1	0	1	1
TCONS_00047290	1	1	1	1
TCONS_00047294	1	1	1	1
TCONS_00047295	1	0	1	1
TCONS_00047299	1	0	1	0
TCONS_00047300	1	0	1	0
TCONS_00047301	1	0	0	1
TCONS_00047303	1	1	1	1
TCONS_00047304	1	0	1	1
TCONS_00047314	1	1	1	1
TCONS_00047338	1	1	1	1
TCONS_00047339	1	1	0	0
TCONS_00047340	1	0	1	0
TCONS_00047358	1	1	0	0
TCONS_00047360	1	0	0	1
TCONS_00047362	1	1	1	1
TCONS_00047363	1	0	1	1
TCONS_00047371	1	1	1	1
TCONS_00047374	1	1	0	1
TCONS_00047375	1	0	1	1
TCONS_00047376	1	1	1	1
TCONS_00047381	1	1	1	1
TCONS_00047383	1	0	1	0
TCONS_00047398	1	0	1	0
TCONS_00047410	1	1	1	0
TCONS_00047411	1	1	1	0
TCONS_00047423	1	1	1	1
TCONS_00047429	1	1	0	0
TCONS_00047434	1	0	1	0
TCONS_00047435	1	0	1	0
TCONS_00047436	1	0	1	0
TCONS_00047443	1	1	1	1
TCONS_00047472	1	1	0	0
TCONS_00047474	1	1	0	0
TCONS_00047480	1	0	1	0
TCONS_00047485	1	1	0	1
TCONS_00047490	1	1	1	1
TCONS_00047498	1	1	0	1
TCONS_00047501	1	1	0	0
TCONS_00047502	1	1	0	0
TCONS_00047508	1	0	1	0
TCONS_00047509	1	0	1	0
TCONS_00047511	1	0	1	0
TCONS_00047524	1	1	1	1
TCONS_00047532	1	0	1	0
TCONS_00047551	1	1	1	1
TCONS_00047554	1	0	1	1
TCONS_00047555	1	0	1	0
TCONS_00047557	1	1	0	1
TCONS_00047558	1	1	1	0
TCONS_00047603	1	0	1	0
TCONS_00047604	1	0	1	0
TCONS_00047606	1	0	1	0
TCONS_00047607	1	1	1	1
TCONS_00047639	1	1	1	1
TCONS_00047644	1	1	0	0
TCONS_00047646	1	1	1	1
TCONS_00047676	1	0	0	1
TCONS_00047678	1	0	0	1
TCONS_00047679	1	0	0	1
TCONS_00047796	1	1	1	1
TCONS_00047799	1	1	0	0
TCONS_00047805	1	0	1	0
TCONS_00047811	1	0	1	0
TCONS_00047825	0	1	0	1
TCONS_00047826	0	1	0	1
TCONS_00047854	0	1	0	1
TCONS_00047866	0	1	0	1
TCONS_00047875	0	1	1	0
TCONS_00047892	0	1	0	1
TCONS_00047897	0	1	0	1
TCONS_00047899	0	1	1	0
TCONS_00047907	0	1	0	1
TCONS_00047910	0	1	0	1
TCONS_00047918	0	1	1	1
TCONS_00047931	0	1	1	1
TCONS_00047933	0	1	1	0
TCONS_00047934	0	1	1	0
TCONS_00047939	0	1	0	1
TCONS_00047944	0	1	0	1
TCONS_00047948	0	1	1	0
TCONS_00047949	0	1	1	0
TCONS_00047954	0	1	1	0
TCONS_00047978	0	1	1	0
TCONS_00047996	0	1	0	1
TCONS_00048002	0	1	1	0
TCONS_00048005	0	1	0	1
TCONS_00048023	0	1	1	1
TCONS_00048037	0	1	1	1
TCONS_00048041	0	1	1	1
TCONS_00048042	0	1	1	1
TCONS_00048045	0	1	1	1
TCONS_00048047	0	1	1	0
TCONS_00048054	0	1	0	1
TCONS_00048063	0	1	0	1
TCONS_00048084	0	1	1	1
TCONS_00048090	0	1	0	1
TCONS_00048118	0	1	0	1
TCONS_00048127	0	1	0	1
TCONS_00048184	0	1	0	1
TCONS_00048185	0	1	0	1
TCONS_00048198	0	1	1	1
TCONS_00048203	0	1	1	1
TCONS_00048218	0	1	1	0
TCONS_00048225	0	1	0	1
TCONS_00048236	0	1	1	1
TCONS_00048245	0	1	0	1
TCONS_00048255	0	1	0	1
TCONS_00048273	0	1	1	1
TCONS_00048299	0	1	1	1
TCONS_00048311	0	1	0	1
TCONS_00048312	0	1	1	1
TCONS_00048314	0	1	1	0
TCONS_00048326	0	1	0	1
TCONS_00048339	0	1	1	0
TCONS_00048347	0	1	1	1
TCONS_00048370	0	1	0	1
TCONS_00048371	0	1	0	1
TCONS_00048374	0	1	0	1
TCONS_00048376	0	1	1	1
TCONS_00048378	0	1	0	1
TCONS_00048397	0	1	1	1
TCONS_00048403	0	1	0	1
TCONS_00048409	0	1	0	1
TCONS_00048410	0	1	0	1
TCONS_00048413	0	1	0	1
TCONS_00048414	0	1	0	1
TCONS_00048426	0	1	1	1
TCONS_00048430	0	1	1	0
TCONS_00048464	0	1	1	0
TCONS_00048465	0	1	0	1
TCONS_00048466	0	1	1	1
TCONS_00048469	0	1	1	0
TCONS_00048477	0	1	0	1
TCONS_00048478	0	1	0	1
TCONS_00048489	0	1	1	0
TCONS_00048495	0	1	0	1
TCONS_00048499	0	1	0	1
TCONS_00048502	0	1	1	1
TCONS_00048505	0	1	0	1
TCONS_00048509	0	1	1	0
TCONS_00048524	0	1	0	1
TCONS_00048525	0	1	0	1
TCONS_00048529	0	1	0	1
TCONS_00048530	0	1	0	1
TCONS_00048540	0	1	0	1
TCONS_00048552	0	1	0	1
TCONS_00048561	0	1	0	1
TCONS_00048569	0	1	1	0
TCONS_00048572	0	1	1	1
TCONS_00048580	0	1	1	0
TCONS_00048581	0	1	1	1
TCONS_00048586	0	1	0	1
TCONS_00048588	0	1	0	1
TCONS_00048589	0	1	0	1
TCONS_00048590	0	1	0	1
TCONS_00048610	0	1	1	1
TCONS_00048616	0	1	0	1
TCONS_00048621	0	1	1	1
TCONS_00048623	0	1	0	1
TCONS_00048624	0	1	1	1
TCONS_00048630	0	1	1	0
TCONS_00048638	0	1	1	1
TCONS_00048650	0	1	1	1
TCONS_00048657	0	1	1	0
TCONS_00048666	0	1	1	1
TCONS_00048667	0	1	1	0
TCONS_00048670	0	1	0	1
TCONS_00048671	0	1	0	1
TCONS_00048673	0	1	1	0
TCONS_00048685	0	1	0	1
TCONS_00048689	0	1	1	1
TCONS_00048749	0	1	0	1
TCONS_00048825	0	0	1	1
TCONS_00048828	0	0	1	1
TCONS_00048841	0	0	1	1
TCONS_00048850	0	0	1	1
TCONS_00048855	0	0	1	1
TCONS_00048891	0	0	1	1
TCONS_00048893	0	0	1	1
TCONS_00048942	0	0	1	1
TCONS_00048946	0	0	1	1
TCONS_00048968	0	0	1	1
TCONS_00048969	0	0	1	1
TCONS_00048971	0	0	1	1
TCONS_00049019	0	0	1	1
TCONS_00049029	0	0	1	1
TCONS_00049042	0	0	1	1
TCONS_00049043	0	0	1	1
TCONS_00049044	0	0	1	1
TCONS_00049052	0	0	1	1
TCONS_00049116	0	0	1	1
TCONS_00049229	0	0	1	1
TCONS_00049286	0	0	1	1
TCONS_00049296	0	0	1	1
TCONS_00049345	0	0	1	1
TCONS_00049381	0	0	1	1
TCONS_00049423	0	0	1	1
TCONS_00049425	0	0	1	1
TCONS_00049496	0	0	1	1
TCONS_00049551	0	0	1	1
TCONS_00049554	0	0	1	1
TCONS_00049562	0	0	1	1
TCONS_00049566	0	0	1	1
TCONS_00049584	0	0	1	1
TCONS_00049592	0	0	1	1
TCONS_00050488	1	0	1	0
TCONS_00050493	1	0	0	1
TCONS_00050503	1	0	1	0
TCONS_00050523	1	0	1	0
TCONS_00050531	1	1	1	1
TCONS_00050532	1	0	1	1
TCONS_00050534	1	0	0	1
TCONS_00050572	1	1	1	1
TCONS_00050581	1	1	1	1
TCONS_00050582	1	1	1	1
TCONS_00050583	1	0	1	0
TCONS_00050587	1	1	0	0
TCONS_00050588	1	1	1	1
TCONS_00050590	1	1	1	1
TCONS_00050604	1	0	1	0
TCONS_00050605	1	1	0	1
TCONS_00050608	1	0	1	1
TCONS_00050612	1	0	1	1
TCONS_00050618	1	1	1	1
TCONS_00050619	1	1	1	1
TCONS_00050620	1	1	1	1
TCONS_00050622	1	0	0	1
TCONS_00050646	1	1	0	1
TCONS_00050655	1	0	1	0
TCONS_00050671	1	0	1	0
TCONS_00050676	1	0	1	0
TCONS_00050685	1	0	1	1
TCONS_00050698	1	0	1	1
TCONS_00050710	1	0	1	0
TCONS_00050714	1	0	1	0
TCONS_00050729	1	1	0	0
TCONS_00050732	1	1	0	0
TCONS_00050734	1	1	0	1
TCONS_00050735	1	1	1	1
TCONS_00050739	1	0	1	0
TCONS_00050750	1	0	0	1
TCONS_00050751	1	1	0	1
TCONS_00050753	1	1	1	1
TCONS_00050778	1	0	1	0
TCONS_00050782	1	0	1	0
TCONS_00050784	1	1	1	1
TCONS_00050801	1	0	0	1
TCONS_00050805	1	1	1	0
TCONS_00050807	1	1	1	0
TCONS_00050808	1	1	1	0
TCONS_00050870	1	0	0	1
TCONS_00050871	1	1	0	0
TCONS_00050872	1	1	1	1
TCONS_00050873	1	1	1	1
TCONS_00050874	1	0	1	1
TCONS_00050876	1	1	0	1
TCONS_00050877	1	1	1	1
TCONS_00050878	1	1	1	1
TCONS_00050881	1	1	1	1
TCONS_00050889	1	1	1	0
TCONS_00050890	1	1	1	1
TCONS_00050894	1	0	1	0
TCONS_00050906	1	0	1	0
TCONS_00050911	1	0	1	1
TCONS_00050919	1	1	1	1
TCONS_00050920	1	1	1	1
TCONS_00050938	1	1	1	1
TCONS_00050944	1	1	1	1
TCONS_00050952	1	0	1	0
TCONS_00050981	1	1	0	0
TCONS_00050993	1	0	0	1
TCONS_00051002	1	1	1	1
TCONS_00051006	1	0	1	0
TCONS_00051010	1	0	1	1
TCONS_00051016	1	0	1	0
TCONS_00051018	1	0	1	0
TCONS_00051040	1	0	1	0
TCONS_00051041	1	0	0	1
TCONS_00051046	1	1	1	1
TCONS_00051063	1	1	0	1
TCONS_00051064	1	0	1	0
TCONS_00051065	1	1	1	0
TCONS_00051073	1	1	1	1
TCONS_00051084	1	1	0	0
TCONS_00051092	1	1	0	1
TCONS_00051094	1	0	1	0
TCONS_00051096	1	0	1	0
TCONS_00051102	1	0	1	0
TCONS_00051108	1	1	1	0
TCONS_00051114	1	0	1	0
TCONS_00051124	1	1	1	1
TCONS_00051125	1	1	0	1
TCONS_00051126	1	1	0	0
TCONS_00051128	1	1	0	0
TCONS_00051130	1	1	0	0
TCONS_00051137	1	0	0	1
TCONS_00051138	1	0	0	1
TCONS_00051139	1	1	1	0
TCONS_00051141	1	0	0	1
TCONS_00051186	1	0	1	1
TCONS_00051198	1	0	1	0
TCONS_00051200	1	0	1	0
TCONS_00051201	1	1	0	0
TCONS_00051209	1	1	0	1
TCONS_00051211	1	0	1	0
TCONS_00051215	1	1	0	0
TCONS_00051221	1	1	1	0
TCONS_00051228	1	0	1	0
TCONS_00051230	1	1	0	1
TCONS_00051231	1	1	0	1
TCONS_00051239	1	0	1	0
TCONS_00051240	1	0	1	0
TCONS_00051243	1	1	0	1
TCONS_00051262	1	0	1	0
TCONS_00051271	1	1	1	1
TCONS_00051274	1	1	0	0
TCONS_00051279	1	0	1	0
TCONS_00051283	1	0	1	1
TCONS_00051290	1	0	0	1
TCONS_00051298	1	1	1	1
TCONS_00051327	1	0	1	0
TCONS_00051330	1	0	1	0
TCONS_00051341	1	0	1	0
TCONS_00051347	1	0	1	1
TCONS_00051351	1	1	1	0
TCONS_00051352	1	0	0	1
TCONS_00051355	1	1	0	1
TCONS_00051362	1	1	1	1
TCONS_00051366	1	1	1	1
TCONS_00051367	1	1	1	1
TCONS_00051371	1	0	1	0
TCONS_00051380	1	1	1	0
TCONS_00051381	1	1	0	1
TCONS_00051385	1	0	1	0
TCONS_00051387	1	0	1	0
TCONS_00051388	1	0	0	1
TCONS_00051389	1	1	0	0
TCONS_00051390	1	1	0	0
TCONS_00051391	1	0	1	0
TCONS_00051393	1	1	1	1
TCONS_00051394	1	1	1	1
TCONS_00051410	1	1	1	1
TCONS_00051411	1	1	1	1
TCONS_00051412	1	1	0	1
TCONS_00051415	1	0	1	0
TCONS_00051435	1	1	1	1
TCONS_00051440	1	1	1	0
TCONS_00051441	1	0	1	0
TCONS_00051442	1	0	1	0
TCONS_00051458	1	0	1	1
TCONS_00051459	1	0	0	1
TCONS_00051468	1	0	1	0
TCONS_00051478	1	0	1	0
TCONS_00051483	1	0	1	0
TCONS_00051485	1	1	1	0
TCONS_00051501	1	0	1	0
TCONS_00051503	1	0	1	0
TCONS_00051528	1	0	1	0
TCONS_00051532	1	1	0	0
TCONS_00051535	1	1	1	0
TCONS_00051538	1	0	1	1
TCONS_00051545	1	0	1	0
TCONS_00051557	1	1	1	1
TCONS_00051558	1	0	1	0
TCONS_00051560	1	0	0	1
TCONS_00051571	1	0	0	1
TCONS_00051582	1	1	1	1
TCONS_00051585	1	1	1	0
TCONS_00051586	1	1	1	1
TCONS_00051618	1	1	1	1
TCONS_00051622	1	0	1	1
TCONS_00051628	1	1	0	0
TCONS_00051629	1	0	1	1
TCONS_00051631	1	1	1	1
TCONS_00051641	1	1	0	1
TCONS_00051647	1	0	0	1
TCONS_00051649	1	1	1	1
TCONS_00051651	1	0	0	1
TCONS_00051653	1	1	0	0
TCONS_00051655	1	0	1	1
TCONS_00051669	1	1	1	1
TCONS_00051672	1	1	1	1
TCONS_00051673	1	0	1	1
TCONS_00051674	1	1	1	1
TCONS_00051677	1	0	1	1
TCONS_00051687	1	1	0	1
TCONS_00051688	1	1	0	1
TCONS_00051689	1	1	1	1
TCONS_00051693	1	0	1	0
TCONS_00051697	1	1	1	1
TCONS_00051703	1	0	0	1
TCONS_00051704	1	0	0	1
TCONS_00051706	1	1	1	1
TCONS_00051708	1	0	1	0
TCONS_00051710	1	0	0	1
TCONS_00051721	1	1	0	1
TCONS_00051725	1	1	1	0
TCONS_00051727	1	0	0	1
TCONS_00051735	1	0	1	0
TCONS_00051739	1	1	0	0
TCONS_00051741	1	1	1	1
TCONS_00051745	1	1	1	1
TCONS_00051751	1	1	1	1
TCONS_00051762	1	0	1	0
TCONS_00051767	1	0	1	0
TCONS_00051779	1	1	1	0
TCONS_00051780	1	1	1	1
TCONS_00051789	1	0	0	1
TCONS_00051797	1	0	0	1
TCONS_00051799	1	0	1	0
TCONS_00051802	1	1	1	0
TCONS_00051803	1	1	0	0
TCONS_00051812	1	1	1	0
TCONS_00051813	1	1	1	0
TCONS_00051814	1	1	1	0
TCONS_00051816	1	1	1	0
TCONS_00051820	1	1	0	0
TCONS_00051834	1	0	1	0
TCONS_00051857	1	0	0	1
TCONS_00051867	1	1	0	1
TCONS_00051868	1	0	1	0
TCONS_00051873	1	1	0	1
TCONS_00051874	1	1	0	1
TCONS_00051877	1	1	0	0
TCONS_00051882	1	0	1	0
TCONS_00051888	1	0	1	1
TCONS_00051899	1	1	0	0
TCONS_00051901	1	0	1	0
TCONS_00051914	1	1	1	1
TCONS_00051918	1	0	1	0
TCONS_00051919	1	1	0	0
TCONS_00051925	1	1	0	0
TCONS_00051926	1	1	1	1
TCONS_00051927	1	1	1	0
TCONS_00051929	1	1	1	0
TCONS_00051931	1	1	0	1
TCONS_00051932	1	0	1	0
TCONS_00051933	1	0	1	0
TCONS_00051935	1	1	0	1
TCONS_00051936	1	1	0	0
TCONS_00051940	1	0	1	0
TCONS_00051955	1	1	1	1
TCONS_00051956	1	1	0	0
TCONS_00051957	1	1	0	0
TCONS_00051958	1	1	0	0
TCONS_00051966	1	1	0	1
TCONS_00051975	1	0	0	1
TCONS_00051979	1	0	1	0
TCONS_00051984	1	0	1	0
TCONS_00051996	1	1	0	0
TCONS_00051998	1	1	0	1
TCONS_00052002	1	1	1	1
TCONS_00052009	1	1	0	0
TCONS_00052021	1	0	1	0
TCONS_00052022	1	1	1	0
TCONS_00052023	1	1	1	1
TCONS_00052024	1	0	1	0
TCONS_00052027	1	1	0	0
TCONS_00052028	1	1	1	1
TCONS_00052031	1	1	0	1
TCONS_00052035	1	1	0	1
TCONS_00052037	1	1	1	1
TCONS_00052052	1	0	1	0
TCONS_00052094	1	0	1	0
TCONS_00052098	1	0	1	0
TCONS_00052100	1	1	0	0
TCONS_00052102	1	1	1	1
TCONS_00052103	1	1	1	1
TCONS_00052107	1	0	1	0
TCONS_00052108	1	0	0	1
TCONS_00052114	1	0	1	0
TCONS_00052116	1	1	0	1
TCONS_00052125	1	1	1	1
TCONS_00052131	1	1	1	1
TCONS_00052140	1	0	0	1
TCONS_00052144	1	1	1	0
TCONS_00052145	1	0	1	1
TCONS_00052147	1	1	1	1
TCONS_00052148	1	1	1	1
TCONS_00052153	1	1	1	1
TCONS_00052154	1	0	0	1
TCONS_00052155	1	1	1	1
TCONS_00052156	1	1	1	1
TCONS_00052160	1	0	0	1
TCONS_00052161	1	1	0	0
TCONS_00052162	1	1	0	1
TCONS_00052181	1	1	0	0
TCONS_00052183	1	0	1	0
TCONS_00052187	1	1	1	1
TCONS_00052188	1	1	0	1
TCONS_00052189	1	0	0	1
TCONS_00052191	1	0	0	1
TCONS_00052198	1	1	1	1
TCONS_00052199	1	0	0	1
TCONS_00052202	1	1	1	1
TCONS_00052210	1	1	1	1
TCONS_00052212	1	0	1	0
TCONS_00052213	1	0	0	1
TCONS_00052214	1	1	1	1
TCONS_00052225	1	1	0	1
TCONS_00052227	1	1	1	1
TCONS_00052232	1	0	0	1
TCONS_00052233	1	1	1	1
TCONS_00052234	1	1	0	1
TCONS_00052235	1	1	1	1
TCONS_00052237	1	1	0	1
TCONS_00052250	1	1	1	0
TCONS_00052262	1	1	0	0
TCONS_00052263	1	0	1	1
TCONS_00052265	1	1	1	1
TCONS_00052278	1	0	1	0
TCONS_00052280	1	1	0	0
TCONS_00052283	1	1	0	0
TCONS_00052297	1	1	1	1
TCONS_00052305	1	1	1	1
TCONS_00052306	1	1	1	0
TCONS_00052312	1	0	1	0
TCONS_00052318	1	1	0	1
TCONS_00052320	1	0	1	0
TCONS_00052322	1	0	1	1
TCONS_00052323	1	1	1	1
TCONS_00052324	1	1	1	1
TCONS_00052328	1	1	0	1
TCONS_00052329	1	0	1	0
TCONS_00052330	1	0	1	0
TCONS_00052334	1	1	1	0
TCONS_00052338	1	1	0	1
TCONS_00052353	1	0	1	0
TCONS_00052354	1	1	0	0
TCONS_00052355	1	1	0	0
TCONS_00052365	1	0	1	1
TCONS_00052366	1	0	1	0
TCONS_00052375	1	0	1	0
TCONS_00052376	1	1	1	1
TCONS_00052378	1	0	1	0
TCONS_00052381	1	1	0	0
TCONS_00052384	1	1	0	1
TCONS_00052385	1	1	1	1
TCONS_00052387	1	1	0	0
TCONS_00052390	1	1	0	1
TCONS_00052393	1	1	0	1
TCONS_00052394	1	1	0	0
TCONS_00052399	1	0	1	0
TCONS_00052406	1	0	1	1
TCONS_00052411	1	1	0	1
TCONS_00052422	1	0	1	1
TCONS_00052423	1	1	0	0
TCONS_00052425	1	1	1	1
TCONS_00052427	1	1	1	1
TCONS_00052438	1	0	1	0
TCONS_00052443	1	1	0	0
TCONS_00052444	1	0	0	1
TCONS_00052445	1	0	0	1
TCONS_00052446	1	1	1	1
TCONS_00052447	1	0	1	0
TCONS_00052452	1	1	1	1
TCONS_00052453	1	1	1	1
TCONS_00052454	1	1	1	1
TCONS_00052455	1	1	1	1
TCONS_00052456	1	1	1	1
TCONS_00052457	1	1	1	1
TCONS_00052458	1	1	1	1
TCONS_00052471	1	1	1	1
TCONS_00052474	1	1	0	1
TCONS_00052475	1	0	0	1
TCONS_00052480	1	1	1	1
TCONS_00052484	1	0	1	0
TCONS_00052485	1	0	1	0
TCONS_00052494	1	0	1	0
TCONS_00052496	1	1	0	0
TCONS_00052498	1	0	1	0
TCONS_00052525	1	0	1	0
TCONS_00052548	1	1	1	1
TCONS_00052549	1	1	0	0
TCONS_00052560	1	0	0	1
TCONS_00052565	1	1	1	1
TCONS_00052575	1	0	0	1
TCONS_00052598	1	0	1	1
TCONS_00052607	1	0	1	0
TCONS_00052608	1	0	1	0
TCONS_00052638	1	1	1	1
TCONS_00052653	1	1	1	0
TCONS_00052684	1	0	1	0
TCONS_00052693	1	1	0	0
TCONS_00052711	1	1	0	0
TCONS_00052722	1	0	1	0
TCONS_00052731	1	0	1	0
TCONS_00052736	1	0	1	0
TCONS_00052776	1	1	0	1
TCONS_00052793	1	0	1	0
TCONS_00052795	1	0	1	0
TCONS_00052800	1	1	0	1
TCONS_00052822	1	0	1	0
TCONS_00052837	0	1	0	1
TCONS_00052838	0	1	0	1
TCONS_00052846	0	1	1	1
TCONS_00052858	0	1	1	1
TCONS_00052867	0	1	1	0
TCONS_00052868	0	1	0	1
TCONS_00052889	0	1	1	1
TCONS_00052890	0	1	1	0
TCONS_00052896	0	1	0	1
TCONS_00052911	0	1	0	1
TCONS_00052923	0	1	0	1
TCONS_00052926	0	1	1	0
TCONS_00052929	0	1	0	1
TCONS_00052931	0	1	0	1
TCONS_00052936	0	1	0	1
TCONS_00052938	0	1	1	1
TCONS_00052970	0	1	1	1
TCONS_00052996	0	1	1	0
TCONS_00053004	0	1	0	1
TCONS_00053025	0	1	0	1
TCONS_00053038	0	1	0	1
TCONS_00053039	0	1	0	1
TCONS_00053059	0	1	1	0
TCONS_00053067	0	1	1	1
TCONS_00053072	0	1	0	1
TCONS_00053076	0	1	0	1
TCONS_00053085	0	1	1	1
TCONS_00053089	0	1	0	1
TCONS_00053098	0	1	1	0
TCONS_00053100	0	1	1	0
TCONS_00053101	0	1	0	1
TCONS_00053108	0	1	1	0
TCONS_00053123	0	1	1	0
TCONS_00053126	0	1	0	1
TCONS_00053129	0	1	0	1
TCONS_00053145	0	1	1	0
TCONS_00053149	0	1	0	1
TCONS_00053150	0	1	0	1
TCONS_00053160	0	1	1	1
TCONS_00053164	0	1	0	1
TCONS_00053166	0	1	1	1
TCONS_00053167	0	1	1	1
TCONS_00053181	0	1	1	0
TCONS_00053199	0	1	0	1
TCONS_00053209	0	1	0	1
TCONS_00053212	0	1	0	1
TCONS_00053219	0	1	1	1
TCONS_00053220	0	1	0	1
TCONS_00053231	0	1	0	1
TCONS_00053235	0	1	0	1
TCONS_00053239	0	1	0	1
TCONS_00053262	0	1	1	0
TCONS_00053263	0	1	1	1
TCONS_00053264	0	1	0	1
TCONS_00053267	0	1	0	1
TCONS_00053268	0	1	1	0
TCONS_00053274	0	1	0	1
TCONS_00053280	0	1	0	1
TCONS_00053281	0	1	1	1
TCONS_00053283	0	1	1	1
TCONS_00053285	0	1	1	0
TCONS_00053312	0	1	1	1
TCONS_00053318	0	1	0	1
TCONS_00053323	0	1	1	1
TCONS_00053324	0	1	1	1
TCONS_00053329	0	1	0	1
TCONS_00053330	0	1	0	1
TCONS_00053337	0	1	0	1
TCONS_00053359	0	1	1	1
TCONS_00053361	0	1	0	1
TCONS_00053380	0	1	0	1
TCONS_00053385	0	1	1	1
TCONS_00053388	0	1	0	1
TCONS_00053409	0	1	1	0
TCONS_00053412	0	1	0	1
TCONS_00053444	0	1	0	1
TCONS_00053462	0	1	1	0
TCONS_00053478	0	1	1	0
TCONS_00053487	0	1	1	1
TCONS_00053488	0	1	1	1
TCONS_00053506	0	1	0	1
TCONS_00053552	0	1	1	0
TCONS_00053554	0	1	0	1
TCONS_00053562	0	1	0	1
TCONS_00053563	0	1	0	1
TCONS_00053572	0	1	0	1
TCONS_00053573	0	1	1	1
TCONS_00053576	0	1	1	1
TCONS_00053579	0	1	0	1
TCONS_00053590	0	1	1	0
TCONS_00053608	0	1	0	1
TCONS_00053613	0	1	1	1
TCONS_00053635	0	1	1	1
TCONS_00053638	0	1	1	1
TCONS_00053651	0	1	0	1
TCONS_00053652	0	1	0	1
TCONS_00053653	0	1	0	1
TCONS_00053654	0	1	0	1
TCONS_00053660	0	1	1	0
TCONS_00053672	0	1	0	1
TCONS_00053674	0	1	1	1
TCONS_00053680	0	1	1	0
TCONS_00053682	0	1	0	1
TCONS_00053699	0	1	0	1
TCONS_00053718	0	1	0	1
TCONS_00053719	0	1	1	1
TCONS_00053720	0	1	1	1
TCONS_00053754	0	1	1	0
TCONS_00053775	0	1	0	1
TCONS_00053807	0	1	0	1
TCONS_00053808	0	1	1	1
TCONS_00053812	0	1	1	1
TCONS_00053816	0	1	0	1
TCONS_00053818	0	1	0	1
TCONS_00053819	0	1	1	0
TCONS_00053831	0	1	1	1
TCONS_00053842	0	1	1	0
TCONS_00053851	0	1	0	1
TCONS_00053858	0	1	0	1
TCONS_00053865	0	1	0	1
TCONS_00053867	0	1	1	1
TCONS_00053869	0	1	1	1
TCONS_00053871	0	1	0	1
TCONS_00053872	0	1	1	0
TCONS_00053873	0	1	0	1
TCONS_00053879	0	1	1	1
TCONS_00053888	0	1	1	1
TCONS_00053900	0	1	0	1
TCONS_00053910	0	1	1	1
TCONS_00053917	0	1	0	1
TCONS_00053919	0	1	1	1
TCONS_00053920	0	1	1	1
TCONS_00053921	0	1	1	1
TCONS_00053923	0	1	0	1
TCONS_00053933	0	1	0	1
TCONS_00053936	0	1	1	1
TCONS_00053945	0	1	1	0
TCONS_00053946	0	1	1	1
TCONS_00053950	0	1	1	1
TCONS_00053959	0	1	1	0
TCONS_00053966	0	1	0	1
TCONS_00053967	0	1	1	1
TCONS_00053969	0	1	0	1
TCONS_00053970	0	1	1	1
TCONS_00053972	0	1	0	1
TCONS_00053973	0	1	1	1
TCONS_00053974	0	1	0	1
TCONS_00053976	0	1	1	1
TCONS_00053977	0	1	1	0
TCONS_00053987	0	1	1	1
TCONS_00053988	0	1	1	1
TCONS_00053989	0	1	1	1
TCONS_00053992	0	1	0	1
TCONS_00053995	0	1	0	1
TCONS_00053999	0	1	0	1
TCONS_00054000	0	1	0	1
TCONS_00054006	0	1	1	0
TCONS_00054020	0	1	1	1
TCONS_00054022	0	1	0	1
TCONS_00054023	0	1	0	1
TCONS_00054037	0	1	0	1
TCONS_00054066	0	1	0	1
TCONS_00054174	0	1	0	1
TCONS_00054208	0	0	1	1
TCONS_00054229	0	0	1	1
TCONS_00054235	0	0	1	1
TCONS_00054290	0	0	1	1
TCONS_00054297	0	0	1	1
TCONS_00054315	0	0	1	1
TCONS_00054327	0	0	1	1
TCONS_00054425	0	0	1	1
TCONS_00054501	0	0	1	1
TCONS_00054516	0	0	1	1
TCONS_00054545	0	0	1	1
TCONS_00054558	0	0	1	1
TCONS_00054672	0	0	1	1
TCONS_00054729	0	0	1	1
TCONS_00054739	0	0	1	1
TCONS_00054784	0	0	1	1
TCONS_00054790	0	0	1	1
TCONS_00054804	0	0	1	1
TCONS_00054900	0	0	1	1
TCONS_00054936	0	0	1	1
TCONS_00054987	0	0	1	1
TCONS_00054991	0	0	1	1
TCONS_00055018	0	0	1	1
TCONS_00055040	0	0	1	1
TCONS_00055049	0	0	1	1
TCONS_00055064	0	0	1	1
TCONS_00055100	0	0	1	1
TCONS_00055113	0	0	1	1
TCONS_00055114	0	0	1	1
TCONS_00055282	0	0	1	1
TCONS_00056213	1	1	1	1
TCONS_00056225	1	1	0	0
TCONS_00056235	1	0	1	0
TCONS_00056238	1	0	1	0
TCONS_00056241	1	1	1	1
TCONS_00056242	1	1	1	1
TCONS_00056247	1	1	1	1
TCONS_00056252	1	0	1	0
TCONS_00056271	1	1	1	1
TCONS_00056272	1	1	1	1
TCONS_00056273	1	1	1	1
TCONS_00056274	1	0	1	0
TCONS_00056277	1	0	1	0
TCONS_00056278	1	1	1	0
TCONS_00056280	1	0	1	1
TCONS_00056281	1	1	1	0
TCONS_00056293	1	1	0	0
TCONS_00056297	1	1	0	0
TCONS_00056301	1	1	1	0
TCONS_00056303	1	1	1	1
TCONS_00056304	1	1	0	1
TCONS_00056305	1	1	1	1
TCONS_00056311	1	0	1	1
TCONS_00056324	1	0	1	1
TCONS_00056325	1	0	1	1
TCONS_00056326	1	1	1	1
TCONS_00056330	1	0	1	1
TCONS_00056331	1	0	1	1
TCONS_00056333	1	1	0	0
TCONS_00056334	1	0	1	0
TCONS_00056335	1	0	0	1
TCONS_00056342	1	1	0	0
TCONS_00056344	1	1	0	0
TCONS_00056345	1	1	0	0
TCONS_00056347	1	1	0	0
TCONS_00056351	1	1	1	1
TCONS_00056353	1	1	0	1
TCONS_00056354	1	1	0	1
TCONS_00056355	1	1	1	1
TCONS_00056356	1	1	1	1
TCONS_00056358	1	1	0	1
TCONS_00056363	1	1	1	1
TCONS_00056364	1	1	0	1
TCONS_00056365	1	1	1	1
TCONS_00056366	1	0	1	0
TCONS_00056367	1	0	1	0
TCONS_00056372	1	0	0	1
TCONS_00056373	1	1	1	1
TCONS_00056374	1	0	1	0
TCONS_00056375	1	1	0	0
TCONS_00056401	1	0	1	0
TCONS_00056405	1	0	1	0
TCONS_00056407	1	0	0	1
TCONS_00056409	1	1	0	1
TCONS_00056419	1	1	1	1
TCONS_00056420	1	0	0	1
TCONS_00056421	1	1	0	1
TCONS_00056424	1	1	0	0
TCONS_00056429	1	1	1	1
TCONS_00056445	1	1	0	0
TCONS_00056446	1	1	0	0
TCONS_00056447	1	1	0	0
TCONS_00056448	1	1	0	0
TCONS_00056449	1	1	0	0
TCONS_00056451	1	0	1	0
TCONS_00056452	1	0	1	0
TCONS_00056460	1	0	1	0
TCONS_00056481	1	1	0	0
TCONS_00056485	1	1	1	1
TCONS_00056486	1	1	0	0
TCONS_00056487	1	0	1	0
TCONS_00056488	1	1	1	1
TCONS_00056489	1	1	0	0
TCONS_00056492	1	0	1	0
TCONS_00056500	1	0	0	1
TCONS_00056503	1	1	1	1
TCONS_00056505	1	1	1	0
TCONS_00056516	1	1	1	1
TCONS_00056517	1	1	1	1
TCONS_00056521	1	0	1	0
TCONS_00056524	1	0	1	0
TCONS_00056525	1	0	1	0
TCONS_00056528	1	1	0	1
TCONS_00056529	1	1	1	1
TCONS_00056530	1	1	1	1
TCONS_00056532	1	0	0	1
TCONS_00056534	1	1	0	0
TCONS_00056536	1	1	0	0
TCONS_00056542	1	0	0	1
TCONS_00056543	1	1	1	1
TCONS_00056545	1	1	1	1
TCONS_00056549	1	1	0	1
TCONS_00056565	1	0	1	0
TCONS_00056566	1	0	0	1
TCONS_00056567	1	1	1	1
TCONS_00056576	1	0	1	0
TCONS_00056579	1	0	0	1
TCONS_00056586	1	0	1	0
TCONS_00056594	1	0	1	0
TCONS_00056610	1	0	1	0
TCONS_00056612	1	0	1	0
TCONS_00056620	1	1	1	0
TCONS_00056633	1	0	1	0
TCONS_00056669	0	1	1	0
TCONS_00056673	0	1	0	1
TCONS_00056697	0	1	0	1
TCONS_00056705	0	1	1	0
TCONS_00056723	0	1	0	1
TCONS_00056725	0	1	0	1
TCONS_00056726	0	1	0	1
TCONS_00056734	0	1	0	1
TCONS_00056735	0	1	0	1
TCONS_00056781	0	1	1	1
TCONS_00056787	0	1	0	1
TCONS_00056806	0	1	1	1
TCONS_00056821	0	1	1	1
TCONS_00056829	0	1	0	1
TCONS_00056830	0	1	0	1
TCONS_00056833	0	1	0	1
TCONS_00056837	0	1	1	1
TCONS_00056841	0	1	0	1
TCONS_00056843	0	1	0	1
TCONS_00056849	0	1	1	0
TCONS_00056863	0	1	0	1
TCONS_00056866	0	1	1	0
TCONS_00056868	0	1	0	1
TCONS_00056876	0	1	0	1
TCONS_00056878	0	1	1	1
TCONS_00056887	0	1	0	1
TCONS_00056923	0	1	0	1
TCONS_00056976	0	0	1	1
TCONS_00056985	0	0	1	1
TCONS_00056988	0	0	1	1
TCONS_00056999	0	0	1	1
TCONS_00057001	0	0	1	1
TCONS_00057002	0	0	1	1
TCONS_00057004	0	0	1	1
TCONS_00057010	0	0	1	1
TCONS_00057019	0	0	1	1
TCONS_00057033	0	0	1	1
TCONS_00057050	0	0	1	1
TCONS_00057110	0	0	1	1
TCONS_00057381	1	1	1	1
TCONS_00057383	1	1	1	1
TCONS_00057392	1	0	0	1
TCONS_00057394	1	0	1	0
TCONS_00057401	1	1	1	1
TCONS_00057412	1	0	1	0
TCONS_00057415	1	1	1	1
TCONS_00057423	1	1	0	0
TCONS_00057447	0	1	0	1
TCONS_00057454	0	1	1	1
TCONS_00057455	0	1	1	0
TCONS_00057460	0	1	0	1
TCONS_00057471	0	1	1	0
TCONS_00057505	0	0	1	1
TCONS_00057525	0	0	1	1
TCONS_00057582	1	1	1	1
TCONS_00057583	1	1	1	1
TCONS_00057588	1	1	1	0
TCONS_00057591	1	0	1	0
TCONS_00057592	1	0	1	0
TCONS_00057598	1	0	1	0
TCONS_00057599	1	1	1	1
TCONS_00057602	1	0	1	0
TCONS_00057604	1	0	1	0
TCONS_00057610	1	0	1	1
TCONS_00057613	1	0	1	0
TCONS_00057614	1	1	0	0
TCONS_00057615	1	0	0	1
TCONS_00057624	1	0	0	1
TCONS_00057625	1	1	0	1
TCONS_00057632	1	1	0	1
TCONS_00057636	1	1	1	1
TCONS_00057639	1	0	1	0
TCONS_00057640	1	1	1	1
TCONS_00057641	1	0	1	0
TCONS_00057643	1	0	1	0
TCONS_00057644	1	0	1	0
TCONS_00057646	1	0	1	0
TCONS_00057648	1	0	1	0
TCONS_00057650	1	0	1	0
TCONS_00057652	1	0	1	0
TCONS_00057653	1	1	0	0
TCONS_00057672	1	0	0	1
TCONS_00057680	1	1	1	1
TCONS_00057681	1	0	0	1
TCONS_00057700	1	0	1	0
TCONS_00057701	1	1	0	1
TCONS_00057702	1	0	1	0
TCONS_00057703	1	1	0	0
TCONS_00057704	1	0	0	1
TCONS_00057707	1	1	0	0
TCONS_00057708	1	1	1	0
TCONS_00057711	1	1	0	0
TCONS_00057714	1	0	1	0
TCONS_00057718	1	1	0	1
TCONS_00057722	1	1	1	1
TCONS_00057723	1	1	1	1
TCONS_00057727	1	1	0	0
TCONS_00057738	1	1	0	0
TCONS_00057742	1	1	1	1
TCONS_00057746	1	1	1	0
TCONS_00057747	1	1	1	1
TCONS_00057757	1	1	1	1
TCONS_00057758	1	0	0	1
TCONS_00057766	1	1	1	1
TCONS_00057770	1	0	1	1
TCONS_00057771	1	1	1	1
TCONS_00057775	1	1	1	1
TCONS_00057782	1	1	0	1
TCONS_00057785	1	0	1	0
TCONS_00057793	1	1	0	1
TCONS_00057797	1	0	1	0
TCONS_00057804	1	1	1	1
TCONS_00057805	1	1	1	1
TCONS_00057820	1	1	0	0
TCONS_00057824	1	1	0	1
TCONS_00057825	1	1	1	1
TCONS_00057829	1	0	1	0
TCONS_00057844	0	1	1	1
TCONS_00057848	0	1	1	1
TCONS_00057857	0	1	0	1
TCONS_00057859	0	1	1	0
TCONS_00057860	0	1	1	0
TCONS_00057862	0	1	1	1
TCONS_00057874	0	1	0	1
TCONS_00057884	0	1	0	1
TCONS_00057892	0	1	0	1
TCONS_00057903	0	1	1	1
TCONS_00057929	0	1	1	0
TCONS_00057935	0	1	0	1
TCONS_00057942	0	1	1	1
TCONS_00057945	0	1	1	1
TCONS_00057949	0	1	0	1
TCONS_00057981	0	1	0	1
TCONS_00057993	0	1	1	0
TCONS_00058019	0	0	1	1
TCONS_00058020	0	0	1	1
TCONS_00058030	0	0	1	1
TCONS_00058096	0	0	1	1
TCONS_00058278	1	1	1	1
TCONS_00058283	1	0	1	0
TCONS_00058284	1	0	1	0
TCONS_00058285	1	1	1	1
TCONS_00058303	1	1	1	1
TCONS_00058308	1	1	0	1
TCONS_00058309	1	1	0	1
TCONS_00058319	1	1	0	0
TCONS_00058322	1	0	1	1
TCONS_00058327	1	1	0	0
TCONS_00058331	1	0	1	1
TCONS_00058334	1	1	1	1
TCONS_00058335	1	1	1	1
TCONS_00058350	1	0	1	1
TCONS_00058351	1	0	1	0
TCONS_00058364	1	1	1	1
TCONS_00058372	1	0	1	1
TCONS_00058384	1	0	1	0
TCONS_00058386	1	0	1	0
TCONS_00058403	1	1	0	0
TCONS_00058404	1	0	1	1
TCONS_00058410	1	1	0	1
TCONS_00058432	0	1	1	1
TCONS_00058433	0	1	1	0
TCONS_00058437	0	1	1	1
TCONS_00058438	0	1	1	1
TCONS_00058439	0	1	1	0
TCONS_00058441	0	1	1	1
TCONS_00058454	0	1	0	1
TCONS_00058457	0	1	1	1
TCONS_00058460	0	1	1	1
TCONS_00058470	0	1	0	1
TCONS_00058491	0	1	0	1
TCONS_00058492	0	1	0	1
TCONS_00058493	0	1	0	1
TCONS_00058495	0	1	1	1
TCONS_00058497	0	1	1	1
TCONS_00058498	0	1	0	1
TCONS_00058499	0	1	1	1
TCONS_00058500	0	1	1	1
TCONS_00058501	0	1	1	1
TCONS_00058502	0	1	0	1
TCONS_00058506	0	1	1	1
TCONS_00058507	0	1	1	1
TCONS_00058563	0	0	1	1
TCONS_00058589	0	0	1	1
TCONS_00058694	1	0	0	1
TCONS_00058696	1	1	0	0
TCONS_00058697	1	0	0	1
TCONS_00058700	1	1	1	0
TCONS_00058701	1	0	1	0
TCONS_00058704	1	1	1	1
TCONS_00058707	1	0	1	1
TCONS_00058708	1	1	0	0
TCONS_00058736	1	1	0	1
TCONS_00058737	1	1	1	0
TCONS_00058738	1	1	0	0
TCONS_00058743	1	0	1	0
TCONS_00058748	1	0	1	0
TCONS_00058751	1	0	0	1
TCONS_00058753	1	1	1	1
TCONS_00058754	1	0	1	0
TCONS_00058756	1	0	1	1
TCONS_00058759	1	1	0	0
TCONS_00058760	1	1	0	0
TCONS_00058763	1	0	1	0
TCONS_00058764	1	0	1	0
TCONS_00058789	1	0	1	0
TCONS_00058795	1	1	1	1
TCONS_00058802	1	1	1	1
TCONS_00058803	1	1	1	0
TCONS_00058804	1	1	0	0
TCONS_00058805	1	0	0	1
TCONS_00058816	1	0	1	0
TCONS_00058820	1	0	1	0
TCONS_00058833	1	0	1	0
TCONS_00058837	1	1	0	1
TCONS_00058838	1	1	1	1
TCONS_00058849	1	1	1	1
TCONS_00058850	1	0	1	0
TCONS_00058857	1	1	1	0
TCONS_00058869	1	1	0	0
TCONS_00058874	1	0	1	1
TCONS_00058888	1	0	0	1
TCONS_00058899	1	1	0	0
TCONS_00058900	1	1	0	1
TCONS_00058901	1	0	0	1
TCONS_00058905	1	0	1	0
TCONS_00058906	1	1	1	1
TCONS_00058907	1	0	0	1
TCONS_00058908	1	1	0	0
TCONS_00058911	1	0	1	1
TCONS_00058920	1	1	1	1
TCONS_00058922	1	0	1	1
TCONS_00058923	1	1	1	1
TCONS_00058933	1	1	0	1
TCONS_00058943	1	1	1	1
TCONS_00058945	1	1	1	0
TCONS_00058946	1	1	1	1
TCONS_00058964	1	0	1	0
TCONS_00058983	1	1	1	1
TCONS_00058986	1	0	1	0
TCONS_00058989	1	0	1	1
TCONS_00058990	1	1	1	1
TCONS_00059023	1	1	1	1
TCONS_00059025	1	1	1	1
TCONS_00059026	1	1	1	1
TCONS_00059027	1	0	0	1
TCONS_00059029	1	1	1	1
TCONS_00059037	1	1	1	0
TCONS_00059048	1	1	1	1
TCONS_00059052	1	1	0	1
TCONS_00059054	1	0	1	0
TCONS_00059055	1	1	1	1
TCONS_00059058	1	0	1	1
TCONS_00059059	1	1	1	1
TCONS_00059062	1	1	1	1
TCONS_00059070	1	0	1	0
TCONS_00059074	1	0	1	1
TCONS_00059076	1	0	1	0
TCONS_00059078	1	0	1	0
TCONS_00059080	1	0	1	0
TCONS_00059090	1	1	1	1
TCONS_00059092	1	0	1	1
TCONS_00059093	1	1	1	1
TCONS_00059094	1	1	1	1
TCONS_00059100	1	1	0	1
TCONS_00059108	1	1	0	1
TCONS_00059109	1	0	0	1
TCONS_00059111	1	0	0	1
TCONS_00059115	1	1	0	1
TCONS_00059126	1	1	1	1
TCONS_00059135	1	1	1	1
TCONS_00059136	1	1	0	1
TCONS_00059137	1	1	1	0
TCONS_00059139	1	1	0	0
TCONS_00059141	1	1	0	0
TCONS_00059142	1	1	0	0
TCONS_00059149	1	0	1	0
TCONS_00059169	1	0	0	1
TCONS_00059171	1	0	1	0
TCONS_00059177	1	0	1	1
TCONS_00059184	1	1	1	1
TCONS_00059186	1	1	0	0
TCONS_00059191	1	0	0	1
TCONS_00059195	1	1	0	1
TCONS_00059198	1	0	1	1
TCONS_00059212	1	0	1	0
TCONS_00059214	1	0	0	1
TCONS_00059215	1	1	1	1
TCONS_00059218	1	1	1	0
TCONS_00059220	1	1	0	0
TCONS_00059228	1	1	0	0
TCONS_00059241	1	1	1	1
TCONS_00059246	1	0	0	1
TCONS_00059263	1	0	1	0
TCONS_00059264	1	0	1	0
TCONS_00059277	1	0	1	0
TCONS_00059278	1	0	1	0
TCONS_00059280	1	0	1	0
TCONS_00059283	1	0	1	0
TCONS_00059287	1	0	1	0
TCONS_00059288	1	1	0	1
TCONS_00059289	1	1	1	1
TCONS_00059294	1	0	1	1
TCONS_00059299	1	1	0	0
TCONS_00059300	1	0	1	0
TCONS_00059302	1	1	1	1
TCONS_00059304	1	1	1	1
TCONS_00059309	1	0	1	1
TCONS_00059317	1	0	1	0
TCONS_00059318	1	0	1	0
TCONS_00059319	1	1	1	1
TCONS_00059328	1	1	1	1
TCONS_00059332	1	1	1	1
TCONS_00059334	1	1	1	1
TCONS_00059335	1	1	0	0
TCONS_00059347	1	0	1	1
TCONS_00059348	1	1	1	0
TCONS_00059349	1	1	1	1
TCONS_00059363	1	1	1	0
TCONS_00059366	1	1	0	1
TCONS_00059377	1	1	0	1
TCONS_00059379	1	0	1	0
TCONS_00059409	1	0	1	0
TCONS_00059410	1	0	1	1
TCONS_00059419	1	0	1	0
TCONS_00059443	1	0	1	1
TCONS_00059444	1	1	1	1
TCONS_00059447	1	1	1	1
TCONS_00059448	1	1	1	1
TCONS_00059449	1	0	1	0
TCONS_00059450	1	1	1	0
TCONS_00059451	1	1	1	1
TCONS_00059455	1	1	0	1
TCONS_00059456	1	0	1	1
TCONS_00059471	1	1	1	1
TCONS_00059483	1	1	0	1
TCONS_00059484	1	1	0	1
TCONS_00059485	1	1	1	1
TCONS_00059488	1	1	1	1
TCONS_00059490	1	1	0	0
TCONS_00059492	1	0	1	1
TCONS_00059494	1	1	1	0
TCONS_00059508	1	1	0	0
TCONS_00059516	1	1	1	1
TCONS_00059519	1	1	1	1
TCONS_00059520	1	1	0	1
TCONS_00059522	1	0	1	0
TCONS_00059523	1	0	1	0
TCONS_00059526	1	1	1	1
TCONS_00059527	1	0	0	1
TCONS_00059528	1	1	0	1
TCONS_00059530	1	1	1	1
TCONS_00059532	1	1	0	0
TCONS_00059541	1	0	1	0
TCONS_00059555	1	1	0	1
TCONS_00059557	1	0	1	0
TCONS_00059562	1	0	1	0
TCONS_00059571	1	0	1	0
TCONS_00059588	1	0	1	1
TCONS_00059596	1	1	0	1
TCONS_00059598	1	0	1	0
TCONS_00059600	1	1	1	1
TCONS_00059601	1	1	1	1
TCONS_00059612	1	0	1	0
TCONS_00059620	1	1	1	1
TCONS_00059624	1	1	1	1
TCONS_00059625	1	0	1	1
TCONS_00059626	1	0	1	1
TCONS_00059636	1	1	1	1
TCONS_00059644	1	0	0	1
TCONS_00059646	1	0	1	0
TCONS_00059654	1	0	1	0
TCONS_00059666	1	0	1	0
TCONS_00059668	1	1	0	0
TCONS_00059670	1	1	0	1
TCONS_00059674	1	0	1	0
TCONS_00059695	1	1	1	1
TCONS_00059697	1	1	1	0
TCONS_00059701	1	0	0	1
TCONS_00059702	1	1	1	1
TCONS_00059714	1	0	1	0
TCONS_00059716	1	0	1	0
TCONS_00059721	1	1	1	1
TCONS_00059725	1	1	0	0
TCONS_00059726	1	1	1	1
TCONS_00059727	1	1	0	0
TCONS_00059731	1	1	1	0
TCONS_00059732	1	1	0	0
TCONS_00059733	1	1	0	0
TCONS_00059745	1	0	0	1
TCONS_00059754	1	1	0	1
TCONS_00059758	1	1	1	1
TCONS_00059759	1	1	0	0
TCONS_00059775	1	0	0	1
TCONS_00059778	1	1	0	0
TCONS_00059784	1	1	1	0
TCONS_00059786	1	0	1	0
TCONS_00059788	1	0	1	0
TCONS_00059789	1	1	1	1
TCONS_00059790	1	0	1	0
TCONS_00059795	1	1	1	1
TCONS_00059797	1	1	1	0
TCONS_00059798	1	0	1	0
TCONS_00059809	1	1	0	0
TCONS_00059819	1	0	1	0
TCONS_00059820	1	0	0	1
TCONS_00059821	1	0	0	1
TCONS_00059825	1	0	1	0
TCONS_00059826	1	0	1	1
TCONS_00059827	1	1	1	1
TCONS_00059831	1	1	0	0
TCONS_00059846	1	0	1	0
TCONS_00059847	1	1	1	1
TCONS_00059856	1	0	0	1
TCONS_00059866	1	1	0	1
TCONS_00059876	1	0	1	0
TCONS_00059887	1	1	1	1
TCONS_00059891	1	0	1	0
TCONS_00059893	1	0	1	0
TCONS_00059900	1	0	1	0
TCONS_00059901	1	1	0	1
TCONS_00059906	1	1	1	0
TCONS_00059936	1	1	1	1
TCONS_00059938	1	1	0	1
TCONS_00059939	1	1	0	1
TCONS_00059940	1	1	1	1
TCONS_00059948	1	1	1	0
TCONS_00059959	1	0	1	1
TCONS_00059966	1	0	1	0
TCONS_00059968	1	1	1	1
TCONS_00059972	1	1	1	1
TCONS_00059980	1	0	1	1
TCONS_00059990	1	1	1	1
TCONS_00060003	1	1	1	0
TCONS_00060005	1	0	1	0
TCONS_00060006	1	0	1	0
TCONS_00060017	1	1	1	1
TCONS_00060021	1	0	1	1
TCONS_00060025	1	1	1	1
TCONS_00060027	1	1	0	0
TCONS_00060032	1	0	1	0
TCONS_00060034	1	0	1	0
TCONS_00060036	1	1	1	1
TCONS_00060040	1	0	1	0
TCONS_00060041	1	1	1	1
TCONS_00060045	1	0	1	0
TCONS_00060047	1	0	1	0
TCONS_00060049	1	1	1	1
TCONS_00060052	1	0	1	0
TCONS_00060071	1	1	1	0
TCONS_00060073	1	1	1	0
TCONS_00060078	1	1	1	1
TCONS_00060083	1	1	1	1
TCONS_00060084	1	1	0	1
TCONS_00060088	1	0	1	0
TCONS_00060102	1	1	1	1
TCONS_00060103	1	1	0	0
TCONS_00060114	1	0	1	0
TCONS_00060119	1	1	1	1
TCONS_00060121	1	0	1	0
TCONS_00060128	1	1	0	1
TCONS_00060131	1	1	1	1
TCONS_00060143	1	0	1	0
TCONS_00060158	1	1	0	1
TCONS_00060170	1	0	1	0
TCONS_00060173	1	1	1	1
TCONS_00060174	1	1	0	1
TCONS_00060177	1	1	1	1
TCONS_00060182	1	0	1	0
TCONS_00060183	1	1	0	0
TCONS_00060184	1	1	0	0
TCONS_00060185	1	1	1	1
TCONS_00060191	1	1	1	1
TCONS_00060195	1	1	0	0
TCONS_00060200	1	1	1	0
TCONS_00060201	1	1	1	1
TCONS_00060202	1	1	1	1
TCONS_00060203	1	0	1	1
TCONS_00060204	1	1	1	1
TCONS_00060205	1	1	0	0
TCONS_00060206	1	1	0	1
TCONS_00060207	1	1	1	1
TCONS_00060209	1	0	1	0
TCONS_00060210	1	1	1	1
TCONS_00060212	1	0	1	0
TCONS_00060215	1	1	1	0
TCONS_00060216	1	0	1	0
TCONS_00060217	1	1	0	0
TCONS_00060219	1	0	1	0
TCONS_00060220	1	0	1	1
TCONS_00060222	1	0	1	0
TCONS_00060224	1	1	1	1
TCONS_00060226	1	0	1	0
TCONS_00060228	1	0	1	0
TCONS_00060233	1	0	1	0
TCONS_00060238	1	1	1	1
TCONS_00060239	1	1	0	1
TCONS_00060240	1	1	0	0
TCONS_00060241	1	0	1	1
TCONS_00060244	1	0	1	1
TCONS_00060245	1	0	0	1
TCONS_00060251	1	0	1	1
TCONS_00060253	1	0	1	0
TCONS_00060257	1	0	0	1
TCONS_00060259	1	1	0	1
TCONS_00060267	1	0	1	0
TCONS_00060269	1	0	1	0
TCONS_00060270	1	0	1	1
TCONS_00060272	1	1	1	1
TCONS_00060273	1	1	1	1
TCONS_00060275	1	1	1	1
TCONS_00060277	1	1	1	1
TCONS_00060278	1	1	0	1
TCONS_00060279	1	0	1	0
TCONS_00060286	1	0	1	0
TCONS_00060287	1	0	1	0
TCONS_00060288	1	0	1	0
TCONS_00060290	1	1	0	1
TCONS_00060292	1	1	0	0
TCONS_00060295	1	1	1	1
TCONS_00060297	1	0	1	0
TCONS_00060299	1	1	1	1
TCONS_00060301	1	1	1	1
TCONS_00060310	1	1	1	1
TCONS_00060311	1	1	1	1
TCONS_00060315	1	0	1	0
TCONS_00060324	1	0	1	0
TCONS_00060350	1	1	0	1
TCONS_00060351	1	1	0	1
TCONS_00060354	1	1	0	1
TCONS_00060368	1	0	1	0
TCONS_00060380	1	0	1	0
TCONS_00060381	1	1	1	1
TCONS_00060382	1	0	1	0
TCONS_00060390	1	1	1	1
TCONS_00060391	1	0	1	0
TCONS_00060400	1	0	1	0
TCONS_00060409	1	0	1	0
TCONS_00060410	1	0	1	0
TCONS_00060413	1	1	0	0
TCONS_00060414	1	1	0	0
TCONS_00060416	1	1	1	1
TCONS_00060417	1	1	1	1
TCONS_00060418	1	0	1	0
TCONS_00060420	1	1	1	1
TCONS_00060421	1	1	1	0
TCONS_00060433	1	0	1	0
TCONS_00060436	1	0	0	1
TCONS_00060452	1	1	0	1
TCONS_00060461	1	0	1	0
TCONS_00060487	1	1	0	0
TCONS_00060499	1	1	1	0
TCONS_00060501	1	1	0	0
TCONS_00060502	1	0	1	1
TCONS_00060506	1	1	0	0
TCONS_00060508	1	1	0	1
TCONS_00060513	1	1	1	1
TCONS_00060515	1	1	0	0
TCONS_00060518	1	0	0	1
TCONS_00060521	1	1	1	1
TCONS_00060529	1	1	1	0
TCONS_00060533	1	0	1	0
TCONS_00060535	1	0	1	1
TCONS_00060539	1	1	1	1
TCONS_00060540	1	0	1	0
TCONS_00060543	1	0	1	0
TCONS_00060544	1	0	1	0
TCONS_00060552	1	0	1	0
TCONS_00060553	1	0	1	0
TCONS_00060557	1	1	0	1
TCONS_00060561	1	1	0	1
TCONS_00060562	1	0	0	1
TCONS_00060564	1	1	0	1
TCONS_00060565	1	0	0	1
TCONS_00060566	1	1	0	1
TCONS_00060567	1	0	1	1
TCONS_00060568	1	1	0	0
TCONS_00060569	1	1	0	1
TCONS_00060576	1	0	1	0
TCONS_00060585	1	1	1	1
TCONS_00060589	1	1	1	1
TCONS_00060590	1	1	0	0
TCONS_00060601	1	0	1	0
TCONS_00060608	1	0	1	0
TCONS_00060618	1	1	0	1
TCONS_00060626	1	1	0	0
TCONS_00060627	1	1	0	0
TCONS_00060630	1	1	0	0
TCONS_00060634	1	1	0	0
TCONS_00060635	1	0	1	0
TCONS_00060638	1	0	1	0
TCONS_00060639	1	0	1	0
TCONS_00060643	1	1	0	1
TCONS_00060645	1	1	1	1
TCONS_00060646	1	1	1	1
TCONS_00060647	1	1	1	1
TCONS_00060649	1	1	1	1
TCONS_00060651	1	1	1	0
TCONS_00060657	1	0	1	1
TCONS_00060658	1	1	1	0
TCONS_00060668	1	1	0	0
TCONS_00060679	1	0	0	1
TCONS_00060686	1	0	0	1
TCONS_00060687	1	1	0	0
TCONS_00060696	1	1	1	1
TCONS_00060702	1	0	1	0
TCONS_00060703	1	0	1	0
TCONS_00060704	1	1	1	1
TCONS_00060705	1	0	1	0
TCONS_00060716	1	0	1	0
TCONS_00060721	1	1	1	0
TCONS_00060723	1	1	0	1
TCONS_00060724	1	1	1	1
TCONS_00060727	1	1	1	1
TCONS_00060733	1	1	0	0
TCONS_00060739	1	1	1	1
TCONS_00060740	1	0	1	0
TCONS_00060747	1	0	0	1
TCONS_00060750	1	0	0	1
TCONS_00060754	1	1	0	0
TCONS_00060757	1	0	1	0
TCONS_00060758	1	1	1	1
TCONS_00060765	1	0	1	0
TCONS_00060766	1	1	1	1
TCONS_00060767	1	1	0	1
TCONS_00060768	1	1	1	0
TCONS_00060769	1	1	1	1
TCONS_00060771	1	1	1	1
TCONS_00060775	1	1	1	0
TCONS_00060777	1	1	1	1
TCONS_00060778	1	1	1	1
TCONS_00060783	1	1	0	1
TCONS_00060786	1	1	1	0
TCONS_00060789	1	0	1	0
TCONS_00060794	1	0	1	1
TCONS_00060802	1	0	1	0
TCONS_00060834	1	0	1	0
TCONS_00060869	1	0	1	0
TCONS_00060892	1	0	1	0
TCONS_00060900	1	1	1	1
TCONS_00060913	1	0	1	0
TCONS_00060922	1	0	1	0
TCONS_00060938	1	0	1	0
TCONS_00060941	1	0	1	0
TCONS_00060955	1	0	1	0
TCONS_00060956	1	0	1	0
TCONS_00060957	1	0	1	0
TCONS_00060981	1	0	1	0
TCONS_00060990	1	1	1	1
TCONS_00061011	1	0	1	0
TCONS_00061036	1	0	1	0
TCONS_00061038	1	0	1	0
TCONS_00061055	1	0	1	0
TCONS_00061069	1	1	0	1
TCONS_00061070	1	1	1	1
TCONS_00061111	1	1	1	0
TCONS_00061118	1	0	1	1
TCONS_00061119	1	0	1	0
TCONS_00061147	0	1	0	1
TCONS_00061149	0	1	0	1
TCONS_00061150	0	1	0	1
TCONS_00061154	0	1	0	1
TCONS_00061155	0	1	1	1
TCONS_00061159	0	1	1	0
TCONS_00061165	0	1	1	0
TCONS_00061167	0	1	0	1
TCONS_00061196	0	1	0	1
TCONS_00061203	0	1	1	0
TCONS_00061207	0	1	1	0
TCONS_00061211	0	1	1	0
TCONS_00061244	0	1	0	1
TCONS_00061265	0	1	1	0
TCONS_00061270	0	1	0	1
TCONS_00061278	0	1	0	1
TCONS_00061281	0	1	0	1
TCONS_00061294	0	1	0	1
TCONS_00061311	0	1	0	1
TCONS_00061317	0	1	1	1
TCONS_00061331	0	1	0	1
TCONS_00061333	0	1	0	1
TCONS_00061335	0	1	1	0
TCONS_00061341	0	1	1	1
TCONS_00061342	0	1	0	1
TCONS_00061348	0	1	1	0
TCONS_00061352	0	1	1	0
TCONS_00061357	0	1	1	1
TCONS_00061393	0	1	1	1
TCONS_00061395	0	1	1	0
TCONS_00061398	0	1	1	1
TCONS_00061403	0	1	0	1
TCONS_00061405	0	1	0	1
TCONS_00061409	0	1	1	1
TCONS_00061411	0	1	0	1
TCONS_00061412	0	1	0	1
TCONS_00061414	0	1	0	1
TCONS_00061415	0	1	0	1
TCONS_00061416	0	1	0	1
TCONS_00061421	0	1	1	1
TCONS_00061425	0	1	1	1
TCONS_00061426	0	1	0	1
TCONS_00061431	0	1	0	1
TCONS_00061433	0	1	0	1
TCONS_00061455	0	1	0	1
TCONS_00061495	0	1	0	1
TCONS_00061503	0	1	0	1
TCONS_00061514	0	1	0	1
TCONS_00061571	0	1	1	1
TCONS_00061579	0	1	0	1
TCONS_00061587	0	1	1	0
TCONS_00061588	0	1	1	1
TCONS_00061610	0	1	0	1
TCONS_00061617	0	1	0	1
TCONS_00061637	0	1	1	1
TCONS_00061641	0	1	0	1
TCONS_00061661	0	1	1	1
TCONS_00061665	0	1	1	1
TCONS_00061724	0	1	0	1
TCONS_00061748	0	1	1	1
TCONS_00061749	0	1	1	0
TCONS_00061757	0	1	1	1
TCONS_00061758	0	1	0	1
TCONS_00061759	0	1	1	0
TCONS_00061764	0	1	0	1
TCONS_00061769	0	1	0	1
TCONS_00061774	0	1	0	1
TCONS_00061777	0	1	1	1
TCONS_00061792	0	1	0	1
TCONS_00061794	0	1	0	1
TCONS_00061805	0	1	0	1
TCONS_00061808	0	1	0	1
TCONS_00061811	0	1	0	1
TCONS_00061819	0	1	0	1
TCONS_00061821	0	1	1	0
TCONS_00061830	0	1	0	1
TCONS_00061832	0	1	1	1
TCONS_00061836	0	1	0	1
TCONS_00061842	0	1	0	1
TCONS_00061845	0	1	1	0
TCONS_00061846	0	1	0	1
TCONS_00061849	0	1	0	1
TCONS_00061850	0	1	1	0
TCONS_00061854	0	1	1	0
TCONS_00061855	0	1	0	1
TCONS_00061856	0	1	0	1
TCONS_00061861	0	1	1	0
TCONS_00061870	0	1	0	1
TCONS_00061898	0	1	0	1
TCONS_00061907	0	1	0	1
TCONS_00061908	0	1	0	1
TCONS_00061913	0	1	0	1
TCONS_00061914	0	1	0	1
TCONS_00061920	0	1	0	1
TCONS_00061921	0	1	0	1
TCONS_00061929	0	1	1	1
TCONS_00061933	0	1	0	1
TCONS_00061938	0	1	0	1
TCONS_00061960	0	1	0	1
TCONS_00061974	0	1	0	1
TCONS_00061975	0	1	0	1
TCONS_00061981	0	1	1	0
TCONS_00061997	0	1	0	1
TCONS_00062001	0	1	0	1
TCONS_00062008	0	1	1	0
TCONS_00062009	0	1	0	1
TCONS_00062010	0	1	1	0
TCONS_00062016	0	1	1	1
TCONS_00062018	0	1	1	0
TCONS_00062021	0	1	1	1
TCONS_00062031	0	1	1	0
TCONS_00062040	0	1	1	0
TCONS_00062044	0	1	1	0
TCONS_00062058	0	1	1	0
TCONS_00062060	0	1	1	0
TCONS_00062070	0	1	1	0
TCONS_00062086	0	1	0	1
TCONS_00062090	0	1	1	1
TCONS_00062095	0	1	1	0
TCONS_00062122	0	1	0	1
TCONS_00062131	0	1	0	1
TCONS_00062138	0	1	1	0
TCONS_00062140	0	1	0	1
TCONS_00062148	0	1	0	1
TCONS_00062161	0	1	0	1
TCONS_00062170	0	1	0	1
TCONS_00062171	0	1	0	1
TCONS_00062173	0	1	0	1
TCONS_00062174	0	1	1	0
TCONS_00062175	0	1	1	1
TCONS_00062185	0	1	0	1
TCONS_00062186	0	1	1	1
TCONS_00062189	0	1	0	1
TCONS_00062193	0	1	0	1
TCONS_00062195	0	1	0	1
TCONS_00062197	0	1	0	1
TCONS_00062215	0	1	1	0
TCONS_00062217	0	1	0	1
TCONS_00062233	0	1	0	1
TCONS_00062236	0	1	0	1
TCONS_00062249	0	1	1	1
TCONS_00062250	0	1	1	1
TCONS_00062254	0	1	0	1
TCONS_00062258	0	1	0	1
TCONS_00062259	0	1	1	0
TCONS_00062260	0	1	1	0
TCONS_00062262	0	1	1	0
TCONS_00062264	0	1	1	1
TCONS_00062291	0	1	1	0
TCONS_00062299	0	1	1	0
TCONS_00062300	0	1	1	0
TCONS_00062327	0	1	0	1
TCONS_00062328	0	1	1	0
TCONS_00062337	0	1	1	0
TCONS_00062340	0	1	1	0
TCONS_00062347	0	1	0	1
TCONS_00062351	0	1	0	1
TCONS_00062361	0	1	0	1
TCONS_00062362	0	1	1	1
TCONS_00062473	0	1	1	1
TCONS_00062607	0	0	1	1
TCONS_00062608	0	0	1	1
TCONS_00062632	0	0	1	1
TCONS_00062659	0	0	1	1
TCONS_00062688	0	0	1	1
TCONS_00062694	0	0	1	1
TCONS_00062786	0	0	1	1
TCONS_00062791	0	0	1	1
TCONS_00062793	0	0	1	1
TCONS_00062799	0	0	1	1
TCONS_00062825	0	0	1	1
TCONS_00062833	0	0	1	1
TCONS_00062871	0	0	1	1
TCONS_00062891	0	0	1	1
TCONS_00062920	0	0	1	1
TCONS_00062937	0	0	1	1
TCONS_00063111	0	0	1	1
TCONS_00063144	0	0	1	1
TCONS_00063177	0	0	1	1
TCONS_00063190	0	0	1	1
TCONS_00063218	0	0	1	1
TCONS_00063288	0	0	1	1
TCONS_00063289	0	0	1	1
TCONS_00063321	0	0	1	1
TCONS_00063328	0	0	1	1
TCONS_00063339	0	0	1	1
TCONS_00063407	0	0	1	1
TCONS_00063416	0	0	1	1
TCONS_00063445	0	0	1	1
TCONS_00063474	0	0	1	1
TCONS_00063486	0	0	1	1
TCONS_00063514	0	0	1	1
TCONS_00063537	0	0	1	1
TCONS_00063538	0	0	1	1
TCONS_00063547	0	0	1	1
TCONS_00063607	0	0	1	1
TCONS_00063613	0	0	1	1
TCONS_00063746	0	0	1	1
TCONS_00064925	1	1	1	1
TCONS_00064946	1	1	1	1
TCONS_00064951	1	0	0	1
TCONS_00064956	1	1	0	0
TCONS_00064963	1	0	0	1
TCONS_00064964	1	0	1	1
TCONS_00064966	1	1	1	0
TCONS_00064967	1	1	1	1
TCONS_00064968	1	1	1	1
TCONS_00064977	1	1	0	1
TCONS_00064984	1	0	1	0
TCONS_00064992	1	1	0	0
TCONS_00064993	1	1	0	1
TCONS_00065001	1	0	1	0
TCONS_00065009	1	1	0	0
TCONS_00065012	1	1	1	0
TCONS_00065026	1	0	1	0
TCONS_00065033	1	1	1	1
TCONS_00065034	1	0	1	0
TCONS_00065042	1	1	0	1
TCONS_00065043	1	1	1	0
TCONS_00065044	1	0	0	1
TCONS_00065048	1	0	1	0
TCONS_00065058	1	0	1	0
TCONS_00065060	1	0	1	0
TCONS_00065065	1	1	0	0
TCONS_00065081	1	1	0	1
TCONS_00065082	1	1	1	1
TCONS_00065083	1	1	1	1
TCONS_00065109	1	1	0	0
TCONS_00065110	1	1	0	1
TCONS_00065111	1	1	0	1
TCONS_00065112	1	1	0	1
TCONS_00065113	1	1	1	1
TCONS_00065114	1	1	1	1
TCONS_00065115	1	1	1	1
TCONS_00065116	1	0	1	1
TCONS_00065117	1	1	1	1
TCONS_00065120	1	1	1	1
TCONS_00065125	1	0	0	1
TCONS_00065128	1	0	1	0
TCONS_00065132	1	0	1	1
TCONS_00065136	1	1	1	1
TCONS_00065140	1	0	1	1
TCONS_00065159	1	1	1	1
TCONS_00065163	1	1	1	1
TCONS_00065164	1	1	1	1
TCONS_00065167	1	1	1	1
TCONS_00065170	1	1	0	0
TCONS_00065171	1	1	1	1
TCONS_00065172	1	0	1	1
TCONS_00065174	1	1	0	0
TCONS_00065176	1	1	1	1
TCONS_00065177	1	0	0	1
TCONS_00065181	1	1	0	1
TCONS_00065182	1	1	1	1
TCONS_00065185	1	0	1	1
TCONS_00065187	1	1	1	0
TCONS_00065188	1	1	1	1
TCONS_00065190	1	1	1	1
TCONS_00065192	1	1	1	1
TCONS_00065193	1	0	1	1
TCONS_00065198	1	1	0	0
TCONS_00065200	1	0	1	1
TCONS_00065201	1	1	1	1
TCONS_00065204	1	1	1	1
TCONS_00065209	1	1	1	1
TCONS_00065210	1	1	1	1
TCONS_00065220	1	0	1	0
TCONS_00065235	1	1	1	1
TCONS_00065236	1	1	0	1
TCONS_00065241	1	1	0	1
TCONS_00065250	1	0	1	0
TCONS_00065255	1	0	1	0
TCONS_00065256	1	0	1	0
TCONS_00065285	1	0	1	1
TCONS_00065293	1	0	1	0
TCONS_00065307	1	1	1	1
TCONS_00065311	1	1	1	1
TCONS_00065313	1	0	1	0
TCONS_00065326	1	1	1	1
TCONS_00065346	1	0	1	0
TCONS_00065347	1	1	1	1
TCONS_00065350	1	0	1	0
TCONS_00065351	1	1	0	0
TCONS_00065353	1	0	1	0
TCONS_00065360	1	0	1	0
TCONS_00065363	1	0	1	0
TCONS_00065364	1	1	1	0
TCONS_00065373	1	0	1	0
TCONS_00065379	1	1	1	1
TCONS_00065384	1	1	0	0
TCONS_00065396	1	1	1	1
TCONS_00065398	1	1	0	1
TCONS_00065401	1	1	1	1
TCONS_00065402	1	1	0	0
TCONS_00065403	1	1	0	0
TCONS_00065411	1	0	1	0
TCONS_00065424	1	0	1	0
TCONS_00065431	1	1	0	0
TCONS_00065433	1	1	1	1
TCONS_00065439	1	0	1	0
TCONS_00065447	1	1	1	1
TCONS_00065449	1	1	1	1
TCONS_00065450	1	0	0	1
TCONS_00065451	1	1	0	1
TCONS_00065452	1	0	0	1
TCONS_00065454	1	1	1	1
TCONS_00065455	1	0	1	1
TCONS_00065459	1	1	1	1
TCONS_00065460	1	0	1	0
TCONS_00065471	1	0	0	1
TCONS_00065484	1	1	0	1
TCONS_00065489	1	0	0	1
TCONS_00065491	1	1	0	0
TCONS_00065493	1	1	0	0
TCONS_00065501	1	0	1	1
TCONS_00065502	1	1	1	1
TCONS_00065509	1	0	1	0
TCONS_00065510	1	0	1	0
TCONS_00065511	1	0	1	0
TCONS_00065512	1	0	0	1
TCONS_00065514	1	0	1	0
TCONS_00065522	1	0	0	1
TCONS_00065529	1	1	1	0
TCONS_00065536	1	1	1	1
TCONS_00065542	1	1	0	0
TCONS_00065543	1	1	1	1
TCONS_00065544	1	0	1	0
TCONS_00065550	1	0	1	1
TCONS_00065551	1	0	0	1
TCONS_00065569	1	0	0	1
TCONS_00065574	1	0	0	1
TCONS_00065586	1	0	1	0
TCONS_00065621	1	1	1	1
TCONS_00065634	1	0	1	0
TCONS_00065637	1	1	1	0
TCONS_00065639	1	0	0	1
TCONS_00065643	1	1	1	1
TCONS_00065644	1	1	1	1
TCONS_00065647	1	1	1	1
TCONS_00065648	1	1	1	1
TCONS_00065651	1	1	1	1
TCONS_00065652	1	0	0	1
TCONS_00065661	1	1	1	0
TCONS_00065677	1	0	0	1
TCONS_00065679	1	0	0	1
TCONS_00065682	1	1	0	1
TCONS_00065683	1	1	0	1
TCONS_00065684	1	1	0	1
TCONS_00065685	1	1	1	1
TCONS_00065686	1	0	0	1
TCONS_00065691	1	0	1	0
TCONS_00065692	1	0	1	0
TCONS_00065693	1	0	0	1
TCONS_00065694	1	1	1	1
TCONS_00065696	1	1	0	1
TCONS_00065700	1	1	1	1
TCONS_00065703	1	0	1	0
TCONS_00065715	1	1	0	0
TCONS_00065717	1	1	0	1
TCONS_00065718	1	1	0	1
TCONS_00065719	1	1	1	1
TCONS_00065724	1	0	1	0
TCONS_00065731	1	1	0	1
TCONS_00065733	1	0	1	0
TCONS_00065735	1	0	1	0
TCONS_00065742	1	0	0	1
TCONS_00065745	1	1	1	1
TCONS_00065746	1	1	1	1
TCONS_00065789	1	0	1	1
TCONS_00065795	1	1	0	1
TCONS_00065796	1	1	0	1
TCONS_00065798	1	1	0	0
TCONS_00065801	1	0	0	1
TCONS_00065803	1	0	1	1
TCONS_00065804	1	0	0	1
TCONS_00065805	1	0	1	1
TCONS_00065812	1	1	0	1
TCONS_00065823	1	1	0	1
TCONS_00065824	1	1	0	1
TCONS_00065829	1	0	1	0
TCONS_00065831	1	0	1	0
TCONS_00065832	1	1	1	1
TCONS_00065838	1	0	1	1
TCONS_00065839	1	0	0	1
TCONS_00065842	1	1	0	1
TCONS_00065843	1	1	1	0
TCONS_00065844	1	1	1	1
TCONS_00065845	1	1	1	1
TCONS_00065846	1	1	1	1
TCONS_00065847	1	1	1	1
TCONS_00065862	1	1	1	1
TCONS_00065863	1	0	0	1
TCONS_00065865	1	1	1	1
TCONS_00065866	1	1	1	0
TCONS_00065868	1	1	1	1
TCONS_00065870	1	0	1	1
TCONS_00065884	1	1	0	1
TCONS_00065892	1	1	0	1
TCONS_00065908	1	1	1	0
TCONS_00065910	1	1	1	1
TCONS_00065913	1	1	1	1
TCONS_00065914	1	0	1	1
TCONS_00065915	1	1	1	1
TCONS_00065916	1	1	0	1
TCONS_00065917	1	1	1	1
TCONS_00065918	1	1	1	1
TCONS_00065920	1	1	1	1
TCONS_00065922	1	1	1	1
TCONS_00065926	1	1	0	1
TCONS_00065927	1	1	0	1
TCONS_00065930	1	1	1	1
TCONS_00065931	1	1	1	1
TCONS_00065937	1	1	0	0
TCONS_00065947	1	1	0	1
TCONS_00065956	1	1	1	1
TCONS_00065960	1	1	1	1
TCONS_00065961	1	1	1	1
TCONS_00065963	1	0	0	1
TCONS_00065964	1	1	1	0
TCONS_00065973	1	1	1	0
TCONS_00065979	1	1	1	1
TCONS_00065980	1	1	1	1
TCONS_00065997	1	1	1	1
TCONS_00066003	1	0	0	1
TCONS_00066007	1	1	0	1
TCONS_00066010	1	1	1	1
TCONS_00066012	1	0	1	0
TCONS_00066013	1	0	0	1
TCONS_00066014	1	0	0	1
TCONS_00066015	1	0	0	1
TCONS_00066030	1	1	1	1
TCONS_00066031	1	1	1	1
TCONS_00066033	1	1	1	0
TCONS_00066034	1	1	1	0
TCONS_00066037	1	0	1	0
TCONS_00066038	1	1	0	0
TCONS_00066048	1	1	1	1
TCONS_00066077	1	0	0	1
TCONS_00066078	1	1	0	0
TCONS_00066084	1	0	1	0
TCONS_00066085	1	1	1	1
TCONS_00066086	1	1	0	0
TCONS_00066087	1	1	0	0
TCONS_00066088	1	1	0	0
TCONS_00066105	1	0	1	0
TCONS_00066106	1	1	1	1
TCONS_00066114	1	0	1	0
TCONS_00066120	1	0	1	1
TCONS_00066126	1	1	0	0
TCONS_00066131	1	0	1	1
TCONS_00066132	1	1	1	1
TCONS_00066138	1	0	1	0
TCONS_00066142	1	1	1	1
TCONS_00066147	1	1	0	1
TCONS_00066157	1	1	1	0
TCONS_00066164	1	1	0	1
TCONS_00066168	1	1	0	0
TCONS_00066185	1	0	0	1
TCONS_00066187	1	0	0	1
TCONS_00066211	1	0	0	1
TCONS_00066212	1	0	0	1
TCONS_00066219	1	0	1	0
TCONS_00066226	1	0	1	1
TCONS_00066252	1	0	1	0
TCONS_00066264	1	1	1	1
TCONS_00066274	1	0	0	1
TCONS_00066282	1	0	1	0
TCONS_00066284	1	1	1	0
TCONS_00066288	1	1	1	1
TCONS_00066296	1	1	0	0
TCONS_00066297	1	1	0	0
TCONS_00066300	1	1	0	0
TCONS_00066307	1	1	1	1
TCONS_00066311	1	1	1	1
TCONS_00066315	1	1	1	1
TCONS_00066316	1	1	0	1
TCONS_00066317	1	0	1	0
TCONS_00066324	1	1	1	1
TCONS_00066329	1	0	1	0
TCONS_00066332	1	0	1	0
TCONS_00066348	1	1	0	0
TCONS_00066353	1	1	0	0
TCONS_00066355	1	1	0	0
TCONS_00066361	1	0	1	0
TCONS_00066362	1	1	1	1
TCONS_00066363	1	1	0	0
TCONS_00066364	1	1	1	1
TCONS_00066365	1	1	0	1
TCONS_00066369	1	0	1	1
TCONS_00066370	1	1	0	1
TCONS_00066374	1	1	0	0
TCONS_00066376	1	1	1	1
TCONS_00066382	1	1	1	1
TCONS_00066383	1	1	1	1
TCONS_00066401	1	1	1	1
TCONS_00066402	1	0	0	1
TCONS_00066412	1	1	1	1
TCONS_00066413	1	0	1	0
TCONS_00066414	1	1	1	0
TCONS_00066430	1	1	1	1
TCONS_00066439	1	0	1	0
TCONS_00066444	1	1	1	0
TCONS_00066487	1	0	1	1
TCONS_00066489	1	0	1	1
TCONS_00066516	1	1	1	1
TCONS_00066524	1	0	1	0
TCONS_00066526	1	0	0	1
TCONS_00066540	1	1	1	1
TCONS_00066547	1	0	1	0
TCONS_00066595	1	0	1	0
TCONS_00066598	1	1	1	1
TCONS_00066604	1	1	1	1
TCONS_00066664	0	1	0	1
TCONS_00066676	0	1	0	1
TCONS_00066683	0	1	1	1
TCONS_00066687	0	1	0	1
TCONS_00066707	0	1	1	0
TCONS_00066722	0	1	1	0
TCONS_00066726	0	1	1	1
TCONS_00066730	0	1	0	1
TCONS_00066732	0	1	0	1
TCONS_00066739	0	1	1	0
TCONS_00066743	0	1	1	0
TCONS_00066749	0	1	0	1
TCONS_00066765	0	1	1	1
TCONS_00066768	0	1	1	1
TCONS_00066776	0	1	0	1
TCONS_00066778	0	1	0	1
TCONS_00066810	0	1	0	1
TCONS_00066811	0	1	0	1
TCONS_00066831	0	1	1	1
TCONS_00066834	0	1	0	1
TCONS_00066843	0	1	1	1
TCONS_00066861	0	1	1	1
TCONS_00066863	0	1	0	1
TCONS_00066880	0	1	1	1
TCONS_00066893	0	1	1	1
TCONS_00066909	0	1	0	1
TCONS_00066913	0	1	0	1
TCONS_00066922	0	1	0	1
TCONS_00066931	0	1	0	1
TCONS_00066933	0	1	0	1
TCONS_00066944	0	1	0	1
TCONS_00066947	0	1	1	1
TCONS_00066951	0	1	0	1
TCONS_00066952	0	1	0	1
TCONS_00066964	0	1	0	1
TCONS_00066976	0	1	0	1
TCONS_00066997	0	1	0	1
TCONS_00066998	0	1	0	1
TCONS_00067001	0	1	0	1
TCONS_00067019	0	1	1	1
TCONS_00067020	0	1	1	0
TCONS_00067026	0	1	1	1
TCONS_00067028	0	1	1	1
TCONS_00067044	0	1	0	1
TCONS_00067056	0	1	1	0
TCONS_00067057	0	1	0	1
TCONS_00067067	0	1	0	1
TCONS_00067068	0	1	0	1
TCONS_00067071	0	1	0	1
TCONS_00067073	0	1	1	1
TCONS_00067074	0	1	1	1
TCONS_00067078	0	1	0	1
TCONS_00067082	0	1	1	1
TCONS_00067096	0	1	1	1
TCONS_00067098	0	1	1	0
TCONS_00067100	0	1	1	0
TCONS_00067104	0	1	0	1
TCONS_00067113	0	1	0	1
TCONS_00067117	0	1	0	1
TCONS_00067119	0	1	0	1
TCONS_00067120	0	1	0	1
TCONS_00067123	0	1	1	0
TCONS_00067124	0	1	0	1
TCONS_00067129	0	1	1	0
TCONS_00067144	0	1	1	1
TCONS_00067153	0	1	0	1
TCONS_00067155	0	1	0	1
TCONS_00067156	0	1	0	1
TCONS_00067157	0	1	0	1
TCONS_00067163	0	1	0	1
TCONS_00067166	0	1	1	0
TCONS_00067179	0	1	0	1
TCONS_00067197	0	1	0	1
TCONS_00067201	0	1	0	1
TCONS_00067212	0	1	1	1
TCONS_00067260	0	1	0	1
TCONS_00067272	0	1	1	1
TCONS_00067275	0	1	1	0
TCONS_00067280	0	1	0	1
TCONS_00067281	0	1	1	0
TCONS_00067282	0	1	1	1
TCONS_00067284	0	1	1	1
TCONS_00067286	0	1	0	1
TCONS_00067299	0	1	0	1
TCONS_00067301	0	1	0	1
TCONS_00067310	0	1	1	1
TCONS_00067318	0	1	0	1
TCONS_00067326	0	1	1	1
TCONS_00067333	0	1	1	0
TCONS_00067334	0	1	1	0
TCONS_00067335	0	1	1	0
TCONS_00067337	0	1	0	1
TCONS_00067338	0	1	0	1
TCONS_00067339	0	1	0	1
TCONS_00067350	0	1	1	1
TCONS_00067351	0	1	0	1
TCONS_00067365	0	1	0	1
TCONS_00067370	0	1	0	1
TCONS_00067386	0	1	1	1
TCONS_00067387	0	1	1	1
TCONS_00067389	0	1	0	1
TCONS_00067405	0	1	1	0
TCONS_00067412	0	1	0	1
TCONS_00067417	0	1	0	1
TCONS_00067427	0	1	1	1
TCONS_00067429	0	1	1	1
TCONS_00067430	0	1	0	1
TCONS_00067434	0	1	1	0
TCONS_00067435	0	1	1	1
TCONS_00067441	0	1	0	1
TCONS_00067446	0	1	0	1
TCONS_00067447	0	1	0	1
TCONS_00067449	0	1	0	1
TCONS_00067451	0	1	1	0
TCONS_00067452	0	1	0	1
TCONS_00067457	0	1	0	1
TCONS_00067458	0	1	0	1
TCONS_00067461	0	1	0	1
TCONS_00067462	0	1	0	1
TCONS_00067469	0	1	1	0
TCONS_00067479	0	1	1	1
TCONS_00067488	0	1	0	1
TCONS_00067489	0	1	0	1
TCONS_00067490	0	1	0	1
TCONS_00067496	0	1	0	1
TCONS_00067503	0	1	0	1
TCONS_00067505	0	1	1	0
TCONS_00067519	0	1	0	1
TCONS_00067525	0	1	0	1
TCONS_00067528	0	1	0	1
TCONS_00067529	0	1	0	1
TCONS_00067690	0	0	1	1
TCONS_00067712	0	0	1	1
TCONS_00067713	0	0	1	1
TCONS_00067776	0	0	1	1
TCONS_00067912	0	0	1	1
TCONS_00067972	0	0	1	1
TCONS_00068019	0	0	1	1
TCONS_00068045	0	0	1	1
TCONS_00068139	0	0	1	1
TCONS_00068150	0	0	1	1
TCONS_00068202	0	0	1	1
TCONS_00068270	0	0	1	1
TCONS_00068337	0	0	1	1
TCONS_00068348	0	0	1	1
TCONS_00068380	0	0	1	1
TCONS_00068381	0	0	1	1
TCONS_00068388	0	0	1	1
TCONS_00068394	0	0	1	1
TCONS_00068395	0	0	1	1
TCONS_00068460	0	0	1	1
TCONS_00068495	0	0	1	1
